# Supplementary material for: Study and application of graphene oxide in the synthesis of 2,3-disubstituted quinolinesviaa Povarov multicomponent reaction and subsequent oxidation
Source: Royal Society of Chemistry journal article supplement (doi:10.1039/d2ra01752k), 2022-01-01
Supplement: d2ra01752k1.pdf [file d2ra01752k1.pdf]

## SUPPORTING INFORMATION

### Study and application of graphene oxide on the synthesis of 2,3-disubstituted quinolines via Povarov multicomponent reaction and subsequent oxidation

#### Table of contents

|                                                                              |    |
|------------------------------------------------------------------------------|----|
| General methods .....                                                        | 2  |
| Control experiments .....                                                    | 3  |
| GO recyclability experiments .....                                           | 3  |
| XPS analysis of GO (Graphenea and Abalonyx) .....                            | 5  |
| ssNMR analysis of GO (Graphenea and Abalonyx) .....                          | 11 |
| Structural assignment of tetrahydroquinoline derivatives .....               | 14 |
| Synthesis of 1 via Povarov reaction .....                                    | 14 |
| Synthesis of quinolines 2 via oxidation of Povarov products .....            | 30 |
| One-pot synthesis of 2,3-disubstituted quinolines 2 .....                    | 35 |
| Synthesis of <i>endo</i> 3 and 4 .....                                       | 36 |
| Copies of <sup>1</sup> H- and <sup>13</sup> C-NMR Spectra of Compounds ..... | 38 |
| References .....                                                             | 70 |

## General methods

$^1\text{H}$  and  $^{13}\text{C}$  NMR spectra were recorded on a Varian Mercury 300 (at 300 MHz, and 75 MHz respectively) or on JEOL 400 (at 400 MHz and 101 MHz respectively).

Unless otherwise stated, NMR spectra were recorded using residual solvent as the internal standard  $^1\text{H}$  NMR:  $\text{CDCl}_3$  = 7.26,  $\text{CD}_3\text{OD}$  = 4.87;  $(\text{CD}_3)_2\text{SO}$  = 2.50; and  $^{13}\text{C}$  NMR:  $\text{CDCl}_3$  = 77.0;  $\text{CD}_3\text{OD}$  = 49.0;  $(\text{CD}_3)_2\text{SO}$  = 39.52. Data for  $^1\text{H}$  NMR spectra are reported as follows: chemical shift ( $\delta$  ppm), integration, multiplicity and coupling constants (Hz). Data for  $^{13}\text{C}$  NMR spectra are reported in terms of chemical shift ( $\delta$  ppm). Interpretation of spectra has been made also with the aid of gCOSY and gHSQC experiments. The following abbreviations are used to indicate the multiplicity in NMR spectra: s, singlet; d, doublet; t, triplet; q, quartet; m, multiplet.

I.R. spectra were recorded as solid, oil, or foamy samples, with the ATR (attenuated total reflectance) method.

TLC analyses were carried out on pre-coated Merck silica gel 60 F254 plates and viewed at UV (254 nm) and developed with Hanessian stain (dipping into a solution of  $(\text{NH}_4)_4\text{MoO}_4 \cdot 4\text{H}_2\text{O}$  (21 g) and  $\text{Ce}(\text{SO}_4)_2 \cdot 4\text{H}_2\text{O}$  (1 g) in  $\text{H}_2\text{SO}_4$  (31 mL) and  $\text{H}_2\text{O}$  (469 mL) and warming).  $R_f$  were measured after an elution of 7–9 cm.

Column chromatographies were done with the "flash" methodology using 220–400 mesh silica. Petroleum ether (40–60 °C) is abbreviated as PE. In extractive work-up, aqueous solutions were always re-extracted three times with the appropriate organic solvent. Organic extracts were always dried over  $\text{Na}_2\text{SO}_4$  and filtered, before evaporation of the solvent under reduced pressure.

All reactions using dry solvents were carried out under a nitrogen (or argon if specified) atmosphere. Unless otherwise noted, analytical grade solvents and commercially available reactants were used without further purification. Common reagents were purchased from commercial sources and were used without further purification. Graphene oxide (GO) was purchased from Graphenea and Abalonyx companies.

All products were characterized by  $^1\text{H}$ ,  $^{13}\text{C}$  NMR, IR and elemental analysis. The spectroscopic data of products were identical with the data reported in the literature.

## Control experiments

**Determination of the amount of Mn on GO (Graphenea):** Quantification of the trace of Mn impurities contained within GO has been determined by using two methods. With ICP-OES (Inductively coupled plasma - optical emission spectrometry), we detected low quantities of Mn (4740 ppm) in GO Graphenea. Sample preparation: acidic digestion of Graphene oxide (10.3 mg, Graphenea) was dissolved in a mixture of HCl/HNO<sub>3</sub> (1 mL, 3:1) and heated at 110 °C for 24 h, then at 150 °C for 6 h. The mixture was cooled and diluted to 10 mL with milliQ water, and subsequently analyzed by ICP-OES, founding 4740 ppm of Mn. Alternatively, the sample has been digested by MW heating, obtaining similar results. Similar results (4400 ppm) were obtained by performing UV-Vis analysis of KMnO<sub>4</sub> after treatment of the sample with sulphuric acid and potassium periodate.

**Povarov reaction with MnCl<sub>2</sub>•4H<sub>2</sub>O:** to a solution of 4-chlorobenzaldehyde (35 mg, 0.25 mmol), aniline (30 mg, 30 µL, 0.33 mmol) and 2,3-dihydrofuran (26 mg, 28 µL, 0.38 mmol) in CH<sub>3</sub>CN (0.3 mL), 6 µL of aq. solution of MnCl<sub>2</sub>•4H<sub>2</sub>O (5mg/mL) was added and the mixture was stirred at rt for 24h. Then, the solvent was removed under vacuo and the residue was purified by flash column chromatography (SiO<sub>2</sub>), eluting with PE/acetone (95:5 to 90:10) to afford **1a** (14 mg, 20%) as a mixture of diastereoisomers (*endo/exo* 80:20)

**Oxidation reaction with MnCl<sub>2</sub>•4H<sub>2</sub>O:** to a solution of pure *endo* **1a** (30 mg, 0.10 mmol) in CH<sub>3</sub>CN/H<sub>2</sub>O (1.00 mL), 10 µL of aq. solution of MnCl<sub>2</sub>•4H<sub>2</sub>O (5mg/mL) was added and the mixture was stirred at 120 °C for 48 h. Then, the solvent was removed under vacuo to afford only unreacted *endo* **1a**.

## GO recyclability experiments

**GO reusability in Povarov reaction:** reusability of GO (Graphenea) was verified for the standard reaction of 4-chlorobenzaldehyde (351 mg, 2.5 mmol), aniline (296 µL, 3.25 mmol) with 2,3-dihydrofuran (473 µL, 6.25 mmol) at room temperature for 24 h. The catalyst was recovered by dissolving the mixture in DCM/EtOAc 1:1 (10 mL) followed by centrifugation (5 min at 7800 rpm) for 4 times. The collected solutions were evaporated and the residue purified by column chromatography, giving **1a** (492 mg, 66%) as a mixture of diastereoisomers (*endo/exo* 80:20). The catalyst was washed with H<sub>2</sub>O (20 mL), MeOH (20 mL) and acetone (20 mL), dried under vacuum

overnight, and reused. This procedure was repeated for five reactions and **1a** was obtained with the yield of 48, 48, 41, 29 and 22%, respectively. The selectivity *endo/exo* resulted 80:20 by NMR of the crude after every run. The reusability experiments have been repeated by using commercial Abalonyx (S-126/36, No product 18000) affording **1a** in 60%, 46% and 45% yield, respectively. After the recyclability experiments, the recovered catalyst after the first and the last run were analyzed by XPS analysis.

**GO reusability in oxidation reaction:** reusability of GO (Graphene) was verified for the standard reaction of **endo 1a** (143 mg, 0.5 mmol) in CH<sub>3</sub>CN/H<sub>2</sub>O (4:1, 5.00 mL) at 120 °C for 48 h. The catalyst was recovered by dissolving the mixture in DCM/EtOAc 1:1 (10 mL) followed by centrifugation (5 min at 7800 rpm) for 4 times. The collected solutions were evaporated and the residue purified by column chromatography, giving **2a** (105 mg, 74%). The catalyst was washed with H<sub>2</sub>O (2x5 mL), MeOH (2x5 mL) and acetone (2x5 mL), dried under vacuum overnight, and reused. This procedure was repeated for two reactions and **2a** was obtained with the yield of 49 and 49 %, respectively. After the recyclability experiments, the recovered catalyst after the first and the last run were analyzed by XPS analysis.

Note that GO Abalonyx must be sonicated for 30 min before used, as suggested by the vendor.

## XPS analysis of GO (Graphene and Abalonyx)

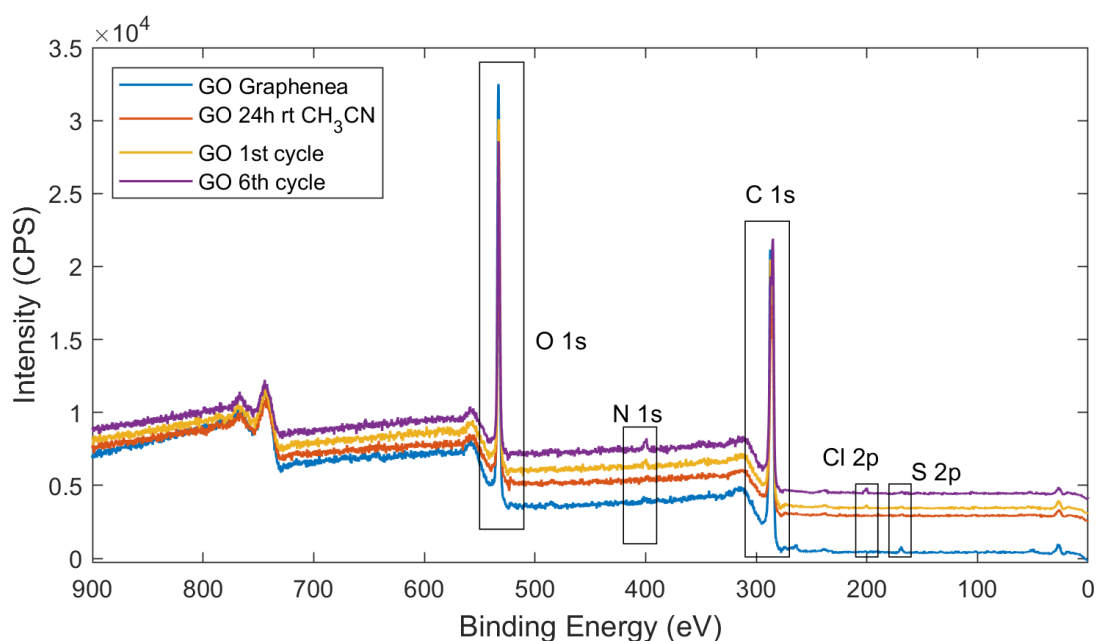

**Figure S1.** XPS Survey spectra of GO (Graphene); GO after CH<sub>3</sub>CN at room temperature for 24 h; GO after 1st cycle; GO after 6th cycle.

| Elements<br>Transition       | Binding<br>Energies<br>eV | GO<br>Graphene | Control    | 1st cycle  | 6th cycle  |
|------------------------------|---------------------------|----------------|------------|------------|------------|
| C 1s                         | 285                       | 72.1 ± 0.9     | 71.8 ± 0.9 | 72.5 ± 0.9 | 73.4 ± 0.9 |
| O 1s                         | 532.7                     | 26.1 ± 0.9     | 27.3 ± 0.9 | 26.2 ± 0.9 | 24.6 ± 0.9 |
| N 1s                         | 401-399                   | 0.4±0.1        | 0.3±0.1    | 0.7±0.1    | 1.1±0.1    |
| S 2p / S-O                   | 168.5                     | 0.40±0.05      | 0.4±0.1    | 0.4±0.0.1  | 0.20±0.05  |
| Si 2p / Si-O                 | 101.7                     | 0.9±0.1        | 0.2±0.1    | 0.10±0.05  | 0.3±0.1    |
| Mn 2p <sub>3/2</sub><br>MnOx | 641.8                     | 0.15±0.03*     | 0.05±0.03  | -          | -          |
| Cl 2p                        | 199.8                     | -              | -          | 0.20±0.05  | 0.4±0.1    |
| O/C Area                     |                           | 0.36±0.01      | 0.38±0.01  | 0.36±0.01  | 0.34±0.01  |

**Table S1.** XPS Atomic composition of GO (Graphene); GO after CH<sub>3</sub>CN at room temperature for 24 h; GO after 1st cycle; GO after 6th cycle. \*Mn sensitivity c.a. 0,03%.

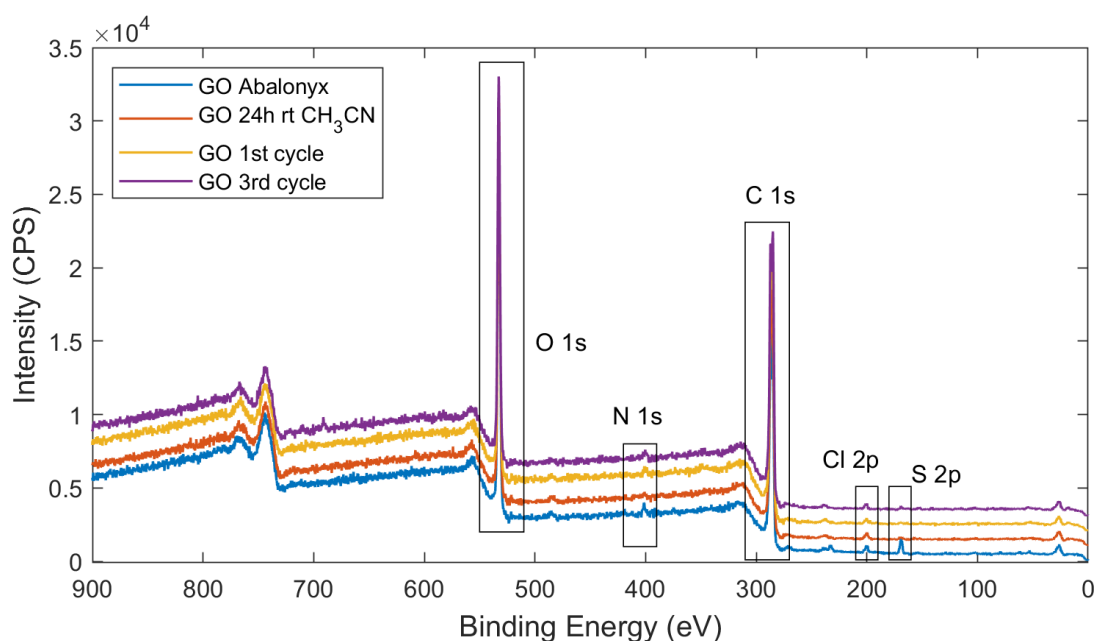

**Figure S2.** XPS Survey spectra of GO (Abalonyx GO); GO after CH<sub>3</sub>CN at room temperature for 24 h; GO after 1st cycle; GO after 3rd cycle.

| Elements     | Binding Energies eV | GO Aba     | Control    | 1 <sup>st</sup> cycle | 3 <sup>rd</sup> cycle |
|--------------|---------------------|------------|------------|-----------------------|-----------------------|
| C 1s         | 285                 | 65.9 ± 0.9 | 70.3 ± 0.9 | 73.9 ± 0.9            | 73.5 ± 0.9            |
| O 1s         | 532.7               | 30.3 ± 0.9 | 28.5 ± 0.9 | 24.5 ± 0.9            | 24.7 ± 0.9            |
| N 1s         | 401-399             | 1.0±0.1    | 0.3±0.03   | 0.7±0.1               | 1.0±0.1               |
| S 2p / S-O   | 168.5               | 1.8±0.2    | 0.20±0.05* | 0.20±0.05             | 0.20±0.05             |
| Si 2p / Si-O | 101.7               | 0.4±0.1    | 0.3±0.1    | 0.2±0.1               | 0.3±0.1               |
| Cl 2p        | 199.8               | 0.6±0.1    | 0.5±0.03   | 0.5±0.05              | 0.4±0.1               |
| O/C Area     |                     | 0.46±0.01  | 0.41±0.01* | 0.33±0.01             | 0.34±0.01             |

**Table S2.** XPS Atomic composition of GO (Abalonyx GO); GO after CH<sub>3</sub>CN at room temperature for 24 h; GO after 1st cycle; GO after 3rd cycle. O/C decrease mainly due to decrease of SO<sub>4</sub>, not due reduction of C-O groups.

| C groups<br>In C1s XPS             | GO Aba    | Control   | 1 <sup>st</sup> cycle | 3 <sup>rd</sup> Cycle |
|------------------------------------|-----------|-----------|-----------------------|-----------------------|
| <b>C=C sp<sup>2</sup> 284.4 eV</b> | 32.9±0.9  | 30.0±0.9  | 29.6±0.9              | 31.5±0.9              |
| <b>C=C* -0.8 eV</b>                | 4.4±0.4   | 5.4±0.9   | 4.8±0.9               | 4.3±0.5               |
| <b>C-C sp<sup>3</sup> +0.6</b>     | 7.7±0.5   | 8.1±0.5   | 18.0±0.5              | 17.8±0.5              |
| <b>C-OH +1.8</b>                   | 18.0±0.4  | 19.8±0.4  | 11.8±0.4              | 11.0±0.4              |
| <b>C-O-C +2.4</b>                  | 28.3±0.9  | 28.3±0.9  | 28.7±0.9              | 29.0±0.9              |
| <b>C=O +3.8</b>                    | 6.6±0.5   | 7.2±0.5   | 5.1±0.5               | 4.6±0.5               |
| <b>O-C=O +4.7</b>                  | 2.2±0.2   | 1.1±0.2   | 2.0±0.2               | 1.9±0.2               |
| <b>O/C fit</b>                     | 0.43±0.02 | 0.43±0.02 | 0.35±0.02             | 0.34±0.02             |

**Table S3.** XPS C 1s fitting of GO (Abalonyx GO); GO after CH<sub>3</sub>CN at room temperature for 24 h; GO after 1st cycle; GO after 3rd cycle.

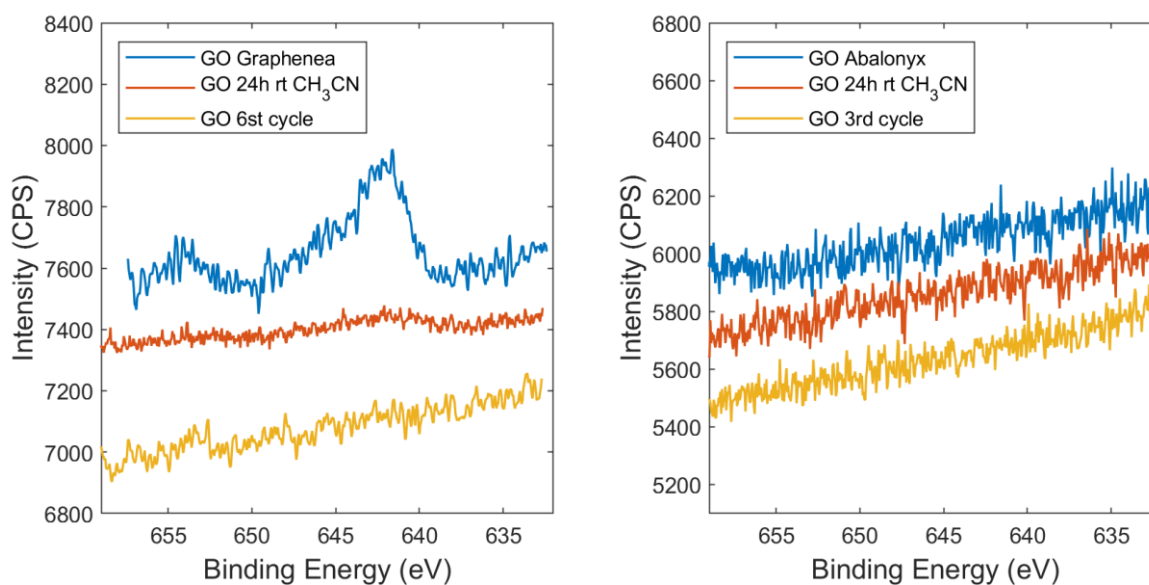

**Figure S3.** XPS Mn 2p spectra of GO (Graphenea); GO after CH<sub>3</sub>CN at room temperature for 24 h; GO after 6th cycle (left). GO (Abalonyx); GO after CH<sub>3</sub>CN at room temperature for 24 h; GO after 3rd cycle (right).

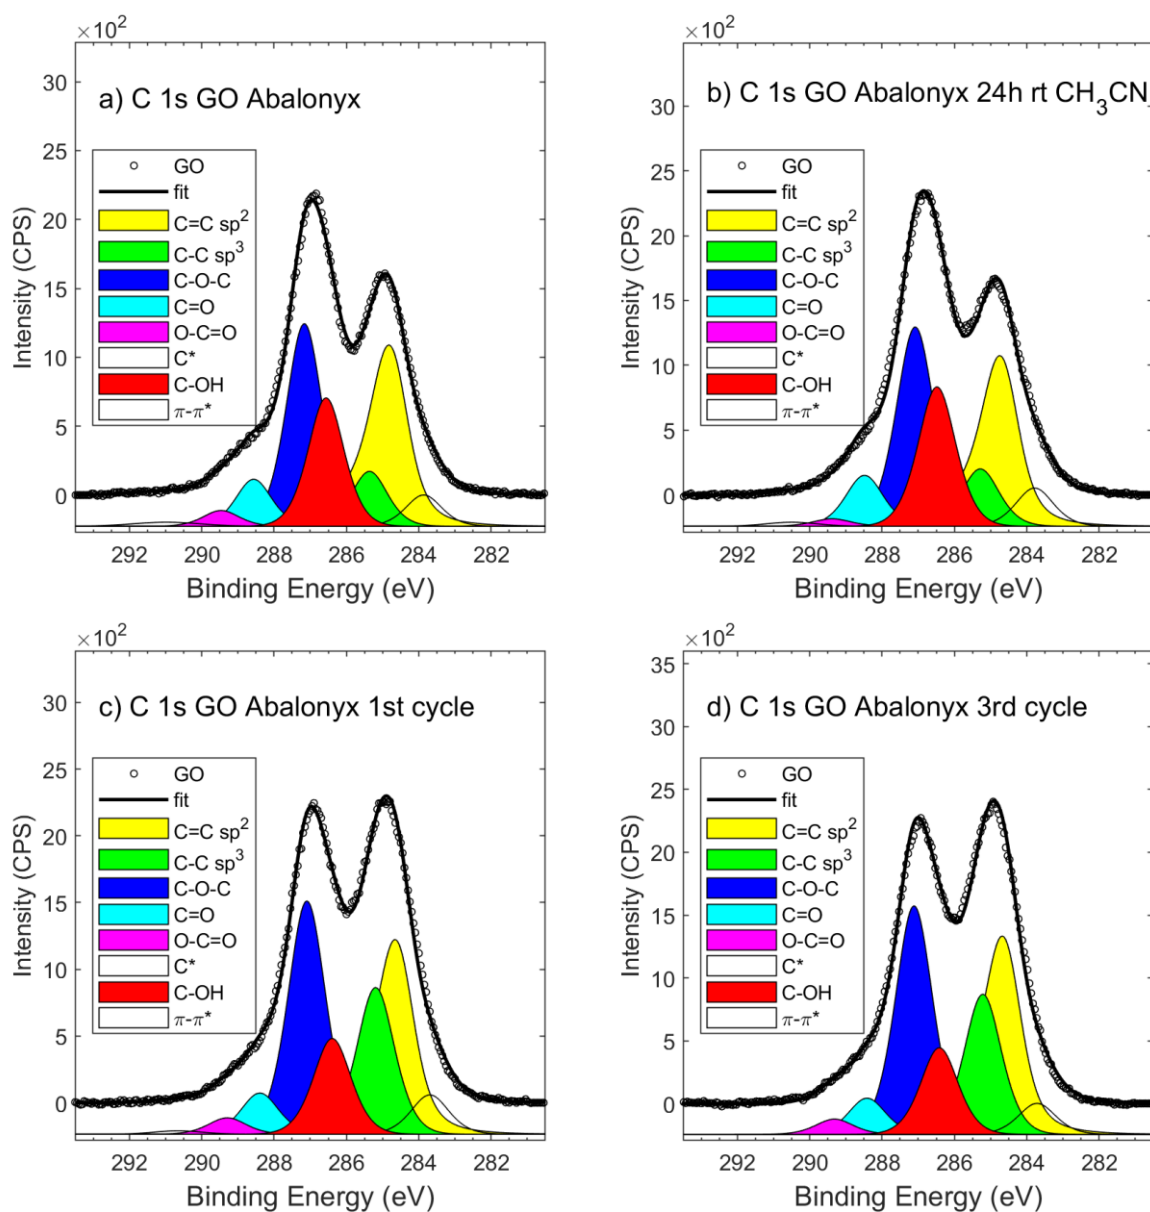

**Figure S4.** XPS C 1s signal of: a) commercial Abalonyx GO; b) GO after  $CH_3CN$  at room temperature for 24 h; c) GO after 1st cycle; d) GO after 3rd cycle.



| C groups<br>In C1s XPS             | GO Graphenea | Control   | 1st cycle | 6th cycle |
|------------------------------------|--------------|-----------|-----------|-----------|
| <b>C=C sp<sup>2</sup> 284.4 eV</b> | 42.2±0.9     | 35.4±0.9  | 43.7±0.9  | 45.5±0.9  |
| <b>C=C* -0.8 eV</b>                | 4.3±0.4      | 7.2±0.9   | 6.0±0.9   | 5.6±0.5   |
| <b>C-C sp<sup>3</sup> +0.6</b>     | 3.9±0.5      | 6.4±0.5   | 3.4±0.5   | 7.0±0.5   |
| <b>C-OH +1.8</b>                   | 12.6±0.4     | 16.1±0.4  | 20.0±0.4  | 12.3±0.4  |
| <b>C-O-C +2.4</b>                  | 29.1±0.9     | 25.6±0.9  | 22.0±0.9  | 24.5±0.9  |
| <b>C=O +3.8</b>                    | 6.0±0.5      | 7.8±0.5   | 4.2±0.5   | 3.8±0.5   |
| <b>O-C=O +4.7</b>                  | 1.9±0.2      | 1.4±0.2   | 0.7±0.2   | 1.3±0.2   |
| <b>O/C fit</b>                     | 0.37±0.02    | 0.41±0.02 | 0.37±0.02 | 0.31±0.02 |

**Table S4.** XPS C 1s fitting of GO (Graphenea GO); GO after CH<sub>3</sub>CN at room temperature for 24 h; GO after 1st cycle; GO after 6th cycle.

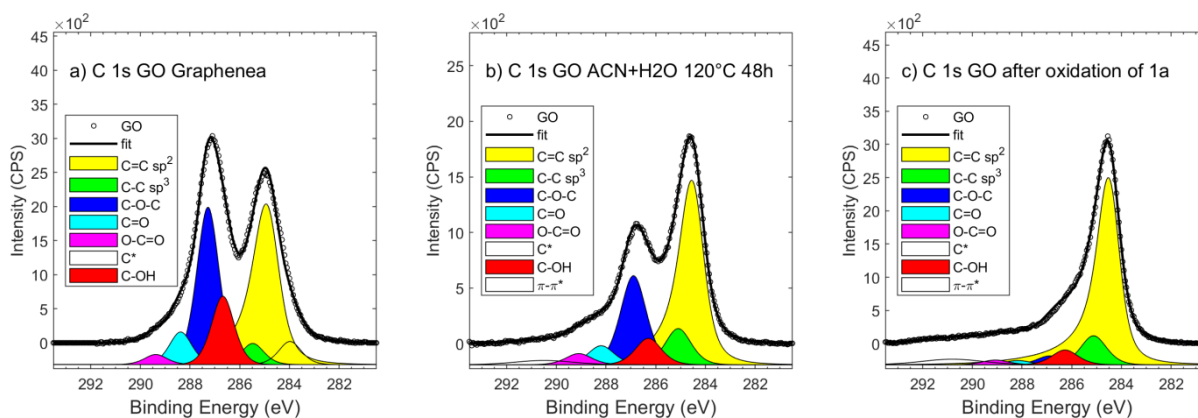

**Figure S5.** XPS C 1s signal of: a) commercial Graphenea GO; b) GO after CH<sub>3</sub>CN/H<sub>2</sub>O 4:1 at 120°C for 48 h; c) GO after oxidation. Sp<sup>2</sup> fraction was 42%, 54% and 78%, respectively.

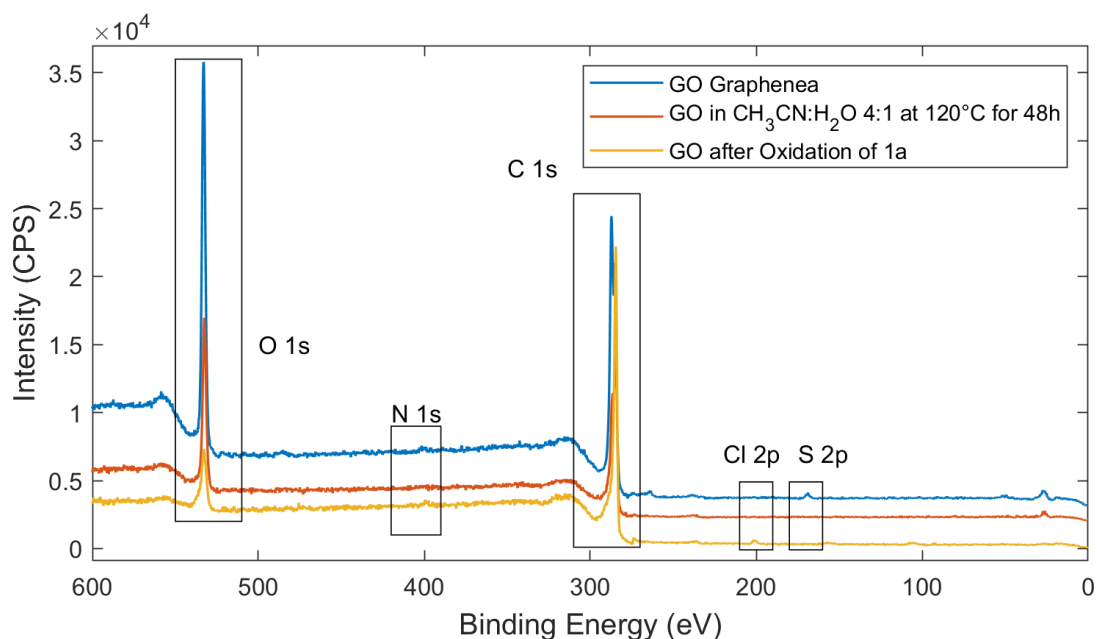

**Figure S6.** XPS survey spectra of commercial Abalonyx GO; GO after  $\text{CH}_3\text{CN}/\text{H}_2\text{O}$  4:1 at  $120^\circ\text{C}$  for 48 h; GO after oxidation.

| Elements | GO Graphenea      | Control         | GO after oxidation |
|----------|-------------------|-----------------|--------------------|
| C        | $72.1 \pm 0.9$    | $78.3 \pm 0.9$  | $88.2 \pm 0.9$     |
| O        | $26.1 \pm 0.9$    | $21.4 \pm 0.9$  | $10.7 \pm 0.9$     |
| N        | $0.4 \pm 0.1$     | $0.3 \pm 0.1$   | $0.4 \pm 0.1$      |
| S-O      | $0.40 \pm 0.05$   | -               | -                  |
| Si-O     | $0.9 \pm 0.1$     | -               | -                  |
| MnOx     | $0.15 \pm 0.03^*$ | -               | -                  |
| Cl       | -                 | -               | $0.70 \pm 0.05$    |
| O/C Area | $0.36 \pm 0.01$   | $0.28 \pm 0.01$ | $0.12 \pm 0.01$    |

**Table S5.** XPS Atomic composition of GO (Graphenea); GO after  $\text{CH}_3\text{CN}/\text{H}_2\text{O}$  4:1 at  $120^\circ\text{C}$  for 48 h; GO after oxidation. \*Mn sensitivity c.a. 0,03%.

## ssNMR analysis of GO (Graphene and Abalonyx)

| conditions                                | Csp2<br>130 ppm | C sp3<br>31 ppm | COH<br>70 ppm | C-O-C<br>60 ppm | O-C=O<br>167 ppm |
|-------------------------------------------|-----------------|-----------------|---------------|-----------------|------------------|
| GO Graphenea control<br>in ACN, 24h, 20°C | 30.0±0.9        | -               | 25.9±0.9      | 43.3±0.9        | 0.8±0.3          |
| GO Graphenea after 1<br>cycle             | 27.8±0.9        | 13.0±0.9        | 18.5±0.9      | 39.0±0.9        | 1.8±0.3          |
| GO Graphenea after 6<br>cycles            | 30.1±0.9        | 14.4±0.9        | 20.7±0.9      | 34.6±0.9        | 0.3±0.2          |
| GO Abalonyx control in<br>ACN, 24h, 20°C  | 28.0±0.9        | -               | 23.5±0.9      | 38.5±0.9        | 9.9±0.3          |
| GO Abalonyx after 1<br>cycle              | 26.5±0.9        | 14.4±0.9        | 20.3±0.9      | 33.7±0.9        | 5.1±0.3          |
| GO Abalonyx after 3<br>cycles             | 29.2±0.9        | 13.9±0.9        | 20.9±0.9      | 33.0±0.9        | 3.0±0.3          |

**Table S6.** Quantitative composition of GO in different conditions obtained by using ssNMR <sup>13</sup>C direct excitation.

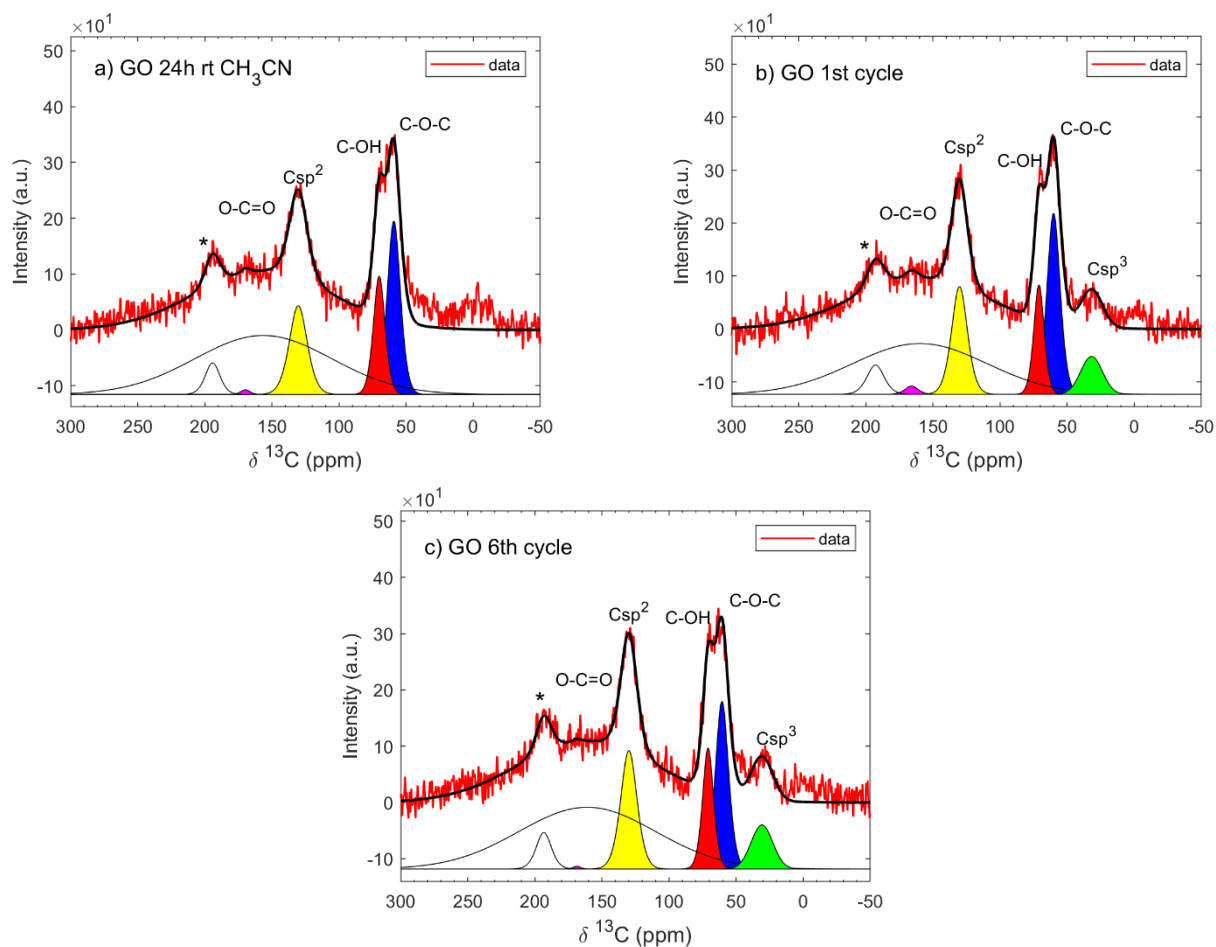

**Figure S7.**  $^{13}\text{C}$  direct excitation ssNMR spectra of GO (Graphene) after  $\text{CH}_3\text{CN}$  at room temperature for 24 h; GO after 1st cycle; GO after 6th cycle. spinning side bands are marked with \*.

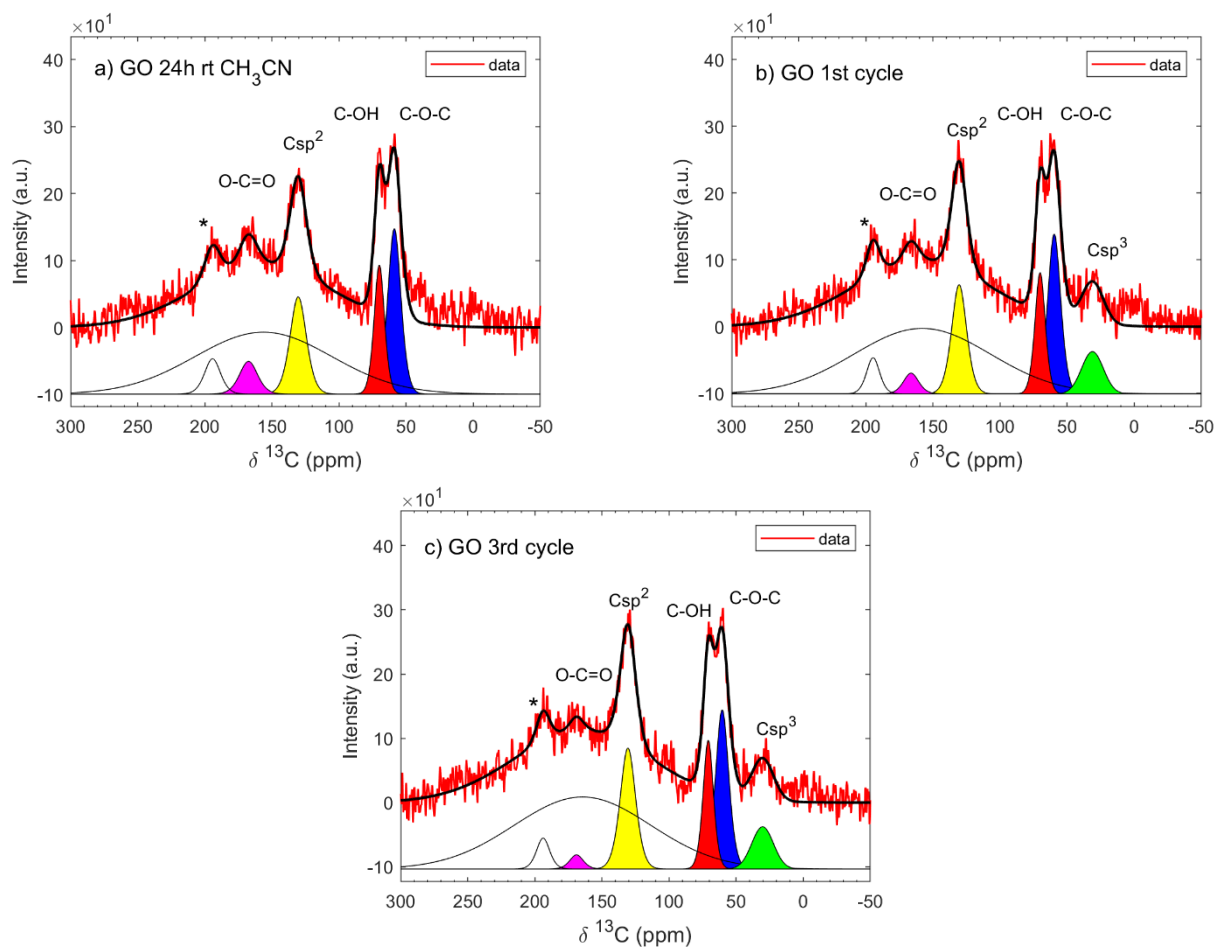

**Figure S8.**  $^{13}\text{C}$  direct excitation ssNMR spectra of GO (Abalonyx) after  $\text{CH}_3\text{CN}$  at room temperature for 24 h; GO after 1st cycle; GO after 3rd cycle.

## Structural assignment of tetrahydroquinoline derivatives

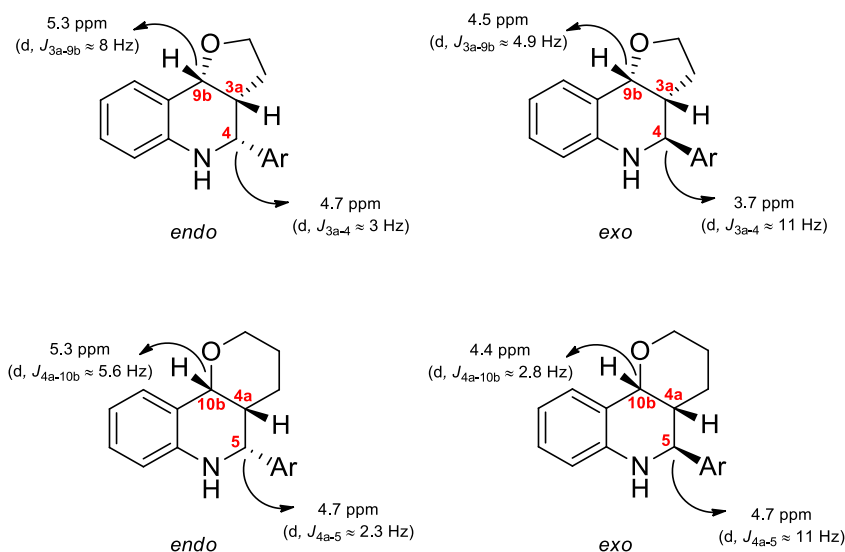

The stereochemistry of the furo- and pyrano- tetrahydroquinolines has been determined comparing coupling constants of protons 3a-9b and 3a-4, or 4a-10b and 4a-5 with the data reported on the literature.<sup>1</sup>

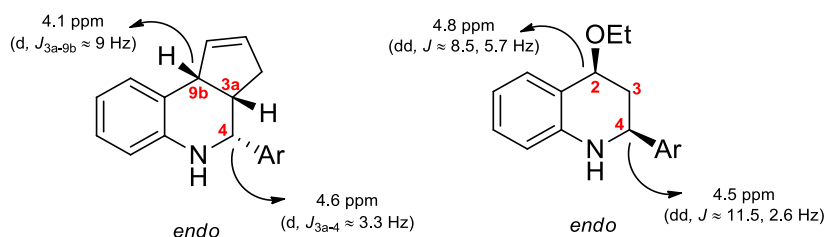

The stereochemistry of cyclopentatetrahydroquinoline and of ethoxy-tetrahydroquinoline has been determined comparing coupling constants of protons 3a-9b and 3a-4, or 2-3 and 3-4 with the data reported on the literature.<sup>2</sup>

## Synthesis of 1 via Povarov reaction

### Synthesis of 4-(4-chlorophenyl)-2,3,3a,4,5,9b-hexahydrofuro[3,2-c]quinoline 1a.

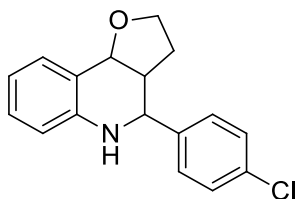

A 2 mL screw-capped vial was equipped with a magnetic stirring bar and charged with GO (5 mg) and CH<sub>3</sub>CN (300  $\mu$ L). The resulting suspension was sonicated for 2 min, using an ultrasonic bath,

then 4-chlorobenzaldehyde (35 mg, 0.25 mmol), aniline (30 mg, 30  $\mu$ L, 0.325 mmol) and 2,3-dihydrofuran (26 mg, 28  $\mu$ L, 0.38 mmol) were added to the mixture. The sealed reaction vial was stirred at rt for 4 h. After completion of the reaction, the reaction mixture was filtered through a celite cake, washing with DCM/EtOAc 1:1 (15 mL). The filtrate was evaporated to dryness in vacuo and the residue was purified by flash column chromatography ( $\text{SiO}_2$ ), eluting with PE/acetone (95:5 to 85:15) to afford **1a** as a mixture of diastereoisomers (*endo/exo* 80:20 determined by  $^1\text{H}$  NMR) as white solid (44 mg, 62%). Trituration from  $\text{CH}_3\text{CN}$  gave the pure **endo 1a** as white powder. The physical and spectral data agreed with those reported.<sup>3</sup>

**endo 1a:**  $R_f$  = 0.46 (PE/acetone 85:15); m.p. 204 - 206°C ( $\text{CH}_3\text{CN}$ ) (Lit.<sup>3</sup> mp: 152–153 °C); I.R.:  $\bar{\nu}$  ( $\text{cm}^{-1}$ ) = 3388, 3317, 3059, 2978, 2923, 2880, 2851, 1608, 1588, 1486, 1410, 1366, 1338, 1319, 1297, 1262, 1185, 1145, 1117, 1085, 1057, 1035, 1022, 1013, 996, 973, 942, 914, 884, 843, 824, 794, 751, 673;  $^1\text{H}$  NMR (400 MHz,  $\text{CDCl}_3$ )  $\delta$  7.45 – 7.32 (m, 5H, 9-*H*, 4H-Ar), 7.10 (t,  $J$  = 7.5 Hz, 1H, 7-*H*), 6.83 (td,  $J$  = 7.4, 1.2 Hz, 1H, 8-*H*), 6.61 (dd,  $J$  = 8.0, 1.1 Hz, 1H, 6-*H*), 5.27 (d,  $J$  = 7.9 Hz, 1H, 9b-*H*), 4.68 (d,  $J$  = 3.1 Hz, 1H, 4-*H*), 3.88 – 3.77 (m, 2H, N-*H* and 2-*H*), 3.72 (td,  $J$  = 8.5, 6.9 Hz, 1H, 2-*H*), 2.81 – 2.70 (m, 1H, 3a-*H*), 2.23 – 2.10 (m, 1H, 3-*H*), 1.57 – 1.45 (m, 1H, 3-*H*);  $^{13}\text{C}$  NMR (101 MHz,  $\text{CDCl}_3$ )  $\delta$  144.7, 140.8, 133.4, 130.2, 128.9, 128.6, 128.0, 122.7, 119.5, 115.2, 75.9, 66.9, 57.0, 45.7, 24.7; Anal. Calcd. for  $\text{C}_{17}\text{H}_{16}\text{ClNO}$ : % C 71.45; H 5.64; N 4.90; O 5.60: C 71.46; H 5.73; N 4.80; O 5.64.

#### Synthesis of 4-(4-chlorophenyl)-8-methyl-2,3,3a,4,5,9b-hexahydrofuro[3,2-*c*]quinoline **1b**.

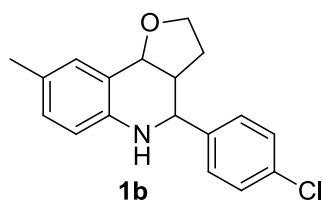

A 2 mL screw-capped vial was equipped with a magnetic stirring bar and charged with GO (5 mg) and  $\text{CH}_3\text{CN}$  (300  $\mu$ L). The resulting suspension was sonicated for 2 min, using an ultrasonic bath, then 4-chlorobenzaldehyde (35 mg, 0.25 mmol), *p*-toluidine (35 mg, 36  $\mu$ L, 0.33 mmol) and 2,3-dihydrofuran (26 mg, 28  $\mu$ L, 0.38 mmol) were added to the mixture. The sealed reaction vial was stirred at rt for 24 h. After completion of the reaction, the reaction mixture was filtered through a celite cake, washing with DCM/EtOAc 1:1 (15 mL). The filtrate was evaporated to dryness in vacuo and the residue was purified by flash column chromatography ( $\text{SiO}_2$ ), eluting with PE/acetone (95:5 to 85:15) to afford **1b** as a mixture of diastereoisomers (*endo/exo* 68:32 determined by  $^1\text{H}$  NMR) as cream amorphous solid (30 mg, 40%). The physical and spectral data agreed with those

reported.<sup>4, 5</sup>  $R_f = 0.30$  (PE/acetone 90:10); I.R.:  $\bar{\nu}$  ( $\text{cm}^{-1}$ ) = 3304, 2973, 2942, 2910, 2876, 1621, 1509, 1489, 1409, 1362, 1299, 1261, 1159, 1085, 1034, 819;  $^1\text{H}$  NMR (300 MHz,  $\text{CDCl}_3$ ) selected data for **endo 1b**:  $\delta$  7.44 – 7.32 (m, 4H, 4*H*-Ar), 7.17 (d,  $J = 1.6$  Hz, 1H, 9-*H*), 6.97 – 6.88 (m, 1H, 7-*H*), 6.55 (t,  $J = 7.8$  Hz, 1H, 6-*H*), 5.24 (d,  $J = 8.0$  Hz, 1H, 9b-*H*), 4.62 (d,  $J = 3.1$  Hz, 1H, 4-*H*), 3.89 – 3.77 (m, 1H, 2-*H*), 3.77 – 3.66 (m, 2H, N-*H* and 2-*H*), 2.81 – 2.68 (m, 1H, 3a-*H*), 2.27 (s, 3H,  $\text{CH}_3$ ), 2.24 – 2.09 (m, 1H, 3-*H*), 1.55 – 1.43 (m, 1H, 3-*H*);  $^{13}\text{C}$  NMR (75 MHz,  $\text{CDCl}_3$ ) selected data for **endo 1b**:  $\delta$  142.5, 141.0, 133.3, 130.5, 129.7, 129.3, 128.9, 128.0, 122.7, 115.2, 76.0, 66.9, 57.3, 45.9, 24.7, 20.7.

#### Synthesis of 4-phenyl-2,3,3a,4,5,9b-hexahydrofuro[3,2-*c*]quinoline **1c**.

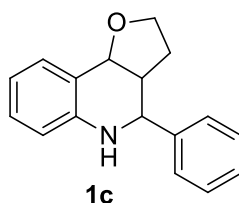

A 2 mL screw-capped vial was equipped with a magnetic stirring bar and charged with GO (5 mg) and  $\text{CH}_3\text{CN}$  (300  $\mu\text{L}$ ). The resulting suspension was sonicated for 2 min, using an ultrasonic bath, then benzaldehyde (26 mg, 25  $\mu\text{L}$ , 0.25 mmol), aniline (30 mg, 30  $\mu\text{L}$ , 0.33 mmol) and 2,3-dihydrofuran (26 mg, 28  $\mu\text{L}$ , 0.38 mmol) were added to the mixture. The sealed reaction vial was stirred at rt for 4 h. After completion of the reaction, the reaction mixture was filtered through a celite cake, washing with DCM/EtOAc 1:1 (15 mL). The filtrate was evaporated to dryness in vacuo and the residue was purified by flash column chromatography ( $\text{SiO}_2$ ), eluting with PE/acetone (95:5 to 85:15) to afford **1c** as a mixture of diastereoisomers (*endo/exo* 79:21) as amber foam (39 mg, 62%). The physical and spectral data agreed with those reported.<sup>6, 7</sup>  $R_f = 0.49$  (PE/acetone 80:20); I.R.:  $\bar{\nu}$  ( $\text{cm}^{-1}$ ) = 3345, 3293, 3059, 3027, 2971, 2939, 2881, 1609, 1588, 1484, 1451, 1368, 1337, 1294, 1253, 1197, 1159, 1143, 1082, 1058, 1038, 1020, 994, 967, 941, 912, 855, 752, 708, 646;  $^1\text{H}$  NMR (400 MHz,  $\text{CDCl}_3$ ) selected data for **endo 1c**:  $\delta$  7.50 – 7.30 (m, 6H, 9-*H* and 5*H*-Ph), 7.10 (t,  $J = 7.6$  Hz, 1H, 7-*H*), 6.83 (td,  $J = 7.5, 1.2$  Hz, 1H, 8-*H*), 6.61 (dd,  $J = 8.1, 1.2$  Hz, 1H, 6-*H*), 5.29 (d,  $J = 8.0$  Hz, 1H, 9b-*H*), 4.71 (d,  $J = 3.1$  Hz, 1H, 4-*H*), 3.90 – 3.78 (m, 2H, N-*H* and 2-*H*), 3.73 (td,  $J = 8.5, 6.8$  Hz, 1H, 2-*H*), 2.85 – 2.74 (m, 1H, 3a-*H*), 2.29 – 2.15 (m, 1H, 3-*H*), 1.53 (dddd,  $J = 11.8, 8.1, 6.9, 3.4$  Hz, 1H, 3-*H*);  $^{13}\text{C}$  NMR (101 MHz,  $\text{CDCl}_3$ ) selected data for **endo 1c**:  $\delta$  145.1, 142.2, 130.2, 128.8, 128.5, 127.8, 126.6, 122.8, 119.3, 115.1, 76.1, 66.9, 57.6, 45.9, 24.8.

#### Synthesis of 4-(naphthalen-1-yl)-2,3,3a,4,5,9b-hexahydrofuro[3,2-*c*]quinoline **1d**.



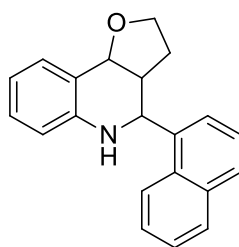

A 2 mL screw-capped vial was equipped with a magnetic stirring bar and charged with GO (5 mg) and CH<sub>3</sub>CN (300  $\mu$ L). The resulting suspension was sonicated for 2 min, using an ultrasonic bath, then 1-naphthaldehyde (39 mg, 34  $\mu$ L, 0.25 mmol), aniline (30 mg, 30  $\mu$ L, 0.33 mmol) and 2,3-dihydrofuran (26 mg, 28  $\mu$ L, 0.38 mmol) were added to the mixture. The sealed reaction vial was stirred at rt for 4 h. After completion of the reaction, the reaction mixture was filtered through a celite cake, washing with DCM/EtOAc 1:1 (15 mL). The filtrate was evaporated to dryness in vacuo and the residue was purified by flash column chromatography (SiO<sub>2</sub>), eluting with PE/acetone (95:5 to 85:15) to afford **1d** as a mixture of diastereoisomers (*endo/exo* 81:19) as white foam (35 mg, 47%); *R*<sub>f</sub> = 0.40 (PE/acetone 80:20); I.R.:  $\bar{\nu}$  (cm<sup>-1</sup>) = 3354, 3312, 3049, 2972, 2931, 2872, 1609, 1589, 1478, 1382, 1339, 1322, 1295, 1257, 1191, 1169, 1156, 1138, 1061, 1026, 979, 908, 802, 782, 749, 641; <sup>1</sup>H NMR (300 MHz, CDCl<sub>3</sub>) selected data for **endo 1d**:  $\delta$  8.13 – 8.05 (m, 1H, 1*H*-Ar), 7.96 – 7.81 (m, 3H, 3*H*-Ar), 7.61 – 7.48 (m, 3H, 3*H*-Ar), 7.41 (dd, *J* = 7.7, 1.6 Hz, 1H, 9-*H*), 7.13 (t, *J* = 7.6 Hz, 1H, 7-*H*), 6.86 (td, *J* = 7.4, 1.2 Hz, 1H, 8-*H*), 6.68 (dd, *J* = 8.0, 1.2 Hz, 1H, 6-*H*), 5.53 (d, *J* = 2.7 Hz, 1H, 4-*H*), 5.40 (d, *J* = 8.1 Hz, 1H, 9b-*H*), 3.90 – 3.76 (m, 2H, N-*H* and 2-*H*), 3.67 (td, *J* = 8.6, 6.7 Hz, 1H, 2-*H*), 3.17 – 3.02 (m, 1H, 3a-*H*), 2.32 – 2.14 (m, 1H, 3-*H*), 1.35 (dddd, *J* = 12.0, 8.4, 6.8, 3.5 Hz, 1H, 3-*H*); <sup>13</sup>C NMR (75 MHz, CDCl<sub>3</sub>) selected data for **endo 1d**:  $\delta$  145.7, 137.7, 134.0, 130.4, 129.3, 128.6, 128.2, 126.5, 125.9, 125.7(x2), 123.2, 123.2, 122.3, 119.5, 115.39, 76.1, 67.0, 53.4, 43.9, 25.3.

#### Synthesis of 8-fluoro-4-phenyl-2,3,3a,4,5,9b-hexahydrofuro[3,2-c]quinoline 1e.

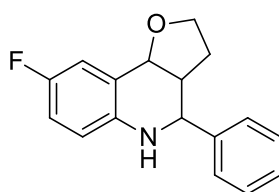

A 2 mL screw-capped vial was equipped with a magnetic stirring bar and charged with GO (5 mg) and CH<sub>3</sub>CN (300  $\mu$ L). The resulting suspension was sonicated for 2 min, using an ultrasonic bath, then benzaldehyde (26 mg, 25  $\mu$ L, 0.25 mmol), 4-fluoroaniline (36 mg, 31  $\mu$ L, 0.33 mmol) and 2,3-dihydrofuran (26 mg, 28  $\mu$ L, 0.38 mmol) were added to the mixture. The sealed reaction vial was stirred at rt for 4 h. After completion of the reaction, the reaction mixture was filtered through a

celite cake, washing with DCM/EtOAc 1:1 (15 mL). The filtrate was evaporated to dryness in vacuo and the residue was purified by flash column chromatography (SiO<sub>2</sub>), eluting with PE/acetone (95:5 to 85:15) to afford **1e** as a mixture of diastereoisomers (*endo/exo* 82:18) as yellow foam (35 mg, 52%); *R*<sub>f</sub> = 0.27 (PE/acetone 90:10); I.R.:  $\bar{\nu}$  (cm<sup>-1</sup>) = 3371, 3291, 3032, 2974, 2921, 2888, 1601, 1496, 1479, 1451, 1368, 1356, 1333, 1315, 1298, 1248, 1213, 1150, 1136, 1092, 1058, 1028, 997, 979, 937, 923, 875, 808, 776, 734, 705; <sup>1</sup>H NMR (400 MHz, CDCl<sub>3</sub>) selected data for **endo 1e**:  $\delta$  7.48 – 7.30 (m, 5H, Ph), 7.07 (ddd, *J* = 9.2, 2.9, 0.7 Hz, 1H, 9-*H*), 6.81 (td, *J* = 8.5, 3.0 Hz, 1H, 7-*H*), 6.54 (dd, *J* = 8.8, 4.6 Hz, 1H, 6-*H*), 5.23 (d, *J* = 7.9 Hz, 1H, 9b-*H*), 4.66 (d, *J* = 3.0 Hz, 1H, 4-*H*), 3.88 – 3.69 (m, 3H, N-*H* and 2-CH<sub>2</sub>), 2.84 – 2.71 (m, 1H, 3a-*H*), 2.26 – 2.12 (m, 1H, 3-*H*), 1.53 (dddd, *J* = 11.9, 8.2, 6.9, 3.4 Hz, 1H, 3-*H*); <sup>13</sup>C NMR (101 MHz, CDCl<sub>3</sub>) selected data for **endo 1e**:  $\delta$  156.7, 142.1, 141.2, 128.8, 128.4, 127.9, 126.6, 116.0, 115.9, 115.5, 75.9, 67.1, 57.8, 45.6, 24.5.

#### Synthesis of 1-phenyl-1,2,3a,10,11,11a-hexahydrobenzo[h]furo[3,2-c]quinoline **1f**

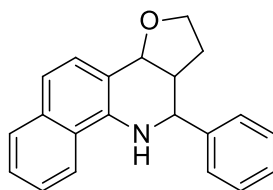

A 2 mL screw-capped vial was equipped with a magnetic stirring bar and charged with GO (5 mg) and CH<sub>3</sub>CN (300  $\mu$ L). The resulting suspension was sonicated for 2 min, using an ultrasonic bath, then benzaldehyde (26 mg, 25  $\mu$ L, 0.25 mmol), 1-naphthylamine (47 mg, 0.33 mmol) and 2,3-dihydrofuran (26 mg, 28  $\mu$ L, 0.38 mmol) were added to the mixture. The sealed reaction vial was stirred at rt for 24 h. After completion of the reaction, the reaction mixture was filtered through a celite cake, washing with DCM/EtOAc 1:1 (15 mL). The filtrate was evaporated to dryness in vacuo and the residue was purified by flash column chromatography (SiO<sub>2</sub>), eluting with PE/acetone (95:5 to 80:20) to afford **1f** as a mixture of diastereoisomers (*endo/exo* 46:54) as pink foam (22 mg, 29%);

*R*<sub>f</sub> = 0.54 (PE/acetone 80:20); I.R.:  $\bar{\nu}$  (cm<sup>-1</sup>) = 3356, 3057, 2930, 2872, 1626, 1576, 1520, 1463, 1453, 1407, 1366, 1339, 1317, 1297, 1145, 1090, 1038, 952, 907, 857, 803, 764, 732, 700, 662; <sup>1</sup>H NMR (300 MHz, CDCl<sub>3</sub>)  $\delta$  7.84 – 7.29 (m, 22H, aromatics, *endo* and *exo*), 5.49 (d, *J* = 7.8 Hz, 1H, 9b-*H* of *endo*), 4.90 (brs, 1H, N-*H*, *exo*), 4.83 (d, *J* = 3.0 Hz, 1H, 4-*H*, *endo*), 4.73 (d, *J* = 5.0 Hz, 1H, 9b-*H*, *exo*), 4.58 (brs, 1H, N-*H*, *endo*), 4.09 (td, *J* = 8.5, 5.9 Hz, 1H, 2-*H*, *exo*), 3.95 – 3.85 (m, 2H, 2-*H* and 4-*H*, *exo*), 3.81 – 3.74 (m, 2H, 2-CH<sub>2</sub>, *endo*), 2.95 – 2.82 (m, 1H, 3a-*H*, *endo*), 2.56 (dddd, *J* = 11.1,

7.6, 5.1, 2.1 Hz, 1H, 3a-*H*, *exo*), 2.10 (dddd,  $J = 13.1, 9.2, 8.0, 5.9$  Hz, 1H, 3-*H*, *exo*), 2.35 – 2.24 (m, 1H, 3-*H*, *endo*), 1.85 – 1.72 (m, 1H, 3-*H*, *exo*), 1.61 (dddd,  $J = 12.5, 8.3, 6.1, 4.5$  Hz, 1H, 3-*H*, *endo*).  $^{13}\text{C}$  NMR (75 MHz,  $\text{CDCl}_3$ )  $\delta$  142.5, 141.8, 140.8, 139.6, 134.2, 133.8, 128.95, 128.93, 128.9, 128.8, 128.7, 128.6, 128.4, 128.0, 127.6, 126.9, 126.1, 126.0, 125.3, 125.1, 122.9, 122.9, 120.2, 120.0, 119.0, 118.2, 116.8, 114.3, 76.8 (*endo*), 76.7 (*exo*), 66.8 (*endo*), 65.4 (*exo*), 58.2 (*exo*), 57.7 (*endo*), 45.5 (*endo*), 43.1 (*exo*), 29.0 (*exo*), 24.6 (*endo*).

#### Synthesis of 4-(*p*-tolyl)-2,3,3a,4,5,9b-hexahydrofuro[3,2-*c*]quinoline **1g**.

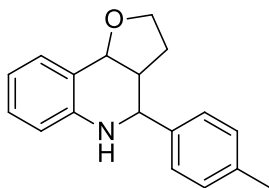

A 2 mL screw-capped vial was equipped with a magnetic stirring bar and charged with GO (5 mg) and  $\text{CH}_3\text{CN}$  (300  $\mu\text{L}$ ). The resulting suspension was sonicated for 2 min, using an ultrasonic bath, then *p*-tolualdehyde (30 mg, 29  $\mu\text{L}$ , 0.25 mmol), aniline (30 mg, 30  $\mu\text{L}$ , 0.33 mmol) and 2,3-dihydrofuran (26 mg, 28  $\mu\text{L}$ , 0.38 mmol) were added to the mixture. The sealed reaction vial was stirred at rt for 4 h. After completion of the reaction, the reaction mixture was filtered through a celite cake, washing with DCM/EtOAc 1:1 (15 mL). The filtrate was evaporated to dryness in vacuo and the residue was purified by flash column chromatography ( $\text{SiO}_2$ ), eluting with PE/acetone (95:5 to 85:15) to afford **1g** as a mixture of diastereoisomers (*endo/exo* 85:15) as white foam (44 mg, 66%). The physical and spectral data agreed with those reported;<sup>8</sup>  $R_f = 0.48$  (PE/acetone 80:20); I.R.:  $\bar{\nu}$  ( $\text{cm}^{-1}$ ) = 3367, 3327, 3052, 3027, 2978, 2936, 2883, 1905, 1796, 1609, 1587, 1515, 1488, 1469, 1420, 1364, 1336, 1318, 1296, 1253, 1186, 1147, 1129, 1112, 1087, 1049, 1038, 1020, 995, 971, 942, 911, 849, 820, 748, 685, 634;  $^1\text{H}$  NMR (400 MHz,  $\text{CDCl}_3$ ) selected data for **endo 1g**:  $\delta$  7.38 – 7.32 (m, 3H, 9-*H* and 2*H*-Ar), 7.24 – 7.18 (m, 2H, 2*H*-Ar), 7.09 (t,  $J = 7.8$  Hz, 1H, 7-*H*), 6.82 (td,  $J = 7.4, 1.1$  Hz, 1H, 8-*H*), 6.60 (dd,  $J = 8.1, 1.2$  Hz, 1H, 6-*H*), 5.28 (d,  $J = 8.0$  Hz, 1H, 9b-*H*), 4.67 (d,  $J = 3.0$  Hz, 1H, 4-*H*), 3.88 – 3.78 (m, 2H, N-*H* and 2-*H*), 3.72 (td,  $J = 8.5, 6.8$  Hz, 1H, 2-*H*), 2.82 – 2.73 (m, 1H, 3a-*H*), 2.38 (s, 3H,  $\text{CH}_3$ ), 2.28 – 2.16 (m, 1H, 3-*H*), 1.55 (dddd,  $J = 11.8, 8.1, 6.8, 3.4$  Hz, 1H, 3-*H*);  $^{13}\text{C}$  NMR (101 MHz,  $\text{CDCl}_3$ ) selected data for **endo 1g**:  $\delta$  145.2, 139.3, 137.5, 130.2, 129.4, 128.4, 126.6, 122.8, 119.2, 115.0, 76.1, 57.4, 45.9, 24.8, 21.2.

#### Synthesis of 4-(4-methoxyphenyl)-2,3,3a,4,5,9b-hexahydrofuro[3,2-*c*]quinoline **1h**.

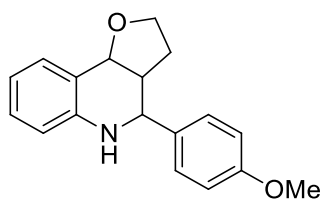

A 2 mL screw-capped vial was equipped with a magnetic stirring bar and charged with GO (5 mg) and CH<sub>3</sub>CN (300  $\mu$ L). The resulting suspension was sonicated for 2 min, using an ultrasonic bath, then 4-methoxybenzaldehyde (34 mg, 30  $\mu$ L, 0.25 mmol), aniline (30 mg, 30  $\mu$ L, 0.33 mmol) and 2,3-dihydrofuran (26 mg, 28  $\mu$ L, 0.38 mmol) were added to the mixture. The sealed reaction vial was stirred at rt for 4 h. After completion of the reaction, the reaction mixture was filtered through a celite cake, washing with DCM/EtOAc 1:1 (15 mL). The filtrate was evaporated to dryness in vacuo and the residue was purified by flash column chromatography (SiO<sub>2</sub>), eluting with PE/acetone (95:5 to 85:15) to afford **1h** as a mixture of diastereoisomers (*endo/exo* 85:15) as white foam (50 mg, 71%). The physical and spectral data agreed with those reported;<sup>8</sup>  $R_f$  = 0.31 (PE/acetone 80:20); I.R.:  $\bar{\nu}$  (cm<sup>-1</sup>) = 3349, 2968, 2925, 2877, 2835, 1606, 1587, 1512, 1479, 1452, 1436, 1366, 1331, 1290, 1240, 1175, 1156, 1111, 1065, 1027, 994, 967, 928, 828, 796, 775, 749, 696, 638; <sup>1</sup>H NMR (400 MHz, CDCl<sub>3</sub>) selected data for **endo 1h**:  $\delta$  7.44 – 7.33 (m, 3H, 9-*H*, 2*H*-Ar), 7.09 (t, 1H, 7-*H*), 6.96 – 6.88 (m, 2*H*, 2*H*-Ar), 6.81 (td,  $J$  = 7.4, 1.2 Hz, 1H, 8-*H*), 6.59 (dd,  $J$  = 8.1, 1.1 Hz, 1H, 6-*H*), 5.27 (d,  $J$  = 7.9 Hz, 1H, 9*b*-*H*), 4.65 (d,  $J$  = 3.0 Hz, 1H, 4-*H*), 3.88 – 3.79 (m, 5H, CH<sub>3</sub>, N-*H* and 2-*H*), 3.72 (td,  $J$  = 8.6, 6.8 Hz, 1H, 2-*H*), 2.82 – 2.68 (m, 1H, 3*a*-*H*), 2.30 – 2.12 (m, 1H, 3-*H*), 1.62 – 1.49 (m, 1H, 3-*H*); <sup>13</sup>C NMR (101 MHz, CDCl<sub>3</sub>) selected data for **endo 1h**:  $\delta$  159.2, 145.2, 134.4, 130.3, 128.5, 127.8, 122.8, 119.2, 115.0, 114.1, 76.1, 67.0, 57.1, 55.5, 46.1, 24.8.

#### Synthesis of 4-(2-(benzyloxy)phenyl)-2,3,3*a*,4,5,9*b*-hexahydrofuro[3,2-*c*]quinoline **1i**

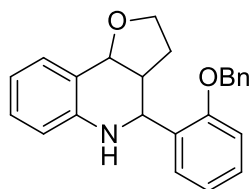

A 5 mL screw-capped vial was equipped with a magnetic stirring bar and charged with GO (20 mg) and CH<sub>3</sub>CN (1 mL). The resulting suspension was sonicated for 2 min, using an ultrasonic bath, then 2-benzyloxybenzaldehyde (212 mg, 158  $\mu$ L, 1.00 mmol), aniline (121 mg, 118  $\mu$ L, 1.30 mmol) and 2,3-dihydrofuran (105 mg, 113  $\mu$ L, 1.50 mmol) were added to the mixture. The sealed reaction vial was stirred at rt for 24 h. After completion of the reaction, the reaction mixture was filtered through a celite cake, washing with DCM/EtOAc 1:1 (30 mL). The filtrate was evaporated to

dryness in vacuo and the residue was purified by flash column chromatography (SiO<sub>2</sub>), eluting with PE/acetone (95:5 to 80:20) to afford **1i** as a mixture of diastereoisomers (*endo/exo* 60:40) as white foam (64 mg, 60%). The diastereoisomers were separated by a second flash column chromatography, eluting with PE/EtOAc (95:5 to 90:10) to afford **endo 1i** (128 mg, 36%) as white solid and then **exo 1i** (86 mg, 24%) as white foam; **endo 1i**: mp 119-121°C (DCM); *R*<sub>f</sub> = 0.35 (PE/EtOAc 90:10); I.R.:  $\bar{\nu}$  (cm<sup>-1</sup>) = 3335, 3045, 2960, 2922, 2896, 1629, 1599, 1551, 1492, 1452, 1400, 1375, 1336, 1283, 1240, 1164, 1114, 1079, 1025, 1001, 971, 927, 910, 864, 802, 753, 704, 670, 644, 620; <sup>1</sup>H NMR (300 MHz, CDCl<sub>3</sub>)  $\delta$  7.68 (dd, *J* = 7.8, 1.8 Hz, 1H, 1*H*-Ar), 7.47 – 7.25 (m, 7H, 5*H*-benzyl, 1*H*-Ar, 9-*H*), 7.13 – 6.97 (m, 3H, 2*H*-Ar and 7-*H*), 6.82 (td, *J* = 7.4, 1.2 Hz, 1H, 8-*H*), 6.61 (dd, *J* = 8.0, 1.2 Hz, 1H, 6-*H*), 5.26 (d, *J* = 8.1 Hz, 1H, 9*b*-*H*), 5.21 – 5.06 (m, 3H, 4-*H* and CH<sub>2</sub> of benzyl), 3.83 (td, *J* = 8.5, 3.6 Hz, 1H, 2-*H*), 3.78 – 3.67 (m, 2H, N-*H* and 2-*H*), 3.12 – 2.97 (m, 1H, 3*a*-*H*), 2.27 – 2.10 (m, 1H, 3-*H*), 1.51 (dddd, *J* = 12.1, 8.3, 6.9, 3.6 Hz, 1H, 3-*H*); <sup>13</sup>C NMR (75 MHz, CDCl<sub>3</sub>)  $\delta$  155.5, 145.7, 137.0, 130.8, 130.3, 128.8, 128.4, 128.3, 128.1, 127.1, 126.7, 123.1, 121.1, 119.2, 115.2, 111.7, 76.0, 70.0, 66.9, 51.0, 42.5, 25.1; Anal. Calcd. for C<sub>24</sub>H<sub>23</sub>NO<sub>2</sub>: % C 80.64; H 6.49; N 3.92; O 8.95, found: C 80.70; H 6.52; N 3.80; O 8.96; **exo 1i**: *R*<sub>f</sub> = 0.29 (PE/EtOAc 90:10); I.R.:  $\bar{\nu}$  (cm<sup>-1</sup>) = 3372, 3326, 3032, 2926, 2857, 1602, 1587, 1488, 1451, 1364, 1287, 1237, 1158, 1086, 1039, 909, 852, 796, 748, 696, 633; <sup>1</sup>H NMR (300 MHz, CDCl<sub>3</sub>)  $\delta$  7.58 (dd, *J* = 7.6, 1.8 Hz, 1H, 1*H*-Ar), 7.46 – 7.26 (m, 7H, 5*H*-benzyl, 1*H*-Ar and 9-*H*), 7.16 – 7.00 (m, 3H, 2*H*-Ar and 7-*H*), 6.79 (td, *J* = 7.4, 1.2 Hz, 1H, 8-*H*), 6.60 (dd, *J* = 8.1, 1.1 Hz, 1H, 6-*H*), 5.11 (s, 2H, CH<sub>2</sub>-benzyl), 4.64 (d, *J* = 5.0 Hz, 1H, 9*b*-*H*), 4.57 (d, *J* = 11.0 Hz, 1H, 4-*H*), 4.07 (brs, 1H, N-*H*), 3.98 – 3.87 (m, 1H, 2-*H*), 3.82 (ddd, *J* = 9.3, 8.3, 5.4 Hz, 1H, 2-*H*), 2.51 (dddd, *J* = 11.0, 7.5, 5.0, 2.1 Hz, 1H, 3*a*-*H*), 2.06 (dddd, *J* = 12.8, 9.2, 7.8, 6.9 Hz, 1H, 3-*H*), 1.85 (dddd, *J* = 13.0, 7.8, 5.4, 2.1 Hz, 1H, 3-*H*); <sup>13</sup>C NMR (75 MHz, CDCl<sub>3</sub>)  $\delta$  156.8, 145.9, 136.8, 131.2, 130.8, 128.9, 128.79, 128.77, 128.6, 128.2, 127.5, 121.6, 120.3, 118.3, 114.9, 112.2, 76.3, 70.5, 65.6, 49.1, 43.4, 29.1; Anal. Calcd. for C<sub>24</sub>H<sub>23</sub>NO<sub>2</sub>: % C 80.64; H 6.49; N 3.92; O 8.95, found: C 80.72; H 6.54; N 3.85; O 8.85.

#### Synthesis of 4-cyclopropyl-2,3,3*a*,4,5,9*b*-hexahydrofuro[3,2-*c*]quinoline **1j**

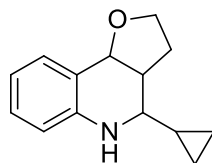

A 2 mL screw-capped vial was equipped with a magnetic stirring bar and charged with GO (5 mg) and CH<sub>3</sub>CN (300  $\mu$ L). The resulting suspension was sonicated for 2 min, using an ultrasonic bath, then cyclopropanecarboxaldehyde (18 mg, 19  $\mu$ L, 0.25 mmol), aniline (30 mg, 30  $\mu$ L, 0.33 mmol)

and 2,3-dihydrofuran (26 mg, 28  $\mu$ L, 0.38 mmol) were added to the mixture. The sealed reaction vial was stirred at rt for 24 h. After completion of the reaction, the reaction mixture was filtered through a celite cake, washing with DCM/EtOAc 1:1 (15 mL). The filtrate was evaporated to dryness in vacuo and the residue was purified by flash column chromatography ( $\text{SiO}_2$ ), eluting with PE/acetone (95:5 to 85:15) to afford **endo 1j** (25 mg, 47%) as white solid and **exo 1j** (6 mg, 11%) as white foam. The ratio *endo/exo* was determined by  $^1\text{H}$  NMR of the crude and resulted 80:20; **endo 1j**: mp 130-133°C (DCM);  $R_f$  = 0.40 (PE/EtOAc 90:10); I.R.:  $\bar{\nu}$  ( $\text{cm}^{-1}$ ) = 3314, 3079, 3061, 3007, 2977, 2952, 2928, 1607, 1590, 1500, 1490, 1452, 1428, 1397, 1363, 1328, 1300, 1268, 1257, 1201, 1148, 1115, 1059, 1045, 1034, 1023, 1015, 1005, 973, 937, 926, 911, 876, 826, 784, 752, 704, 672;  $^1\text{H}$  NMR (300 MHz,  $\text{CDCl}_3$ )  $\delta$  7.29 (dd,  $J$  = 7.7, 1.6 Hz, 1H, 9-*H*), 7.04 (td,  $J$  = 7.7, 1.6 Hz, 1H, 7-*H*), 6.74 (td,  $J$  = 7.4, 1.2 Hz, 1H, 8-*H*), 6.53 (dd,  $J$  = 8.1, 1.2 Hz, 1H, 6-*H*), 5.08 (d,  $J$  = 8.0 Hz, 1H, 9b-*H*), 3.87 – 3.79 (m, 2H, 2- $\text{CH}_2$ ), 3.77 (brs, 1H, N-*H*), 2.81 – 2.68 (m, 1H, 3a-*H*), 2.50 (dd,  $J$  = 9.6, 3.0 Hz, 1H, 4-*H*), 2.26 – 2.10 (m, 1H, 3-*H*), 2.10 – 1.94 (m, 1H, 3-*H*), 1.06 – 0.92 (m, 1H, CH-cyclopropyl), 0.67 – 0.51 (m, 2H,  $\text{CH}_2$ -cyclopropyl), 0.32 – 0.17 (m, 2H,  $\text{CH}_2$ -cyclopropyl);  $^{13}\text{C}$  NMR (75 MHz,  $\text{CDCl}_3$ )  $\delta$  145.1, 130.2, 128.4, 122.8, 118.7, 114.5, 75.9, 66.8, 59.1, 43.0, 25.0, 15.1, 3.6, 2.1; Anal. Calcd. for  $\text{C}_{14}\text{H}_{17}\text{NO}$ : % C 78.10; H 7.96; N 6.51; O 7.43, found: C 78.16; H 8.05; N 6.53; O 7.43; **exo 1j**:  $R_f$  = 0.34 (PE/EtOAc 90:10); I.R.:  $\bar{\nu}$  ( $\text{cm}^{-1}$ ) = 3327, 3075, 2996, 2928, 2861, 2810, 2762, 1610, 1587, 1492, 1453, 1365, 1301, 1265, 1199, 1138, 1104, 1028, 996, 979, 918, 881, 826, 748, 647;  $^1\text{H}$  NMR (400 MHz,  $\text{CDCl}_3$ ) 7.33 (dd,  $J$  = 7.6, 1.3 Hz, 1H, 9-*H*), 7.09 (t,  $J$  = 7.4 Hz, 1H, 7-*H*), 6.74 (td,  $J$  = 7.5, 1.2 Hz, 1H, 8-*H*), 6.63 (dd,  $J$  = 8.0, 0.8 Hz, 1H, 6-*H*), 4.57 (d,  $J$  = 5.2 Hz, 1H, 9b-*H*), 4.08 (brs, 1H, N-*H*), 3.95 – 3.78 (m, 2H, 2- $\text{CH}_2$ ), 2.35 – 2.28 (m, 1H, 3a-*H*), 2.26 – 2.18 (m, 2H, 3- $\text{CH}_2$ ), 2.02 (t,  $J$  = 9.7 Hz, 1H, 4-*H*), 0.93 (dt,  $J$  = 9.1, 8.1, 5.1 Hz, 1H, CH-cyclopropyl), 0.72 (dddd,  $J$  = 8.9, 8.0, 5.8, 4.5 Hz, 1H, 1H of  $\text{CH}_2$ -cyclopropyl), 0.53 (dddd,  $J$  = 8.8, 7.9, 5.5, 4.2 Hz, 1H, 1H of  $\text{CH}_2$ -cyclopropyl), 0.48 – 0.39 (m, 1H, 1H of  $\text{CH}_2$ -cyclopropyl), 0.25 – 0.16 (m, 1H, 1H of  $\text{CH}_2$ -cyclopropyl);  $^{13}\text{C}$  NMR (101 MHz,  $\text{CDCl}_3$ )  $\delta$  145.2, 131.1, 129.0, 120.5, 118.2, 114.7, 76.3, 65.4, 57.24, 43.3, 28.7, 16.1, 4.5, 1.1; , 2.1; Anal. Calcd. for  $\text{C}_{14}\text{H}_{17}\text{NO}$ : % C 78.10; H 7.96; N 6.51; O 7.43, found: C 78.12; H 8.01; N 6.52; O 7.43.

#### Synthesis of 4-isopropyl-2,3,3a,4,5,9b-hexahydrofuro[3,2-*c*]quinoline 1k

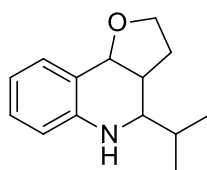

A 2 mL screw-capped vial was equipped with a magnetic stirring bar and charged with GO (5 mg) and CH<sub>3</sub>CN (300  $\mu$ L). The resulting suspension was sonicated for 2 min, using an ultrasonic bath, then isobutyraldehyde (18 mg, 23  $\mu$ L, 0.25 mmol), aniline (30 mg, 30  $\mu$ L, 0.33 mmol) and 2,3-dihydrofuran (26 mg, 28  $\mu$ L, 0.38 mmol) were added to the mixture. The sealed reaction vial was stirred at rt for 24 h. After completion of the reaction, the reaction mixture was filtered through a celite cake, washing with DCM/EtOAc 1:1 (15 mL). The filtrate was evaporated to dryness in vacuo and the residue was purified by flash column chromatography (SiO<sub>2</sub>), eluting with PE/acetone (95:5) to afford **endo 1k** (27mg, 50%) as amorphous solid and then **1k** as a mixture of diastereoisomers (*endo/exo* 50:50) as white foam (7 mg, 13%). The physical and spectral data agreed with those reported;<sup>9</sup> **endo 1k**: *R*<sub>f</sub> = 0.41 (PE/EtOAc 90:10); I.R.:  $\bar{\nu}$  (cm<sup>-1</sup>) = 3348, 3059, 3021, 2957, 2885, 1609, 1591, 1489, 1469, 1387, 1365, 1333, 1304, 1288, 1256, 1245, 1198, 1156, 1142, 1095, 1061, 1035, 1020, 971, 936, 910, 849, 801, 750, 705, 639; <sup>1</sup>H NMR (300 MHz, CDCl<sub>3</sub>):  $\delta$  7.29 (dd, *J* = 7.6, 1.6 Hz, 1H, 9-*H*), 7.04 (t, *J* = 7.6, 1H, 7-*H*), 6.74 (td, *J* = 7.4, 1.2 Hz, 1H, 8-*H*), 6.53 (dd, *J* = 8.1, 1.2 Hz, 1H, 6-*H*), 5.12 (d, *J* = 8.0 Hz, 1H, 9b-*H*), 3.85 – 3.73 (m, 2H, 2-CH<sub>2</sub>), 3.69 (brs, 1H, N-*H*), 3.04 (dd, *J* = 9.1, 2.8 Hz, 1H, 4-*H*), 2.82 – 2.69 (m, 1H, 3a-*H*), 2.10 – 1.94 (m, 1H, 3-*H*), 1.91 – 1.79 (m, 1H, 3-*H*), 1.78 – 1.64 (m, 1H, CH-(CH<sub>3</sub>)<sub>2</sub>), 1.06 (d, *J* = 6.5 Hz, 3H, CH<sub>3</sub>), 1.02 (d, *J* = 6.8 Hz, 3H, CH<sub>3</sub>); <sup>13</sup>C NMR (75 MHz, CDCl<sub>3</sub>):  $\delta$  145.2, 130.0, 128.3, 122.8, 118.8, 114.6, 76.1, 66.6, 59.0, 40.8, 31.3, 23.9, 20.0, 19.2; Anal. Calcd. for C<sub>14</sub>H<sub>19</sub>NO: % C 77.38; H 8.81; N 6.45; O 7.36, found: C 77.43; H 8.65; N 6.42; O 7.69.

#### Synthesis of (E)-4-styryl-2,3,3a,4,5,9b-hexahydrofuro[3,2-c]quinoline 1l.

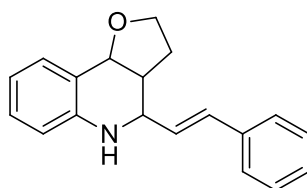

A 2 mL screw-capped vial was equipped with a magnetic stirring bar and charged with GO (10 mg) and CH<sub>3</sub>CN (600  $\mu$ L). The resulting suspension was sonicated for 2 min, using an ultrasonic bath, then *trans*-cinnamaldehyde (66 mg, 63  $\mu$ L, 0.50 mmol), aniline (61 mg, 59  $\mu$ L, 0.65 mmol) and 2,3-dihydrofuran (53 mg, 57  $\mu$ L, 0.75 mmol) were added to the mixture. The sealed reaction vial was stirred at rt for 24 h. After completion of the reaction, the reaction mixture was filtered through a celite cake, washing with DCM/EtOAc 1:1 (15 mL). The filtrate was evaporated to dryness in vacuo and the residue was purified by flash column chromatography (SiO<sub>2</sub>), eluting with PE/acetone (95:5 to 85:15) to afford **1l** as a mixture of diastereoisomers (*endo/exo* 83:17) as

yellow foam (69 mg, 50%). The physical and spectral data agreed with those reported;<sup>10</sup>  $R_f$  = 0.42 (PE/acetone 80:20); I.R.:  $\bar{\nu}$  ( $\text{cm}^{-1}$ ) = 3373, 3326, 3024, 2970, 2925, 2873, 1674, 1609, 1589, 1479, 1449, 1364, 1293, 1259, 1190, 1155, 1127, 1062, 1038, 1026, 967, 908, 748, 728, 691, 646;  $^1\text{H}$  NMR (400 MHz,  $\text{CDCl}_3$ ) selected data for **endo 1l**:  $\delta$  7.46 – 7.27 (m, 6H, 5H-Ar and 9-H), 7.09 (t,  $J$  = 7.6 Hz, 1H, 7-H), 6.80 (td,  $J$  = 7.5, 1.2 Hz, 1H, 8-H), 6.64 (d,  $J$  = 16.0 Hz, 1H, 1H-styryl), 6.58 (dd,  $J$  = 8.0, 1.1 Hz, 1H, 6-H), 6.30 (dd,  $J$  = 15.9, 7.9 Hz, 1H, 1H-styryl), 5.08 (d,  $J$  = 7.3 Hz, 1H, 9b-H), 4.16 (ddd,  $J$  = 7.9, 3.7, 1.0 Hz, 1H, 4-H), 3.86 – 3.77 (m, 3H, 2- $\text{CH}_2$  and N-H), 2.79 – 2.70 (m, 1H, 3a-H), 2.18 – 2.11 (m, 1H, 3-H), 2.06 – 1.98 (m, 1H, 3-H);  $^{13}\text{C}$  NMR (101 MHz,  $\text{CDCl}_3$ ) selected data for **endo 1l**:  $\delta$  144.4, 136.7, 131.6, 130.5, 129.8, 128.8, 128.7, 127.9, 126.6, 122.1, 119.1, 115.0, 75.5, 66.6, 55.9, 42.8, 25.7.

#### Synthesis of 4-ethoxy-2-phenyl-1,2,3,4-tetrahydroquinoline 1m

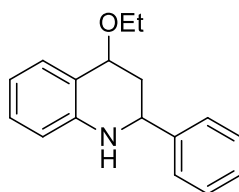

A 2 mL screw-capped vial was equipped with a magnetic stirring bar and charged with GO (10 mg) and  $\text{CH}_3\text{CN}$  (600  $\mu\text{L}$ ). The resulting suspension was sonicated for 2 min, using an ultrasonic bath, then using benzaldehyde (26 mg, 25  $\mu\text{L}$ , 0.25 mmol), aniline (30 mg, 30  $\mu\text{L}$ , 0.33 mmol) and ethyl vinyl ether (27 mg, 36  $\mu\text{L}$ , 0.38 mmol) were added to the mixture. The sealed reaction vial was stirred at rt for 24 h. After completion of the reaction, the mixture was filtered through a celite cake, washing with DCM/EtOAc 1:1 (15 mL). The filtrate was evaporated to dryness in vacuo and the residue was purified by flash column chromatography ( $\text{SiO}_2$ ), eluting with PE/EtOAc (95:5 to 90:10) to afford **1m** as a mixture of diastereoisomers (*endo/exo* 95:5) as a white foam (32 mg, 51%). The physical and spectral data agreed with those reported;  $R_f$  = 0.31 (PE/EtOAc 95:5); I.R.:  $\bar{\nu}$  ( $\text{cm}^{-1}$ ) = 3340, 3061, 3030, 2973, 694, 642, 6152926, 2849, 1608, 1582, 1488, 1452, 1358, 1338, 1310, 1262, 1210, 1174, 1119, 1086, 1028, 947, 907, 863, 843, 775, 747, 722;  $^1\text{H}$  NMR (400 MHz,  $\text{CDCl}_3$ ) selected data for **endo 1m**:  $\delta$  7.50 – 7.29 (m, 6H, 9-H, 5H-Ar), 7.06 (t,  $J$  = 7.6 Hz, 1H, 7-H), 6.76 (td,  $J$  = 7.5, 1.2 Hz, 1H, 8-H), 6.53 (dd,  $J$  = 8.0, 1.2 Hz, 1H, 6-H), 4.83 (dd,  $J$  = 10.6, 5.6 Hz, 1H, 2-H), 4.54 (dd,  $J$  = 11.6, 2.7 Hz, 1H, 4-H), 3.95 (brs, 1H, N-H), 3.71 (dq,  $J$  = 9.0, 6.9 Hz, 1H,  $\text{CH}_2$  of ethyl), 3.58 (dq,  $J$  = 9.0, 7.0 Hz, 1H,  $\text{CH}_2$  of ethyl), 2.43 (ddd,  $J$  = 12.3, 5.7, 2.7 Hz, 1H, 3-H), 2.09 (ddd,  $J$  = 12.4, 11.6, 10.6 Hz, 1H, 3-H), 1.27 (t,  $J$  = 7.0 Hz, 3H,  $\text{CH}_3$  of ethyl);  $^{13}\text{C}$  NMR (101 MHz,



CDCl<sub>3</sub>) selected data for **endo 1m**:  $\delta$  144.7, 143.8, 128.8, 128.4, 127.9, 127.4, 126.8, 122.7, 117.9, 114.2, 74.1, 63.6, 56.0, 37.2, 15.8.

#### Synthesis of 4-ethoxy-2-(4-methoxyphenyl)-1,2,3,4-tetrahydroquinoline 1n

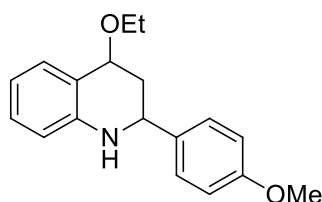

A 2 mL screw-capped vial was equipped with a magnetic stirring bar and charged with GO (5 mg) and CH<sub>3</sub>CN (300  $\mu$ L). The resulting suspension was sonicated for 2 min, using an ultrasonic bath, then 4-methoxybenzaldehyde (34 mg, 30  $\mu$ L, 0.25 mmol), aniline (30 mg, 30  $\mu$ L, 0.33 mmol) and ethyl vinyl ether (27 mg, 36  $\mu$ L, 0.38 mmol) were added to the mixture. The sealed reaction vial was stirred at rt for 48 h. After this time, the reaction mixture was filtered through a celite cake, washing with DCM/EtOAc 1:1 (15 mL). The filtrate was evaporated to dryness in vacuo and the residue was purified by flash column chromatography (SiO<sub>2</sub>), eluting with PE/acetone (95:5 to 90:10) to afford **1n** as a mixture of diastereoisomers (*endo/exo* 75:25) as white foam (45 mg, 64%); **endo 1n** was separated by a second flash column chromatography, eluting with PE/EtOAc (95:5). The physical and spectral data agreed with those reported.<sup>11</sup> **endo 1n**:  $R_f$  = 0.40 (PE/EtOAc 80:20); I.R.:  $\bar{\nu}$  (cm<sup>-1</sup>) = 3363, 3346, 3058, 3032, 2970, 2933, 2897, 2869, 2835, 1606, 1583, 1511, 1488, 1464, 1441, 1370, 1333, 1311, 1297, 1264, 1241, 1176, 1110, 1083, 1064, 1028, 945, 904, 864, 825, 780, 768, 746, 722, 672, 632, 607; <sup>1</sup>H NMR (300 MHz, CDCl<sub>3</sub>):  $\delta$  7.43 – 7.32 (m, 3H, 9-*H*, 2*H*-Ar), 7.05 (t,  $J$  = 7.6 Hz, 1H, 7-*H*), 6.93 – 6.88 (m, 2H, 2*H*-Ar), 6.74 (td,  $J$  = 7.4, 1.2 Hz, 1H, 8-*H*), 6.50 (dd,  $J$  = 7.9, 1.2 Hz, 1H, 6-*H*), 4.87 – 4.78 (m, 1H, 2-*H*), 4.48 (dd,  $J$  = 11.7, 2.6 Hz, 1H, 4-*H*), 3.88 (brs, 1H, N-*H*), 3.82 (s, 3H, O-CH<sub>3</sub>), 3.71 (dq,  $J$  = 9.2, 7.0 Hz, 1H, CH<sub>2</sub> of ethyl), 3.58 (dq,  $J$  = 9.1, 7.0 Hz, 1H, CH<sub>2</sub> of ethyl), 2.38 (ddd,  $J$  = 12.3, 5.7, 2.7 Hz, 1H, 3-*H*), 2.12 – 1.98 (m, 1H, 3-*H*), 1.27 (t,  $J$  = 7.0 Hz, 3H, CH<sub>3</sub> of ethyl); <sup>13</sup>C NMR (75 MHz, CDCl<sub>3</sub>):  $\delta$  159.3, 144.8, 135.9, 128.3, 127.9, 127.3, 122.7, 117.9, 114.2, 114.1, 74.2, 63.6, 55.5 (x2), 37.3, 15.8; Anal. Calcd. for C<sub>18</sub>H<sub>21</sub>NO<sub>2</sub>: % C 76.29; H 7.47; N 4.94; O 11.29, found: C 76.33; H 7.52; N 4.94; O 11.42.

#### Synthesis of 2-(4-chlorophenyl)-4-ethoxy-1,2,3,4-tetrahydroquinoline 1o.

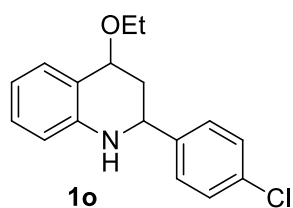

A 2 mL screw-capped vial was equipped with a magnetic stirring bar and charged with GO (5 mg) and CH<sub>3</sub>CN (300  $\mu$ L). The resulting suspension was sonicated for 2 min, using an ultrasonic bath, then 4-chlorobenzaldehyde (35 mg, 0.25 mmol), aniline (30 mg, 30  $\mu$ L, 0.33 mmol) and ethyl vinyl ether (27 mg, 36  $\mu$ L, 0.38 mmol) were added to the mixture. The sealed reaction vial was stirred at rt for 24 h. After this time, the reaction mixture was filtered through a celite cake, washing with DCM/EtOAc 1:1 (15 mL). The filtrate was evaporated to dryness in vacuo and the residue was purified by flash column chromatography (SiO<sub>2</sub>), eluting with PE/EtOAc (95:5) to afford **1o** as a mixture of diastereoisomers (*endo/exo* 91:9) as white foam (31 mg, 45%). The physical and spectral data agreed with those reported;<sup>11</sup> *R*<sub>f</sub> = 0.33 (PE/EtOAc 95:5); I.R.:  $\bar{\nu}$  (cm<sup>-1</sup>) = 3364, 3334, 3055, 3031, 2973, 2868, 2843, 1607, 1585, 1488, 1406, 1331, 1310, 1263, 1208, 1173, 1120, 1086, 1029, 1012, 865, 844, 813, 775, 748, 725, 696, 630, 615; <sup>1</sup>H NMR (300 MHz, CDCl<sub>3</sub>) selected data for **endo 1o**:  $\delta$  7.43 – 7.29 (m, 5H, 9-*H*, 4*H*-Ar), 7.06 (t, *J* = 7.5 Hz, 1H, 7-*H*), 6.75 (td, *J* = 7.5, 1.2 Hz, 1H, 8-*H*), 6.53 (dd, *J* = 8.0, 1.1 Hz, 1H, 6-*H*), 4.79 (dd, *J* = 10.2, 5.7 Hz, 1H, 2-*H*), 4.52 (dd, *J* = 11.3, 2.8 Hz, 1H, 4-*H*), 3.91 (brs, 1H, N-*H*), 3.74 – 3.49 (m, 2H, CH<sub>2</sub> of ethyl), 2.37 (ddd, *J* = 12.4, 5.7, 3.0 Hz, 1H, *H*-3), 2.04 (ddd, *J* = 12.4, 11.3, 10.3 Hz, 1H, *H*-3), 1.24 (t, *J* = 7.0 Hz, 3H, CH<sub>3</sub> of ethyl). <sup>13</sup>C NMR (75 MHz, CDCl<sub>3</sub>) selected data for **endo 1o**:  $\delta$  144.5, 142.4, 133.5, 128.9, 128.5, 128.1, 127.6, 122.7, 118.2, 114.3, 73.9, 63.7, 55.4, 37.2, 15.8.

#### Synthesis of 8-bromo-4-phenyl-2,3,3a,4,5,9b-hexahydrofuro[3,2-*c*]quinoline **1p**

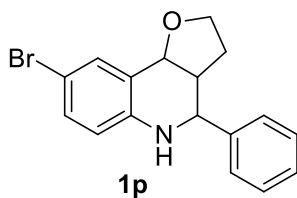

A 2 mL screw-capped vial was equipped with a magnetic stirring bar and charged with GO (5 mg) and CH<sub>3</sub>CN (300  $\mu$ L). The resulting suspension was sonicated for 2 min, using an ultrasonic bath, then benzaldehyde (26 mg, 25  $\mu$ L, 0.25 mmol), 4-bromoaniline (56 mg, 0.33 mmol) and 2,3-dihydrofuran (26 mg, 28  $\mu$ L, 0.38 mmol) were added to the mixture. The sealed reaction vial was stirred at rt for 4 h. After this time, the reaction mixture was filtered through a celite cake,

washing with DCM/EtOAc 1:1 (15 mL). The filtrate was evaporated to dryness in vacuo and the residue was purified by flash column chromatography (SiO<sub>2</sub>), eluting with PE/acetone (95:5 to 85:15) to afford **1p** as a mixture of diastereoisomers (*endo/exo* 74:26) as cream color foam (30 mg, 36%). The physical and spectral data agreed with those reported;<sup>12</sup> *R*<sub>f</sub> = 0.47 (PE/acetone 80:20); I.R.:  $\bar{\nu}$  (cm<sup>-1</sup>) = 3370, 3293, 3051, 3030, 2980, 2925, 2893, 2877, 1596, 1483, 1449, 1367, 1353, 1332, 1296, 1259, 1174, 1057, 1026, 994, 973, 915, 878, 806, 775, 759, 726, 700, 671; <sup>1</sup>H NMR (400 MHz, CDCl<sub>3</sub>) selected data for **endo 1p**:  $\delta$  7.47 – 7.29 (m, 6H, 5*H*-Ph and 9-*H*), 7.16 (dd, *J* = 8.5, 2.3 Hz, 1H, 7-*H*), 6.48 (d, *J* = 8.5 Hz, 1H, 6-*H*), 5.21 (d, *J* = 7.8 Hz, 1H, 9*b*-*H*), 4.68 (d, *J* = 3.0 Hz, 1H, 4-*H*), 3.91 – 3.79 (m, 2H, N-*H* and 2-*H*), 3.79 – 3.69 (m, 1H, 2-*H*), 2.81 – 2.72 (m, 1H, 3*a*-*H*), 2.23 – 2.10 (m, 1H, 3-*H*), 1.53 (dddd, *J* = 11.8, 8.1, 7.0, 3.4 Hz, 1H, 3-*H*). <sup>13</sup>C NMR (101 MHz, CDCl<sub>3</sub>) selected data for **endo 1p**:  $\delta$  144.2, 142.2, 133.1, 131.6, 129.2, 128.3, 126.9, 125.1, 117.0, 111.2, 75.9, 67.4, 57.6, 45.8, 24.9.

#### Synthesis of 5-(4-chlorophenyl)-3,4,4*a*,5,6,10*b*-hexahydro-2*H*-pyrano[3,2-*c*]quinoline **1q**

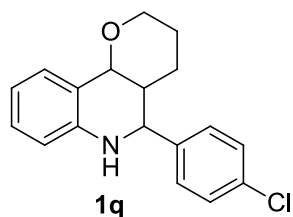

A 2 mL screw-capped vial was equipped with a magnetic stirring bar and charged with GO (5 mg) and CH<sub>3</sub>CN (300  $\mu$ L). The resulting suspension was sonicated for 2 min, using an ultrasonic bath, then 4-chlorobenzaldehyde (25 mg, 0.25 mmol), aniline (30 mg, 30  $\mu$ L, 0.33 mmol) and 3,4-dihydropyran (32 mg, 34  $\mu$ L, 0.38 mmol) were added to the mixture. The sealed reaction vial was stirred at rt for 48 h. After completion of the reaction, the reaction mixture was filtered through a celite cake, washing with DCM/EtOAc 1:1 (15 mL). The filtrate was evaporated to dryness in vacuo and the residue was purified by flash column chromatography (SiO<sub>2</sub>), eluting PE/Et<sub>2</sub>O/DCM (90:5:5 to 80:10:10) to afford **endo 1q** (14 mg, 19%) as cream color solid and **exo 1q** (7 mg, 9%) as white solid. The ratio *endo/exo* was determined by <sup>1</sup>H NMR of the crude and resulted 65:35. The physical and spectral data agreed with those reported;<sup>13</sup> **endo 1q**: mp 153- 155°C (DCM); *R*<sub>f</sub> = 0.35 (PE/Et<sub>2</sub>O/DCM 80:10:10); I.R.:  $\bar{\nu}$  (cm<sup>-1</sup>) = 3387, 3049, 3022, 2985, 2940, 2894, 2850, 1602, 1582, 1483, 1460, 1435, 1407, 1375, 1342, 1317, 1275, 1256, 1205, 1185, 1142, 1121, 1084, 1069, 1041, 1014, 969, 943, 926, 861, 843, 814, 747, 705, 664; <sup>1</sup>H NMR (400 MHz, CDCl<sub>3</sub>)  $\delta$  7.47 – 7.40 (m, 1H, 10-*H*), 7.40 – 7.31 (m, 4H, Ar), 7.10 (t, *J* = 7.5 Hz, 1H, 8-*H*), 6.81 (td, *J* = 7.5, 1.2 Hz, 1H, 9-*H*), 6.61 (dd, *J* = 8.0, 1.2 Hz, 1H, 7-*H*), 5.32 (d, *J* = 5.7 Hz, 1H, 10*b*-*H*), 4.67 (d, *J* = 2.6 Hz, 1H, 5-*H*), 3.82 (brs,

1H, N-H), 3.65 – 3.54 (m, 1H, 2-H), 3.48 – 3.37 (m, 1H, 2-H), 2.21– 2.05 (m, 1H, 4a-H), 1.63 – 1.39 (m, 3H, 2H-3 and H-4, overlapped with H<sub>2</sub>O signal), 1.37 – 1.22 (m, 1H, H-4); <sup>13</sup>C NMR (101 MHz, CDCl<sub>3</sub>) δ 145.0, 139.8, 133.3, 128.7, 128.3 (x2), 127.8, 120.1, 118.7, 114.7, 72.8, 60.8, 58.9, 39.0, 25.5, 18.1; Anal. Calcd. for C<sub>18</sub>H<sub>18</sub>ClNO: % C 72.11; H 6.05; N 4.67; O 5.34, found: C 72.15; H 6.05; N 4.75; O 5.45; **exo 1q**: mp 125-127 °C (DCM); *R*<sub>f</sub> = 0.28 (PE/Et<sub>2</sub>O/DCM 80:10:10); I.R.:  $\bar{\nu}$  (cm<sup>-1</sup>) = 3365, 3020, 2954, 2937, 2916, 2855, 2827, 1609, 1591, 1484, 1447, 1441, 1410, 1364, 1341, 1321, 1299, 1263, 1255, 1212, 1204, 1185, 1157, 1121, 1107, 1078, 1050, 1031, 1014, 1003, 973, 962, 936, 914, 884, 839, 817, 791, 748, 727, 713, 662, 640, 625; <sup>1</sup>H NMR (400 MHz, CDCl<sub>3</sub>) δ 7.40 – 7.31 (m, 4H, Ar), 7.23 (dd, *J* = 7.6, 1.6 Hz, 1H, 10-H), 7.10 (t, *J* = 8.0 Hz, 1H, 8-H), 6.72 (td, *J* = 7.4, 1.1 Hz, 1H, 9-H), 6.54 (dd, *J* = 8.0, 1.1 Hz, 1H, 7-H), 4.71 (d, *J* = 10.80 Hz, 1H, 5-H), 4.39 (d, *J* = 2.7 Hz, 1H, 10b-H), 4.15 – 4.06 (m, 1H, 2-H), 4.04 (brs, 1H, N-H), 3.73 (td, *J* = 11.5, 2.6 Hz, 1H, 2-H), 2.05 (ddt, *J* = 10.6, 5.2, 2.8 Hz, 1H, 4a-H), 1.91 – 1.74 (m, 1H, 3-H), 1.66 (tt, *J* = 13.4, 4.6 Hz, 1H, 4-H), 1.49 – 1.42 (m, 1H, 4-H), 1.40 – 1.31 (m, 1H, 3-H); <sup>13</sup>C NMR (101 MHz, CDCl<sub>3</sub>) δ 144.7, 141.0, 133.7, 131.1, 129.6, 129.3, 129.0, 120.8, 117.9, 114.4, 74.5, 68.8, 54.4, 39.1, 24.2, 22.1; Anal. Calcd. for C<sub>18</sub>H<sub>18</sub>ClNO: % C 72.11; H 6.05; N 4.67; O 5.34, found: C 72.17; H 6.06; N 4.74; O 5.40.

#### Synthesis of 5-(4-methoxyphenyl)-3,4,4a,5,6,10b-hexahydro-2H-pyrano[3,2-c]quinoline **1r**

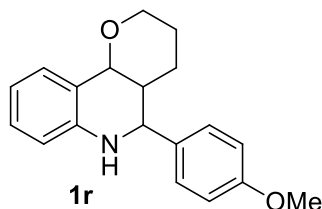

A 2 mL screw-capped vial was equipped with a magnetic stirring bar and charged with GO (5 mg) and CH<sub>3</sub>CN/H<sub>2</sub>O (4:1, 300 μL). The resulting suspension was sonicated for 2 min, using an ultrasonic bath, then 4-methoxybenzaldehyde (34 mg, 0.25 mmol), aniline (30 mg, 30 μL, 0.33 mmol) and 3,4-dihydropyran (32 mg, 34 μL, 0.38 mmol) were added to the mixture. The sealed reaction vial was stirred at 60 °C for 48 h. After completion of the reaction, the reaction mixture was filtered through a celite cake, washing with DCM/EtOAc 1:1 (15 mL). The filtrate was evaporated to dryness in vacuo and the residue was purified by flash column chromatography (SiO<sub>2</sub>), eluting with PE/DCM/Et<sub>2</sub>O (80:10:10) to afford a mixture of aldehyde/imine/**endo 1r** (65:10:25, 13 mg, 5%) and then **exo 1r** (26 mg, 35%) as pale yellow solid (26 mg, 35%). The ratio *endo/exo* was determined by <sup>1</sup>H NMR of the crude and resulted 25:75. The physical and spectral data agreed with those reported;<sup>14</sup> **exo 1r**: m.p. = 121 - 123°C (DCM); *R*<sub>f</sub> = 0.18 (PE/DCM/Et<sub>2</sub>O 80:10:10); I.R.:  $\bar{\nu}$  (cm<sup>-1</sup>) = 3385, 2931, 2838, 1607, 1588, 1510, 1487, 1463, 1441, 1366, 1351, 1303,

1287, 1257, 1239, 1222, 1182, 1111, 1081, 1057, 1025, 1004, 915, 888, 852, 838, 814, 797, 765, 748, 733, 693, 651;  $^1\text{H}$  NMR (300 MHz,  $\text{CDCl}_3$ )  $\delta$  7.38 – 7.30 (m, 2H, 2H-Ar), 7.22 (dd,  $J$  = 7.6, 1.6 Hz, 1H, 10-H), 7.09 (t,  $J$  = 7.5 Hz, 1H, 8-H), 6.95 – 6.88 (m, 2H, 2H-Ar), 6.70 (td,  $J$  = 7.4, 1.1 Hz, 1H, 9-H), 6.52 (dd,  $J$  = 8.1, 1.1 Hz, 1H, 7-H), 4.68 (d,  $J$  = 10.9 Hz, 1H, 5-H), 4.39 (d,  $J$  = 2.8 Hz, 1H, 10b-H), 4.15 – 4.06 (m, 1H, 2-H), 4.03 (brs, 1H, N-H), 3.83 (s, 3H,  $\text{CH}_3$ ), 3.73 (td,  $J$  = 11.5, 2.5 Hz, 1H, 2-H), 2.06 (ddt,  $J$  = 10.8, 5.2, 2.8 Hz, 1H, 4a-H), 1.93 – 1.75 (m, 1H, 3-H), 1.65 (tt,  $J$  = 13.2, 4.6 Hz, 1H, 4-H), 1.59 – 1.44 (m, 1H, 4-H), 1.38 – 1.28 (m, 1H, 3-H);  $^{13}\text{C}$  NMR (75 MHz,  $\text{CDCl}_3$ )  $\delta$  159.4, 145.0, 134.4, 131.1, 129.5, 129.0, 120.8, 117.5, 114.2, 114.1, 74.8, 68.9, 55.5, 54.2, 39.1, 24.3, 22.1; Anal. Calcd. for  $\text{C}_{19}\text{H}_{21}\text{NO}_2$ : % C 77.26; H 7.17; N 4.74; O 10.83, found: C 77.32; H 7.18; N 4.75; O 10.87.

#### Synthesis of 4-(4-chlorophenyl)-3a,4,5,9b-tetrahydro-3H-cyclopenta[c]quinoline **1s**.

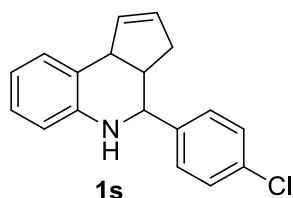

A 2 mL screw-capped vial was equipped with a magnetic stirring bar and charged with GO (5 mg) and  $\text{CH}_3\text{CN}$  (300  $\mu\text{L}$ ). The resulting suspension was sonicated for 2 min, using an ultrasonic bath, then 4-chlorobenzaldehyde (34 mg, 0.25 mmol), aniline (30 mg, 30  $\mu\text{L}$ , 0.33 mmol) and freshly distilled cyclopentadiene (66 mg, 84  $\mu\text{L}$ , 1.00 mmol) were added to the mixture. The sealed reaction vial was stirred at 60  $^\circ\text{C}$  for 24 h. After completion of the reaction, the reaction mixture was filtered through a celite cake, washing with DCM/EtOAc 1:1 (15 mL). The filtrate was evaporated to dryness in vacuo and the residue was purified by flash column chromatography ( $\text{SiO}_2$ ), eluting with PE/acetone (95:5) to afford **1s** as a mixture of diastereoisomers (*endo/exo* 90:10) as white foam (49 mg, 70%). Crystallization from  $\text{Et}_2\text{O}$ /pentane gave the pure *endo* **1s** as white crystals. The physical and spectral data agreed with those reported;<sup>2</sup> *endo* **1s**: m.p. = 137–139 $^\circ\text{C}$  ( $\text{Et}_2\text{O}$ /pentano);  $R_f$  = 0.63 (PE/acetone 90:10); I.R.:  $\bar{\nu}$  ( $\text{cm}^{-1}$ ) = 3360, 3046, 2961, 2929, 2871, 2849, 1604, 1591, 1489, 1469, 1435, 1419, 1408, 1354, 1318, 1289, 1264, 1226, 1203, 1177, 1160, 1129, 1113, 1086, 1033, 1014, 1001, 968, 956, 939, 890, 866, 843, 810, 794, 752, 725, 697, 680, 632, 621;  $^1\text{H}$  NMR (400 MHz,  $\text{CDCl}_3$ )  $\delta$  7.42 – 7.31 (m, 4H, 4H-Ar), 7.07 (d,  $J$  = 7.6 Hz, 1H, 9-H), 7.00 (t,  $J$  = 7.6 Hz, 1H, 7-H), 6.77 (td,  $J$  = 7.4, 1.3 Hz, 1H, 8-H), 6.64 (dd,  $J$  = 8.0, 1.3 Hz, 1H, 6-H), 5.89 – 5.82 (m, 1H, 1-H), 5.71 – 5.60 (m, 1H, 2-H), 4.62 (d,  $J$  = 3.3 Hz, 1H, 4-H), 4.12 (d,  $J$  = 9.2 Hz, 1H, 9b-H), 3.70 (brs, 1H, N-H), 2.97 (dddd,  $J$  = 8.9, 3.3 Hz, 1H, 3a-H), 2.60 (dddd,  $J$  = 16.5, 9.4, 2.4 Hz, 1H, 3-H), 1.80 (dddd,  $J$  = 16.3, 8.7, 2.7, 1.5 Hz, 1H, 3-H);  $^{13}\text{C}$  NMR (101 MHz,  $\text{CDCl}_3$ )  $\delta$  145.4, 141.5, 134.1,

133.0, 130.4, 129.2, 128.8, 128.0, 126.5, 126.1, 119.5, 116.1, 57.6, 46.4, 46.0, 31.5; Anal. Calcd. for  $C_{18}H_{16}ClN$ : % C 76.72; H 5.72; N 4.97, found: C 76.62; H 5.63; N 5.03.

## Synthesis of quinolines **2** via oxidation of Povarov products

### Synthesis of 2-(2-(4-chlorophenyl)quinolin-3-yl)ethan-1-ol **2a**.

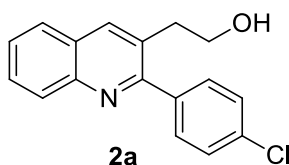

A 10 mL screw-capped vial was equipped with a magnetic stirring bar and charged with GO (16 mg) and  $CH_3CN/H_2O$  (4:1, 1.6 mL). The resulting suspension was sonicated for 2 min, using an ultrasonic bath. **1a** (45 mg, 0.16 mmol, *endo/exo* = 80:20) was added and the mixture was stirred at 120 °C for 24 h. After completion of the reaction, as indicated by thin-layer chromatography (TLC), the reaction mixture was filtered through a celite cake, washing with DCM/EtOAc 1:1 (15 mL) and MeOH (5 mL). The filtrate was evaporated to dryness and the residue was purified by flash column chromatography ( $SiO_2$ ), eluting with PE/acetone (90:10 to 60:40) to afford unreacted *exo* **1a** (6 mg, 13%) and then **2a** (33 mg, 73%). as white solid.

Quinoline **2a** has been obtained in 92 % isolated yield, following the same procedure starting from pure *endo* **1a**.

Quinoline **2a** has been obtained in 88 % isolated yield, starting from pure *endo* **1a** and using microwaves irradiation as described below: a suspension of GO (10 mg) and *endo* **1a** (30 mg, 0.10 mmol) in  $CH_3CN/H_2O$  (2:1, 1.0 mL) was sonicated for 2 min using an ultrasonic bath and then heated at 120 °C under MW irradiation for 3 h. The reaction mixture was filtered through a celite cake, washing with DCM/EtOAc 1:1 (15 mL). The filtrate was evaporated to dryness and the residue was purified by flash column chromatography ( $SiO_2$ ), eluting with PE/acetone (90:10 to 60:40) to afford unreacted *endo* **1a** (2 mg, 8%) and then **2a** (25 mg, 88%) as white solid.

**2a**: mp 116-119°C (PE/acetone);  $R_f$  = 0.37 (PE/acetone 75:25); I.R.:  $\bar{\nu}$  ( $cm^{-1}$ ) = 3351, 3176, 3055, 2934, 1622, 1598, 1559, 1485, 1423, 1395, 1338, 1264, 1161, 1121, 1089, 1042, 1005, 958, 907, 841, 793, 751, 618;  $^1H$  NMR (300 MHz,  $CDCl_3$ )  $\delta$  8.10 (s, 1H, 4-*H*), 8.07 (d,  $J$  = 7.9 Hz, 1H, 8-*H*), 7.78 (d,  $J$  = 8.2, 1H, 5-*H*), 7.71 – 7.62 (m, 1H, 7-*H*), 7.53 (tt,  $J$  = 8.3, 1.5 Hz, 1H, 6-*H*), 7.48 – 7.37 (m, 4H, Ar), 3.69 (td,  $J$  = 6.6, 1.9 Hz, 2H,  $CH_2$ -O), 2.97 (td,  $J$  = 6.7, 2.0 Hz, 2H,  $CH_2$ -C), 2.19 (brs, 1H, OH);  $^{13}C$

NMR (75 MHz, CDCl<sub>3</sub>)  $\delta$  159.4, 146.6, 139.0, 137.3, 134.5, 130.4, 129.9, 129.5, 129.1, 128.7, 127.6, 127.2, 126.9, 62.4, 35.8; Anal. Calcd. for C<sub>17</sub>H<sub>14</sub>ClNO: % C 71.96; H 4.97; N 4.94; O 5.64, found: C 72.03; H 5.05; N 5.03; O 5.74.

**2-(2-(4-methoxyphenyl)quinolin-3-yl)ethan-1-ol 2h**

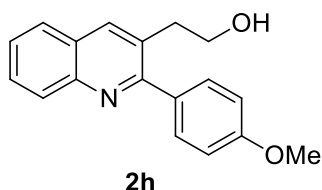

A 10 mL screw-capped vial was equipped with a magnetic stirring bar and charged with GO (10 mg) and CH<sub>3</sub>CN/H<sub>2</sub>O (4:1, 1.0 mL). The resulting suspension was sonicated for 2 min, using an ultrasonic bath. **1h** (28 mg, 0.10 mmol, *endo/exo* = 80:20) was added and the mixture was stirred at 120 °C for 24 h. After completion of the reaction, as indicated by thin-layer chromatography (TLC), the reaction mixture was filtered through a celite cake, washing with DCM/EtOAc 1:1 (15 mL). The filtrate was evaporated to dryness and the residue was purified by flash column chromatography (SiO<sub>2</sub>), eluting with PE/acetone (90:10 to 60:40) to afford unreacted **exo 1h** (4 mg, 14%) and then **2h** (21 mg, 75%) as cream color solid: mp 127 -130 °C (PE/acetone); *R*<sub>f</sub> = 0.21 (PE/acetone 80:20); I.R.:  $\bar{\nu}$  (cm<sup>-1</sup>) = 3278, 3014, 2962, 2929, 2864, 2836, 1610, 1516, 1488, 1456, 1441, 1421, 1374, 1340, 1291, 1246, 1176, 1136, 1107, 1041, 1021, 970, 917, 869, 840, 815, 800, 763, 734, 636, 619; <sup>1</sup>H NMR (300 MHz, CDCl<sub>3</sub>)  $\delta$  8.13 – 8.07 (m, 2H, 4-*H* and 8-*H*), 7.79 (dd, *J* = 8.0, 1.4 Hz, 1H, 5-*H*), 7.67 (ddd, *J* = 8.6, 6.9, 1.5 Hz, 1H, 7-*H*), 7.55 – 7.46 (m, 3H, 6-*H* and 2*H*-Ar), 7.04 – 6.96 (m, 2H, 2*H*-Ar), 3.86 (s, 3H, CH<sub>3</sub>), 3.78 – 3.70 (m, 2H CH<sub>2</sub>-O), 3.07 (t, *J* = 6.7 Hz, 2H, CH<sub>2</sub>-C), 1.67 (brs, 1H, O-*H*, overlapped with H<sub>2</sub>O signal); <sup>13</sup>C NMR (75 MHz, CDCl<sub>3</sub>)  $\delta$  160.5, 159.8, 146.8, 137.0, 133.2, 130.3, 130.1, 129.3 (x2), 127.4, 127.1, 126.6, 114.0, 62.7, 55.5, 36.2; Anal. Calcd. for C<sub>18</sub>H<sub>17</sub>NO<sub>2</sub>: % C 77.40; H 6.13; N 5.01; O 11.46, found: C 77.38; H 6.12; N 5.03; O 11.54.

**2-(2-(2-(benzyloxy)phenyl)quinolin-3-yl)ethan-1-ol 2i**

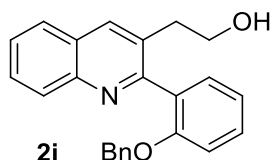

A 10 mL screw-capped vial was equipped with a magnetic stirring bar and charged with GO (10 mg) and CH<sub>3</sub>CN/H<sub>2</sub>O (4:1, 1.0 mL). The resulting suspension was sonicated for 2 min, using an ultrasonic bath. **1i** (36 mg, 0.10 mmol, *endo/exo* = 60:40) was added and the mixture was stirred at

120 °C for 24 h. After completion of the reaction, as indicated by thin-layer chromatography (TLC), the reaction mixture was filtered through a celite cake, washing with DCM/EtOAc 1:1 (15 mL) and MeOH (10 mL). The filtrate was evaporated to dryness and the residue was purified by flash column chromatography (SiO<sub>2</sub>), eluting with PE/acetone (90:10 to 60:40) to afford unreacted **exo 1i** (4 mg, 6%) and then **2i** (28 mg, 79%) as colorless oil: *R*<sub>f</sub> = 0.21 (PE/acetone 80:20); I.R.:  $\bar{\nu}$  (cm<sup>-1</sup>) = 3274, 3061, 3033, 2929, 2868, 1700, 1602, 1583, 1489, 1447, 1418, 1378, 1341, 1312, 1291, 1262, 1222, 1161, 1129, 1111, 1048, 1019, 908, 854, 793, 749, 727, 695, 644, 618; <sup>1</sup>H NMR (300 MHz, CDCl<sub>3</sub>)  $\delta$  8.14 (d, *J* = 8.4 Hz, 1H, 8-*H*), 8.08 (s, 1H, 4-*H*), 7.83 (dd, *J* = 8.0, 1.5 Hz, 1H, 5-*H*), 7.68 (ddd, *J* = 8.4, 6.8, 1.5 Hz, 1H, 7-*H*), 7.54 (ddd, *J* = 8.2, 6.9, 1.2 Hz, 1H, 6-*H*), 7.44 – 7.34 (m, 2H, Ar), 7.24 – 7.12 (m, 5H, Ph), 7.12 – 7.03 (m, 2H, Ar), 5.04 (d, *J* = 3.4 Hz, 2H, CH<sub>2</sub>-benzyl), 3.71 (t, *J* = 6.1 Hz, 2H, CH<sub>2</sub>-O), 2.94 (t, *J* = 6.6 Hz, 2H, CH<sub>2</sub>-C), 1.44 (t, *J* = 6.0 Hz, 1H, O-*H*); <sup>13</sup>C NMR (75 MHz, CDCl<sub>3</sub>)  $\delta$  159.1, 155.9, 146.9, 137.0, 135.9, 131.5, 130.8, 130.7, 130.0, 129.4, 129.1, 128.5, 127.8, 127.7, 127.2, 126.9, 126.6, 121.8, 113.3, 70.6, 62.6, 36.0; Anal. Calcd. for C<sub>24</sub>H<sub>21</sub>NO<sub>2</sub>: % C 81.10; H 5.96; N 3.94; O 9.00, found: C 81.23; H 6.03; N 3.96; O 9.12.

#### 2-(2-cyclopropylquinolin-3-yl)ethan-1-ol **2j**

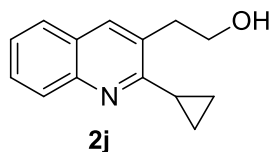

A 10 mL screw-capped vial was equipped with a magnetic stirring bar and charged with GO (10 mg) and CH<sub>3</sub>CN/H<sub>2</sub>O (4:1, 1.0 mL). The resulting suspension was sonicated for 2 min, using an ultrasonic bath. **1j** (22 mg, 0.10 mmol, *endo/exo* = 85:15) was added and the mixture was stirred at 120 °C for 24 h. After completion of the reaction, as indicated by thin-layer chromatography (TLC), the reaction mixture was filtered through a celite cake, washing with DCM/EtOAc 1:1 (15 mL). The filtrate was evaporated to dryness and the residue was purified by flash column chromatography (SiO<sub>2</sub>), eluting with PE/acetone (90:10 to 60:40) to afford unreacted **1j** (*endo/exo* 1:1, 3 mg, 14%) and then **2j** (13 mg, 61%) as colorless oil: *R*<sub>f</sub> = 0.24 (PE/acetone 75:25); I.R.:  $\bar{\nu}$  (cm<sup>-1</sup>) = 3426, 3057, 3007, 2937, 2873, 1619, 1601, 1562, 1492, 1425, 1345, 1224, 1143, 1063, 1047, 1022, 911, 852, 788, 753, 618; <sup>1</sup>H NMR (300 MHz, CDCl<sub>3</sub>)  $\delta$  7.91 (d, *J* = 8.4 Hz, 1H, 8-*H*), 7.87 (s, 1H, 4-*H*), 7.70 (dd, *J* = 8.0, 1.5 Hz, 1H, 5-*H*), 7.59 (ddd, *J* = 8.5, 7.0, 1.5 Hz, 1H, 7-*H*), 7.41 (ddd, *J* = 8.1, 6.9, 1.3 Hz, 1H, 6-*H*), 4.03 (t, *J* = 6.7 Hz, 2H, CH<sub>2</sub>-O), 3.23 (t, *J* = 6.7 Hz, 2H, CH<sub>2</sub>-C), 2.30 (tt, *J* = 8.0, 4.8 Hz, 1H, CH-cyclopropyl), 1.64- 1.48 (m, 1H, O-*H*, overlapped with H<sub>2</sub>O signal), 1.32 – 1.25 (m, 2H, CH<sub>2</sub>-cyclopropyl), 1.09 – 0.99 (m, 2H, CH<sub>2</sub>-cyclopropyl); <sup>13</sup>C NMR (75 MHz, CDCl<sub>3</sub>)  $\delta$  161.8, 147.0, 135.7,



130.3, 128.8, 128.7, 127.0, 126.8, 125.5, 62.6, 36.1, 14.5, 9.8; Anal. Calcd. for C<sub>14</sub>H<sub>15</sub>NO: % C 78.84; H 7.09; N 6.57; O 7.50, found: C 78.96; H 7.12; N 6.54; O 7.56.

**2-(2-isopropylquinolin-3-yl)ethan-1-ol 2k**

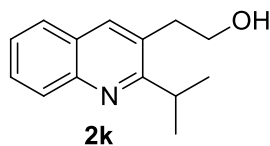

A 10 mL screw-capped vial was equipped with a magnetic stirring bar and charged with GO (14 mg) and CH<sub>3</sub>CN/H<sub>2</sub>O (4:1, 1.4 mL). The resulting suspension was sonicated for 2 min, using an ultrasonic bath. **1k** (30 mg, 0.14 mmol, *endo/exo* = 90:10) was added and the mixture was stirred at 120 °C for 24 h. After completion of the reaction, as indicated by thin-layer chromatography (TLC), the reaction mixture was filtered through a celite cake, washing with DCM/EtOAc 1:1 (15 mL) and MeOH. The filtrate was evaporated to dryness and the residue was purified by flash column chromatography (SiO<sub>2</sub>), eluting with PE/acetone (90:10 to 70:30) to afford unreacted **1k** (*endo/exo* 1:1, 6 mg, 20%) and then **2k** (21 mg, 70%) as colorless oil: *R*<sub>f</sub> = 0.33 (PE/acetone 75:25); I.R.:  $\bar{\nu}$  (cm<sup>-1</sup>) = 3322, 3061, 2961, 2930, 2871, 1621, 1600, 1563, 1491, 1455, 1422, 1378, 1359, 1219, 1137, 1043, 955, 908, 854, 796, 753, 729, 646, 618; <sup>1</sup>H NMR (300 MHz, CDCl<sub>3</sub>)  $\delta$  8.03 (d, 1H, 8-*H*), 7.90 (s, 1H, 4-*H*), 7.72 (dd, *J* = 8.1, 1.2 Hz, 1H, 5-*H*), 7.62 (ddd, *J* = 8.4, 6.9, 1.5 Hz, 1H, 7-*H*), 7.44 (ddd, *J* = 8.1, 6.9, 1.2 Hz, 1H, 6-*H*), 3.99 – 3.88 (m, 2H, CH<sub>2</sub>-O), 3.45 (hept, *J* = 6.7 Hz, 1H, CH-isopropyl), 3.11 (td, *J* = 6.8, 0.7 Hz, 2H, CH<sub>2</sub>-C), 1.68 – 1.56 (m, 1H, O-*H*, overlapped with H<sub>2</sub>O signal), 1.39 (d, *J* = 6.7 Hz, 6H, 2CH<sub>3</sub>); <sup>13</sup>C NMR (75 MHz, CDCl<sub>3</sub>)  $\delta$  166.4, 147.2, 136.3, 129.2, 129.0, 128.7, 127.0, 127.0, 125.8, 63.1, 35.6, 31.7, 22.5; Anal. Calcd. for C<sub>14</sub>H<sub>17</sub>NO: % C 78.10; H 7.96; N 6.51; O 7.43, found: C 78.14; H 7.98; N 6.54; O 7.56.

**(E)-2-(2-styrylquinolin-3-yl)ethan-1-ol 2l**

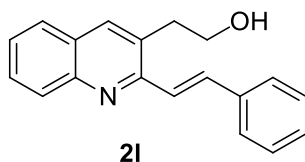

A 10 mL screw-capped vial was equipped with a magnetic stirring bar and charged with GO (10 mg) and CH<sub>3</sub>CN/H<sub>2</sub>O (4:1, 1.0 mL). The resulting suspension was sonicated for 2 min, using an ultrasonic bath. **1l** (28 mg, 0.14 mmol, *endo/exo* = 80:20) was added and the mixture was stirred at 120 °C for 24 h. After completion of the reaction, as indicated by thin-layer chromatography (TLC), the reaction mixture was filtered through a celite cake, washing with DCM/EtOAc 1:1 (15 mL). The filtrate was evaporated to dryness and the residue was purified by flash column chromatography

(SiO<sub>2</sub>), eluting with PE/acetone (90:10 to 60:40) to afford unreacted **exo 1l** (2 mg, 9%) and then **2l** (16 mg, 58%) as cream solid: mp 113-114 °C (PE/acetone); *R*<sub>f</sub> = 0.26 (PE/acetone 75:25); I.R.:  $\bar{\nu}$  (cm<sup>-1</sup>) = 3152, 3042, 2953, 2924, 2873, 1643, 1616, 1601, 1576, 1559, 1494, 1451, 1418, 1376, 1340, 1313, 1243, 1222, 1174, 1144, 1100, 1068, 1029, 988, 912, 875, 847, 820, 786, 751, 716, 689, 676, 626, 603; <sup>1</sup>H NMR (300 MHz, CDCl<sub>3</sub>)  $\delta$  8.05 (d, *J* = 8.8 Hz, 1H, 8-*H*), 7.98 (d, *J* = 15.6 Hz, 1H, *CH*-styryl), 7.90 (s, 1H, 4-*H*), 7.70 – 7.60 (m, 4H, 5-*H*, 7-*H* and 2*H*-Ph), 7.51 (d, *J* = 15.5 Hz, 1H, *CH*-styryl), 7.46 – 7.31 (m, 4H, 6-*H* and 3*H*-Ph), 4.01 (t, *J* = 6.5 Hz, 2H, CH<sub>2</sub>-O), 3.18 (t, *J* = 6.5 Hz, 2H, CH<sub>2</sub>-C), 2.21 – 2.09 (m, 1H, O-*H*); <sup>13</sup>C NMR (75 MHz, CDCl<sub>3</sub>)  $\delta$  154.7, 147.1, 137.2, 137.0, 136.2, 130.0, 129.3, 129.0, 128.9, 128.7, 127.6, 127.6, 127.1, 126.3, 124.1, 62.7, 36.1; Anal. Calcd. for C<sub>19</sub>H<sub>17</sub>NO: % C 82.88; H 6.22; N 5.09; O 5.81, found: C 83.01; H 6.28; N 5.02; O 5.89.

### 2-(4-chlorophenyl)quinoline 2o

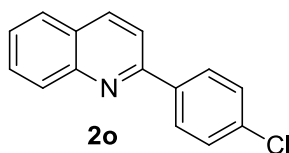

A 10 mL screw-capped vial was equipped with a magnetic stirring bar and charged with GO (9 mg) and CH<sub>3</sub>CN/H<sub>2</sub>O (4:1, 0.9 mL). The resulting suspension was sonicated for 2 min, using an ultrasonic bath. **1o** (25 mg, 0.09 mmol, *endo/exo* = 90:10) was added and the mixture was stirred at 120 °C for 24 h. After completion of the reaction, as indicated by thin-layer chromatography (TLC), the reaction mixture was filtered through a celite cake, washing with DCM/EtOAc 1:1 (15 mL) and MeOH. The filtrate was evaporated to dryness and the residue was purified by flash column chromatography (SiO<sub>2</sub>), eluting with PE/acetone (90:10 to 70:30) to afford unreacted **2o** (4 mg, 19%) as white solid. The physical and spectral data agreed with those reported;<sup>15</sup> mp 112-114 °C (PE/acetone); *R*<sub>f</sub> = 0.52 (PE/EtOAc 90:10); I.R.:  $\bar{\nu}$  (cm<sup>-1</sup>) = 3057, 2919, 2850, 1617, 1588, 1578, 1553, 1509, 1486, 1431, 1399, 1378, 1318, 1286, 1263, 1244, 1211, 1158, 1128, 1106, 1089, 1050, 1007, 940, 815, 787, 771, 751, 733, 715, 672, 635, 621; <sup>1</sup>H NMR (300 MHz, CDCl<sub>3</sub>)  $\delta$  8.23 (d, *J* = 8.6 Hz, 1H, 4-*H*), 8.18 – 8.09 (m, 3H, 2*H*-Ar and 8-*H*), 7.87 – 7.81 (m, 2H, 5-*H* and 3-*H*), 7.74 (ddd, *J* = 8.5, 6.9, 1.5 Hz, 1H, 7-*H*), 7.58 – 7.45 (m, 3H, 2*H*-Ar and 6-*H*); <sup>13</sup>C NMR (75 MHz, CDCl<sub>3</sub>)  $\delta$  156.2, 148.4, 138.2, 137.1, 135.7, 130.0, 129.9, 129.2, 129.0, 127.6, 127.4, 126.7, 118.7; Anal. Calcd. for C<sub>15</sub>H<sub>10</sub>ClN: % C 75.16; H 4.21; N 5.84, found: C 75.19; H 4.28; N 5.80.

## One-pot synthesis of 2,3-disubstituted quinolines 2

### Synthesis of 2-(2-(4-chlorophenyl)quinolin-3-yl)ethan-1-ol 2a.

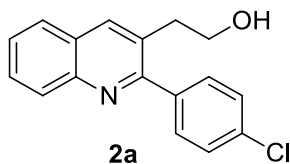

A screw-capped vial was equipped with a magnetic stirring bar and charged with GO (5 mg) and CH<sub>3</sub>CN (1.3 mL). The resulting suspension was sonicated for 2 min, using an ultrasonic bath, then 4-chlorobenzaldehyde (35 mg, 0.25 mmol), aniline (30 mg, 30  $\mu$ L, 0.323 mmol) and 2,3-dihydrofuran (44 mg, 47  $\mu$ L, 0.62 mmol) were added to the mixture. The sealed reaction vial was stirred at rt for 6 h. After completion of the reaction, GO (20 mg), CH<sub>3</sub>CN (0.7 mL) and H<sub>2</sub>O (0.5 mL) were added and the resulting suspension was stirred at 120 °C for 48 h. Then, the reaction mixture was filtered through a celite cake, washing with DCM/EtOAc 1:1 (15 mL) and MeOH (5 mL). The filtrate was evaporated to dryness and the residue was purified by flash column chromatography (SiO<sub>2</sub>), eluting with PE/acetone (90:10 to 60:40) to afford unreacted **1a** (17 mg, 24%, *endo/exo* 25:75) and then **2a** (30 mg, 42%) as white solid.

### 2-(2-(4-methoxyphenyl)quinolin-3-yl)ethan-1-ol 2h

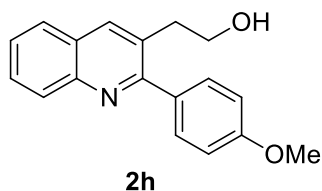

A screw-capped vial was equipped with a magnetic stirring bar and charged with GO (5 mg) and CH<sub>3</sub>CN (1.3 mL). The resulting suspension was sonicated for 2 min, using an ultrasonic bath, then 4-methoxybenzaldehyde (34 mg, 0.25 mmol), aniline (30 mg, 30  $\mu$ L, 0.32 mmol) and 2,3-dihydrofuran (44 mg, 47  $\mu$ L, 0.62 mmol) were added to the mixture. The sealed reaction vial was stirred at rt for 24 h. After completion of the reaction, GO (20 mg), CH<sub>3</sub>CN (0.7 mL) and H<sub>2</sub>O (0.5 mL) were added and the resulting suspension was stirred at 120 °C for 48 h. Then, the reaction mixture was filtered through a celite cake, washing with DCM/EtOAc 1:1 (15 mL) and MeOH (5 mL). The filtrate was evaporated to dryness and the residue was purified by flash column chromatography (SiO<sub>2</sub>), eluting with PE/acetone (90:10 to 60:40) to afford unreacted **1h** (11 mg, 16%, *endo/exo* 10:90) and then **2h** (28 mg, 40%) as cream color solid.

### 2-(2-(2-(benzyloxy)phenyl)quinolin-3-yl)ethan-1-ol 2i

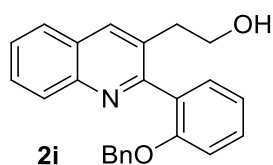

A screw-capped vial was equipped with a magnetic stirring bar and charged with GO (6 mg) and CH<sub>3</sub>CN (1.5 mL). The resulting suspension was sonicated for 2 min, using an ultrasonic bath, then 2-benzyloxybenzaldehyde (64 mg, 0.30 mmol), aniline (36 mg, 36  $\mu$ L, 0.39 mmol) and 2,3-dihydrofuran (53 mg, 57  $\mu$ L, 0.75 mmol) were added to the mixture. The sealed reaction vial was stirred at rt for 24 h. After completion of the reaction, GO (24 mg), CH<sub>3</sub>CN (0.9 mL) and H<sub>2</sub>O (0.6 mL) were added and the resulting suspension was stirred at 120 °C for 48 h. Then, the reaction mixture was filtered through a celite cake, washing with DCM/EtOAc 1:1 (15 mL) and MeOH (5 mL). The filtrate was evaporated to dryness and the residue was purified by flash column chromatography (SiO<sub>2</sub>), eluting with PE/acetone (90:10 to 60:40) to afford unreacted **1i** (26 mg, 29%, *endo/exo* 20:80) and then **2i** (37 mg, 42%) as colorless oil.

#### 2-(2-cyclopropylquinolin-3-yl)ethan-1-ol **2j**

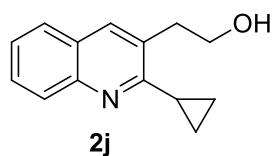

A screw-capped vial was equipped with a magnetic stirring bar and charged with GO (5 mg) and CH<sub>3</sub>CN (1.3 mL). The resulting suspension was sonicated for 2 min, using an ultrasonic bath, cyclopropanecarboxaldehyde (18 mg, 19  $\mu$ L, 0.25 mmol), aniline (30 mg, 30  $\mu$ L, 0.33 mmol) and 2,3-dihydrofuran (44 mg, 47  $\mu$ L, 0.62 mmol) were added to the mixture. The sealed reaction vial was stirred at rt for 24 h. After completion of the reaction, GO (20 mg), CH<sub>3</sub>CN (0.7 mL) and H<sub>2</sub>O (0.5 mL) were added and the resulting suspension was stirred at 120 °C for 48 h. Then, the reaction mixture was filtered through a celite cake, washing with DCM/EtOAc 1:1 (15 mL) and MeOH (5 mL). The filtrate was evaporated to dryness and the residue was purified by flash column chromatography (SiO<sub>2</sub>), eluting with PE/acetone (90:10 to 60:40) to afford unreacted **1j** (18 mg, 33%, *endo/exo* 80:20) and then **2j** (9 mg, 17%) as colorless oil.

## Synthesis of *endo* **3** and **4**

### Synthesis of 4-(4-chlorophenyl)-5-propyl-2,3,3a,4,5,9b-hexahydrofuro[3,2-c]quinoline *endo* **3**

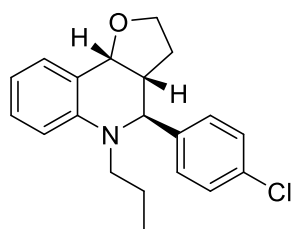

**endo 3a (rac)**

A solution of **endo 1a** (50 mg, 0.17 mmol) in dry DCM (2 mL) was treated with propionaldehyde (51 mg, 63  $\mu$ L, 0.87 mmol) and AcOH (42 mg, 40  $\mu$ L, 0.70 mmol) at rt under N<sub>2</sub>. After stirring 15 min, NaBH(OAc)<sub>3</sub> (111 mg, 0.53 mmol) was added portion wise and the suspension was stirred for 2 h at rt. Then, the reaction mixture was diluted with saturated NaHCO<sub>3</sub> solution (5 mL) and extracted with DCM (10-15 mL). The combined organic phases were washed with brine, dried with anhydrous Na<sub>2</sub>SO<sub>4</sub>, filtrated and the solvent was removed. The desired product was isolated by flash chromatography over silica gel (PE/acetone 95:5 to 90:10) to afford **endo 3** as colorless oil (25 mg, Y = 45%); *R*<sub>f</sub> = 0.59 (PE/acetone 85:15); <sup>1</sup>H NMR (300 MHz, CDCl<sub>3</sub>)  $\delta$  7.37 (dd, *J* = 7.5, 1.2 Hz, 1H, 7-*H*), 7.26 – 7.16 (m, 5H, 4*H*-Ar and 9-*H*), 6.81 – 6.70 (m, 2H, 6-*H* and 8-*H*), 4.91 (d, *J* = 6.0 Hz, 1H, 9b-*H*), 4.45 (d, *J* = 5.5 Hz, 1H, 4-*H*), 3.66 (td, *J* = 8.4, 6.5 Hz, 1H, *H*-2) 3.31 (ddd, *J* = 14.8, 8.8, 6.1 Hz, 1H, 1H of CH<sub>2</sub>-N), 3.19 (td, *J* = 8.5, 5.5 Hz, 1H, 1H of *H*-2), 2.84 (ddd, *J* = 14.8, 9.1, 6.9 Hz, 1H, 1H of CH<sub>2</sub>-N), 2.78 – 2.67 (m, 1H, 3a-*H*), 2.05 – 1.81 (m, 2H, CH<sub>2</sub>-3), 1.56 – 1.43 (m, 2H, CH<sub>2</sub>-CH<sub>3</sub>), 0.81 (t, *J* = 7.4 Hz, 3H, CH<sub>3</sub>); <sup>13</sup>C NMR (75 MHz, CDCl<sub>3</sub>)  $\delta$  144.7, 140.0, 133.0, 130.5, 129.8, 129.2, 128.4, 121.9, 117.2, 112.3, 75.4, 65.6, 62.2, 51.5, 42.5, 27.4, 19.4, 11.6; Anal. Calcd. for C<sub>20</sub>H<sub>22</sub>ClNO: % C 73.27; H 6.76; N 4.27; O 4.88, found: C 73.35; H 6.58; N 4.80; O 4.95.

#### Synthesis of 6,7-dihydrobenzo[2,3]oxepino[4,5-*b*]quinolone **4**

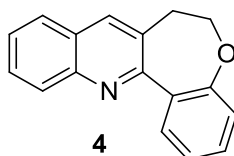

A solution of **2i** (50 mg, 0.14 mmol) in EtOH (96%, 2.5 mL) was treated with 10% Pd/C (15 mg, 30 wt. %) and hydrogenated at rt under the slight overpressure of an inflated balloon. After stirring overnight, the suspension was filtered through a celite cake, washing with a mixture of EtOH/DCM 1:1 and evaporated under reduced pressure. The crude filtrated on SiO<sub>2</sub> washing with EtOAc + 10%MeOH to afford debenzylated derivative (30 mg, 81%), which was taken up in dry THF (3 mL), cooled to 0 °C, and treated with triphenylphosphine (39 mg, 0.15 mmol) and *t*-butyl azodicarboxylate (35 mg, 0.15 mmol). The mixture was stirred for 30 min at rt. Then, the solvent was removed under reduced pressure and the resulting crude was purified by silica gel column

chromatography, eluting with PE/EtOAc (95:5 to 85:15) to afford **4** as white solid (22 mg, 89%); mp 138-139 °C (PE/EtOAc);  $R_f = 0.53$  (PE/EtOAc 80:20); I.R.:  $\bar{\nu}$  ( $\text{cm}^{-1}$ ) = 3049, 2967, 2938, 2876, 1620, 1603, 1577, 1558, 1488, 1451, 1428, 1417, 1348, 1314, 1296, 1233, 1207, 1196, 1141, 1130, 1104, 1066, 1049, 1030, 1011, 949, 937, 921, 866, 852, 818, 796, 784, 766, 752, 725, 707, 660, 634, 615;  $^1\text{H}$  NMR (300 MHz,  $\text{CDCl}_3$ )  $\delta$  8.19 (ddt,  $J = 8.4, 1.3, 0.7$  Hz, 1H, 16-*H*), 8.01 (s, 1H, 8-*H*), 7.97 (dd,  $J = 7.6, 1.9$  Hz, 1H, 12-*H*), 7.82 (dd,  $J = 8.0, 1.5$  Hz, 1H, 19-*H*), 7.71 (dddd,  $J = 8.4, 6.9, 1.5, 0.5$  Hz, 1H, 17-*H*), 7.54 (dddd,  $J = 8.1, 6.9, 1.3, 0.5$  Hz, 1H, 18-*H*), 7.45 (dddd,  $J = 7.9, 7.3, 1.9, 0.5$  Hz, 1H, 14-*H*), 7.34 (tdd,  $J = 7.5, 1.3, 0.5$  Hz, 1H, 13-*H*), 7.17 (dd,  $J = 7.9, 1.3$  Hz, 1H, 15-*H*), 4.59 (t,  $J = 6.3$  Hz, 2H,  $\text{CH}_2\text{-O}$ ), 3.01 (t,  $J = 6.3$ , 2H,  $\text{CH}_2\text{-C}$ );  $^{13}\text{C}$  NMR (75 MHz,  $\text{CDCl}_3$ )  $\delta$  158.1, 155.0, 147.8, 134.7, 134.4, 131.3, 131.1, 130.4, 129.7, 129.2, 127.6, 127.2, 126.6, 125.0, 122.3, 76.3, 32.7; Anal. Calcd. for  $\text{C}_{17}\text{H}_{13}\text{NO}$ : % C 82.57; H 5.30; N 5.66; O 6.47, found: C 82.63; H 5.29; N 5.64; O 6.49.

## Copies of $^1\text{H}$ - and $^{13}\text{C}$ -NMR Spectra of Compounds

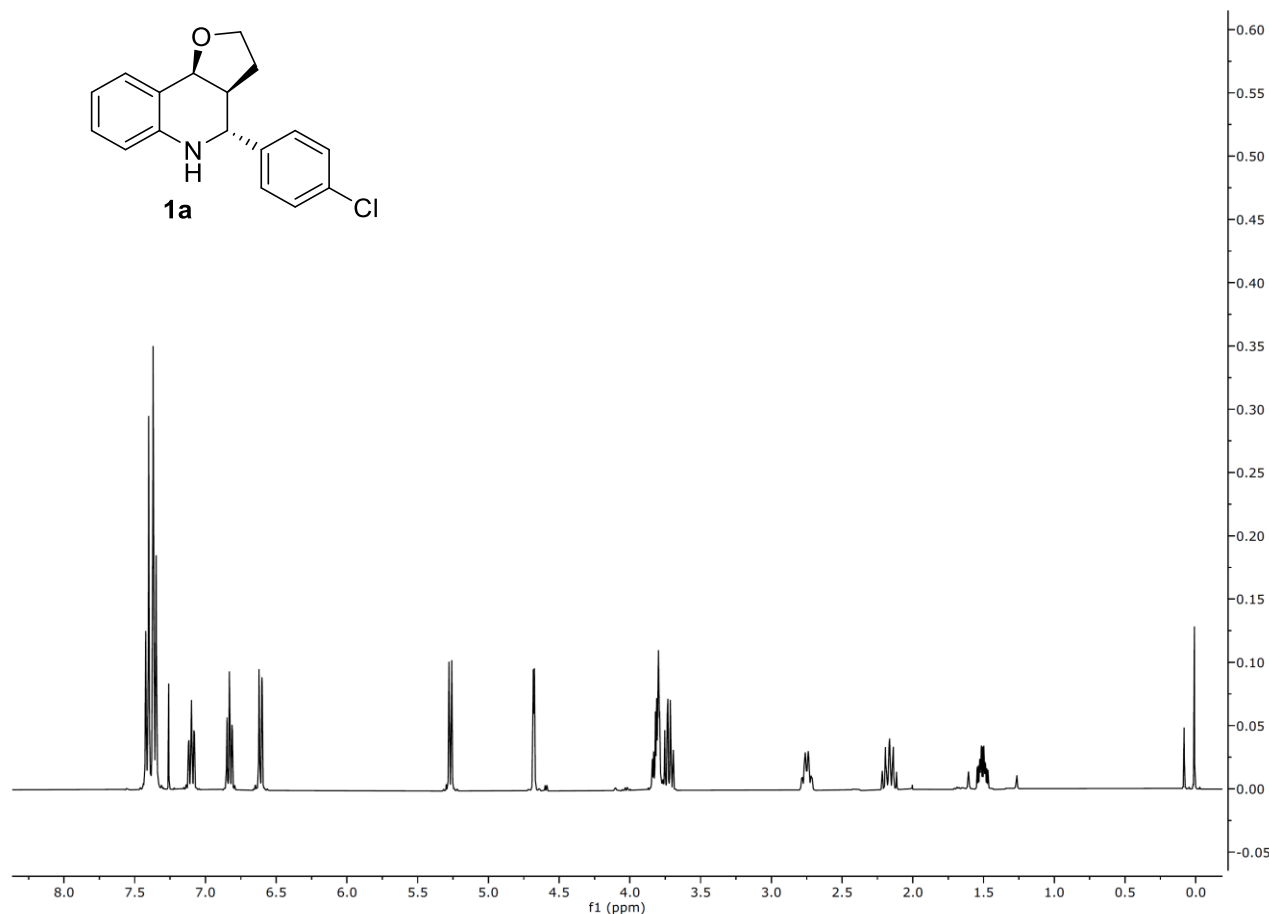

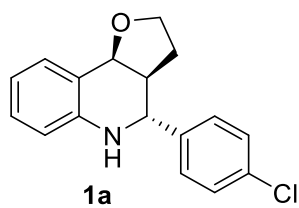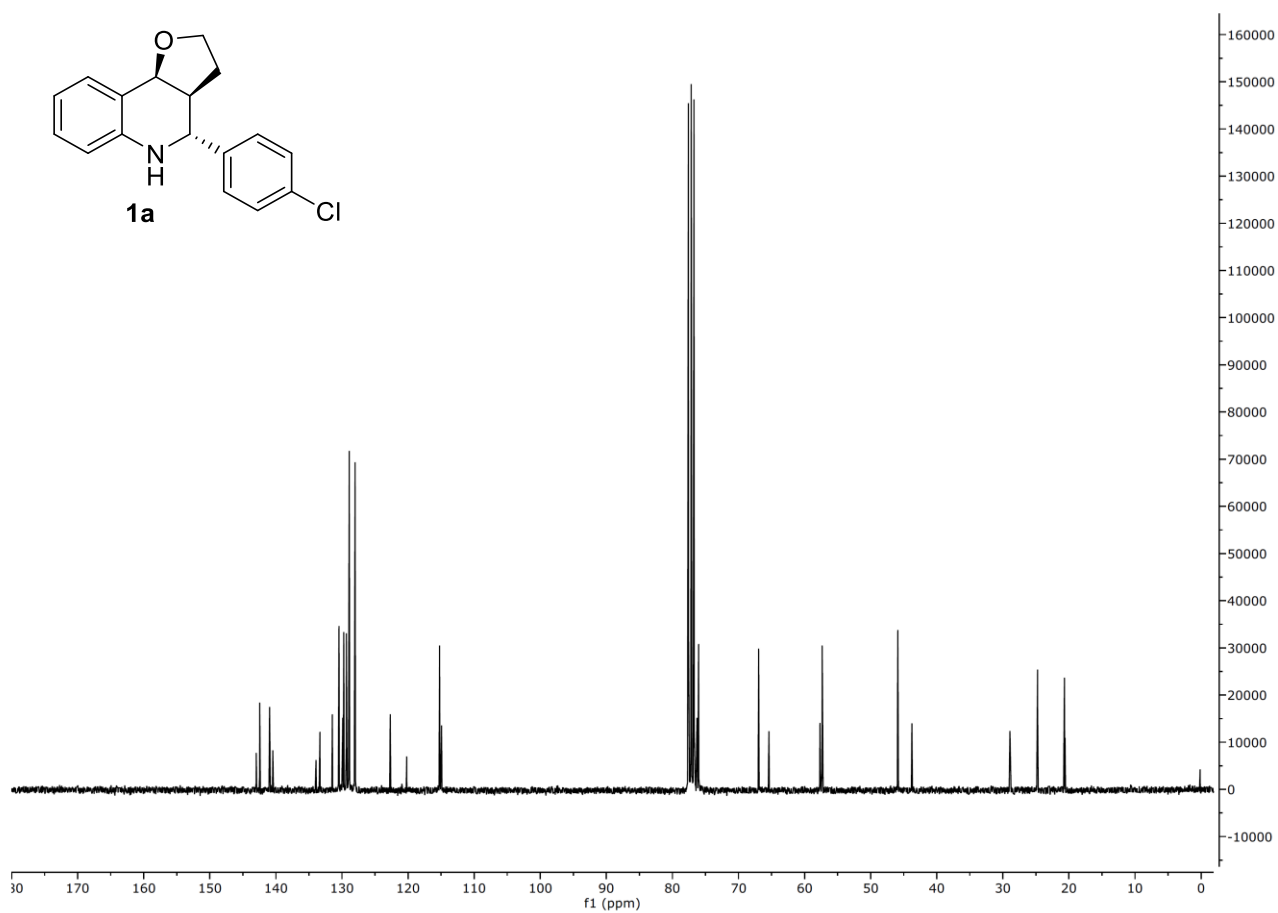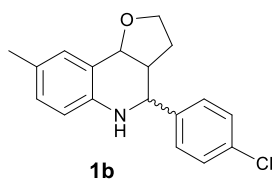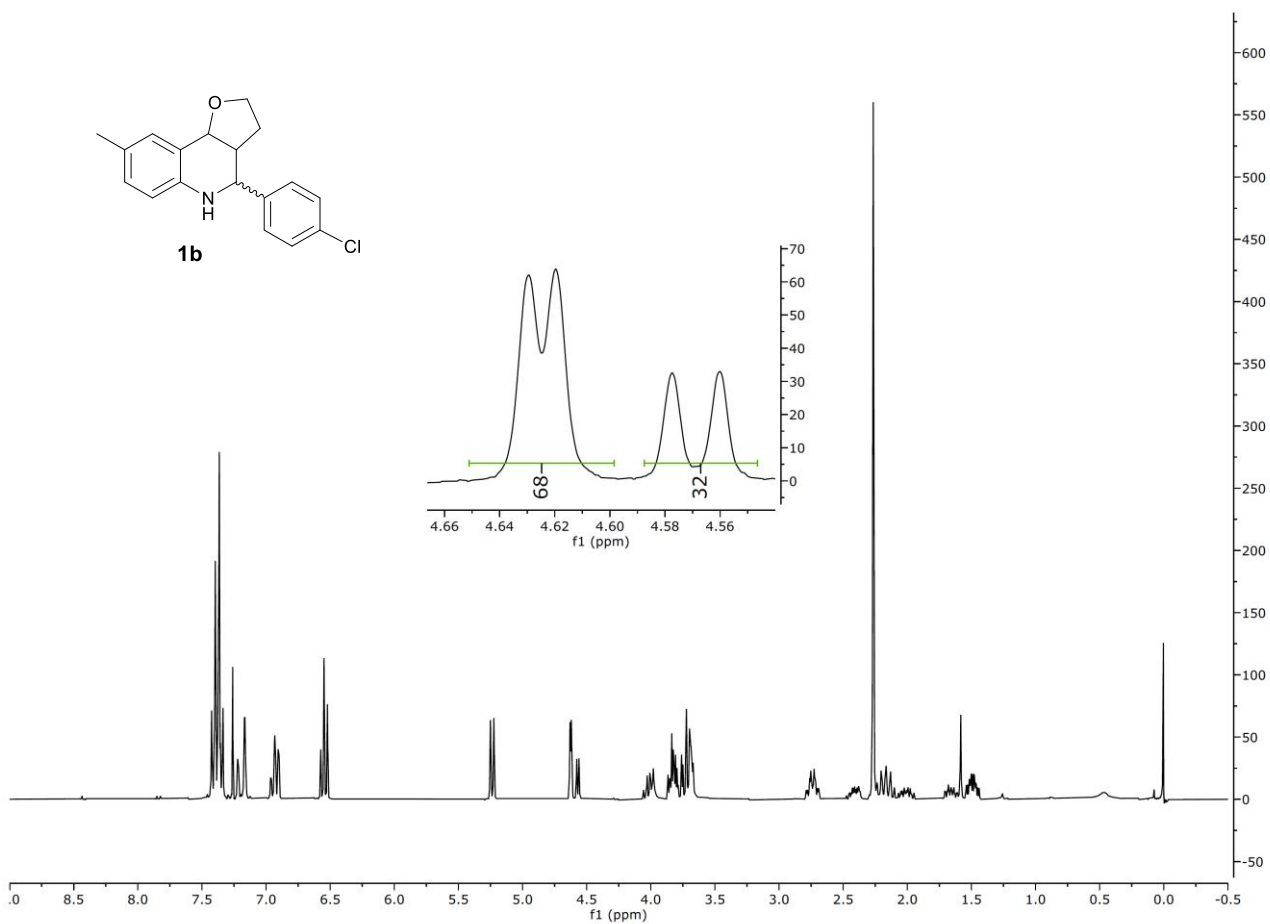

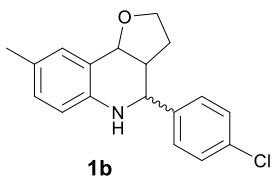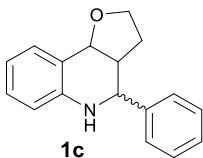



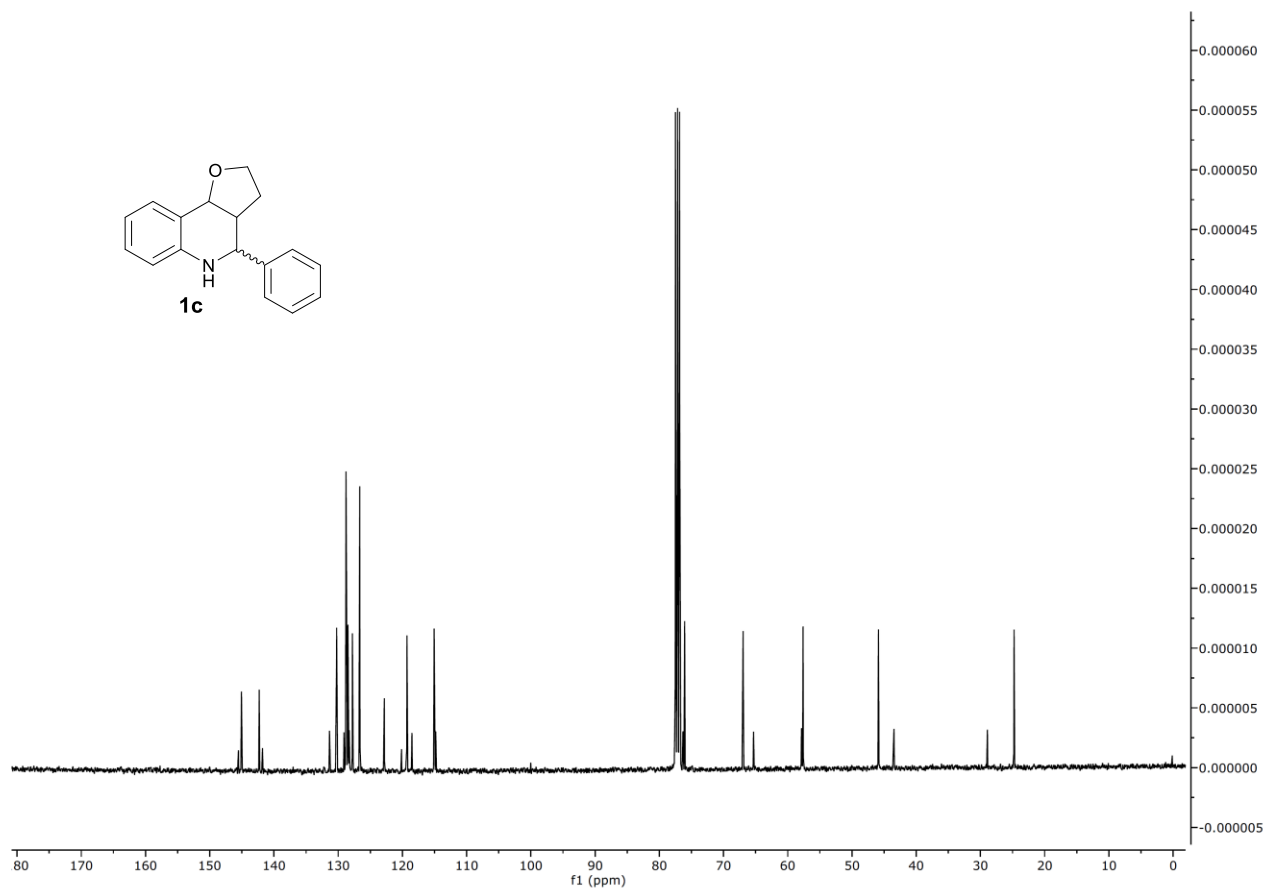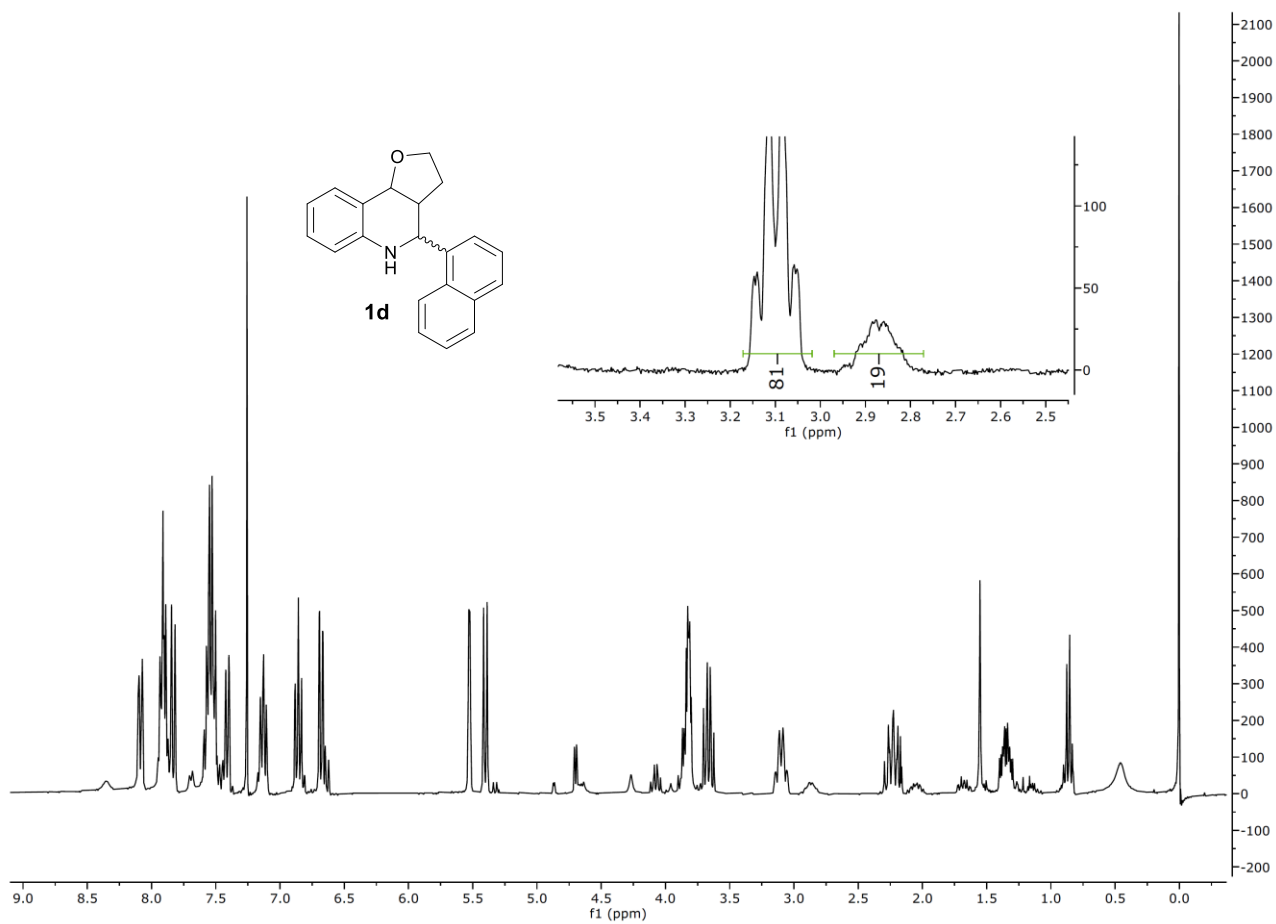

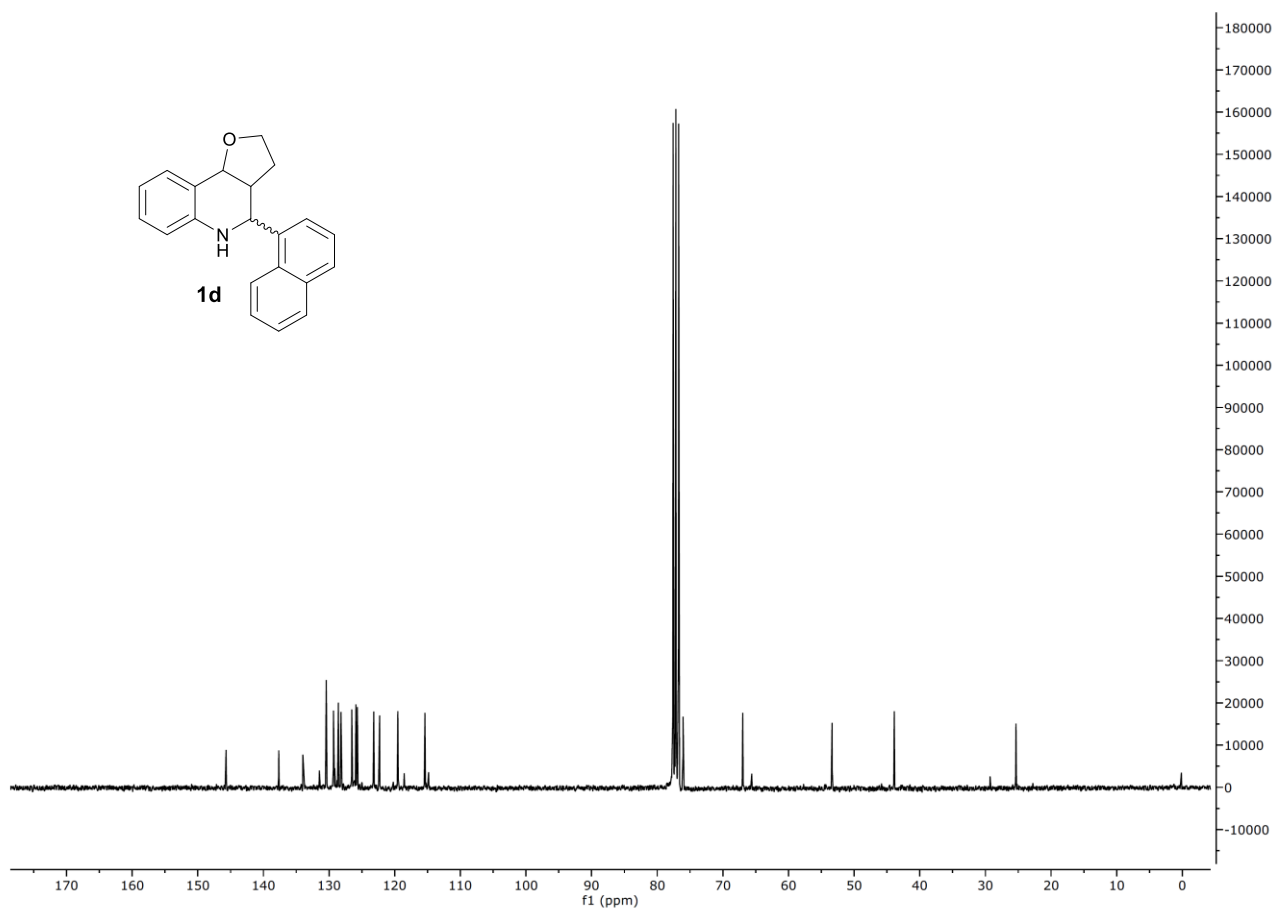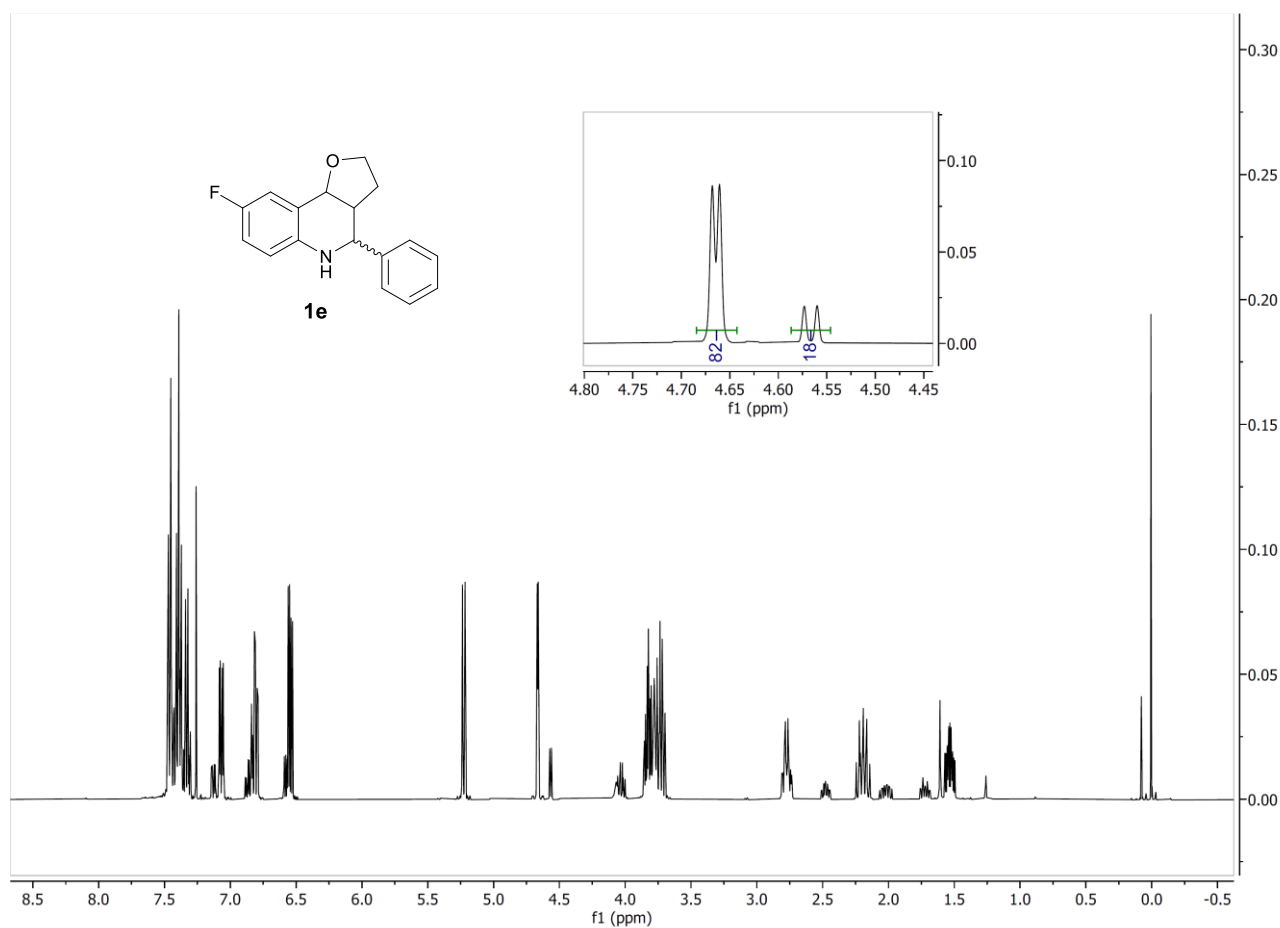

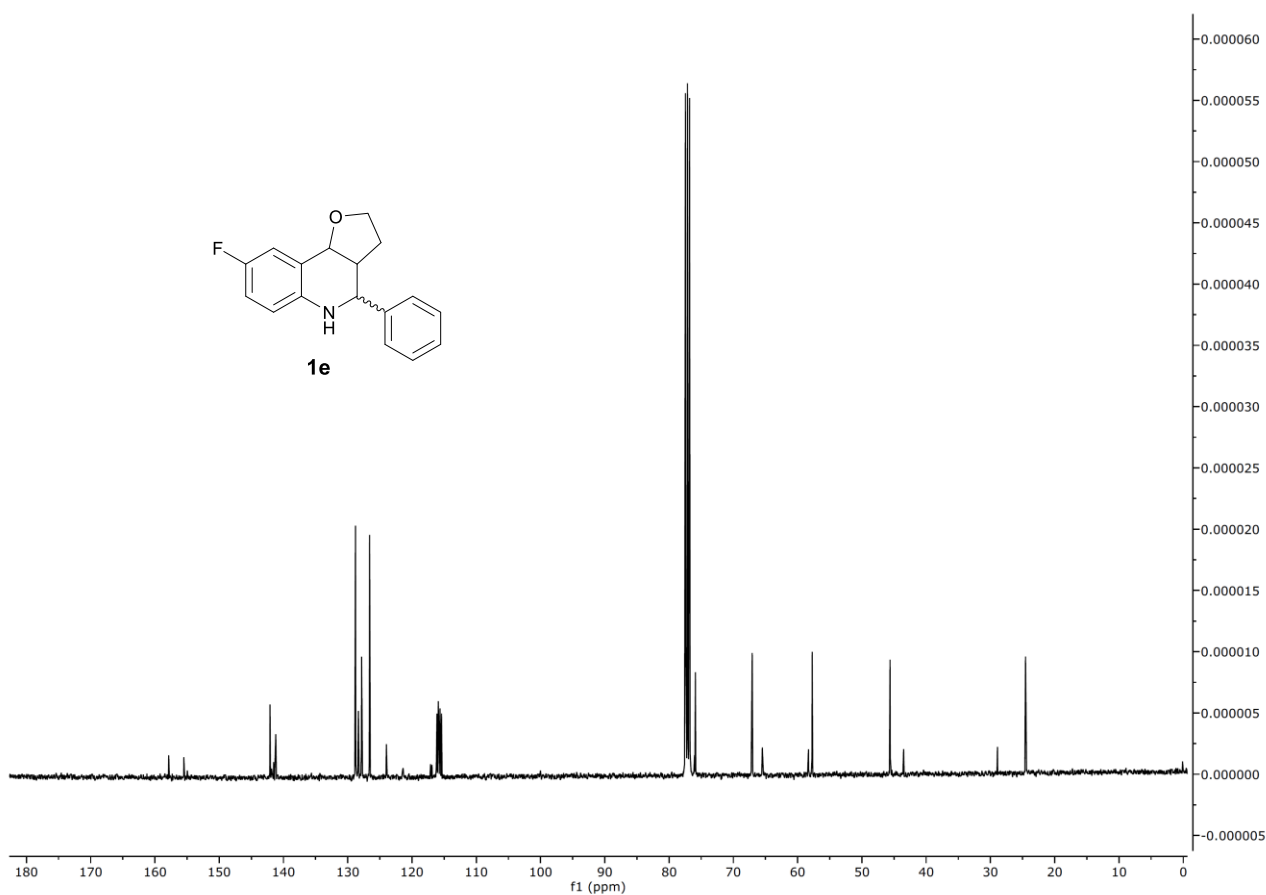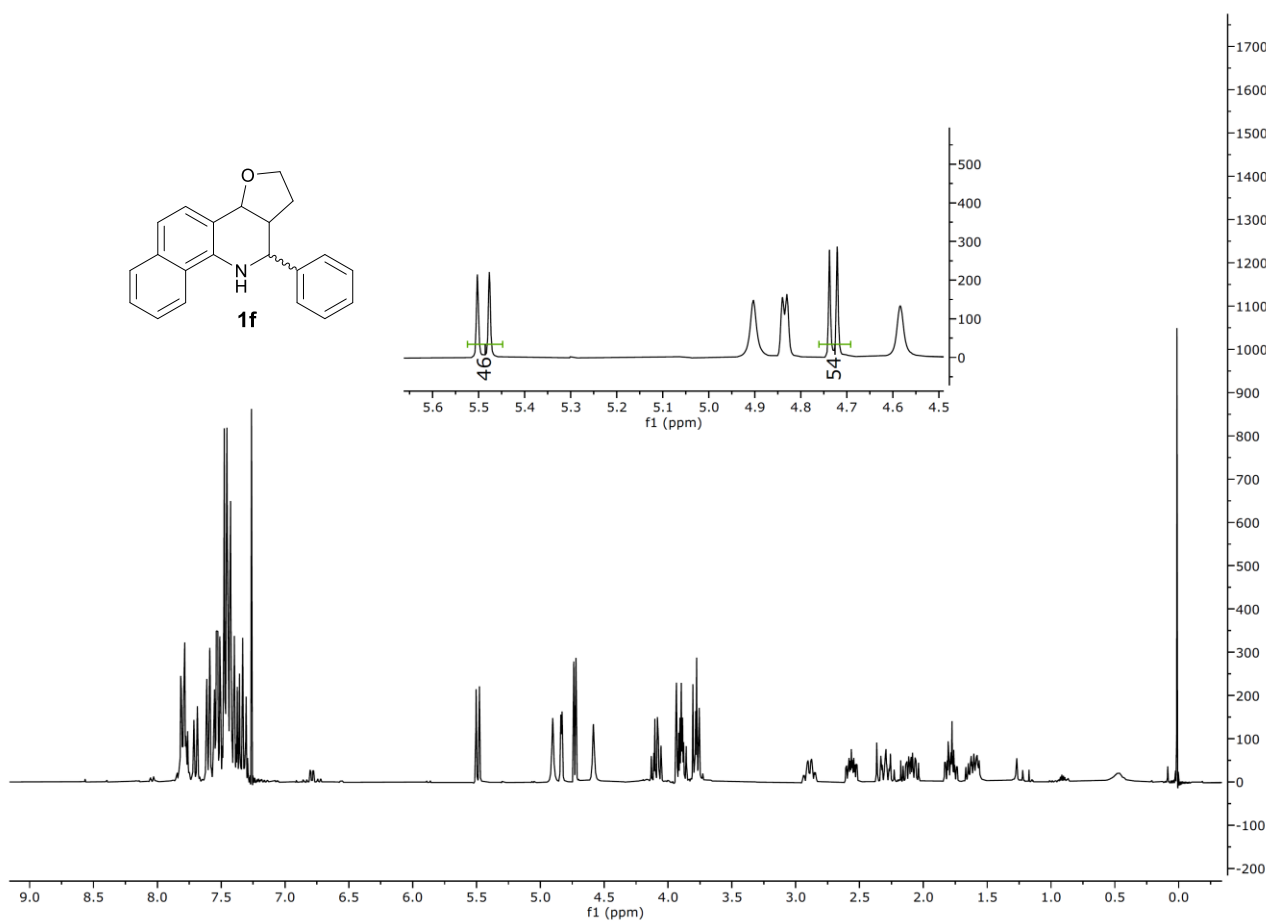

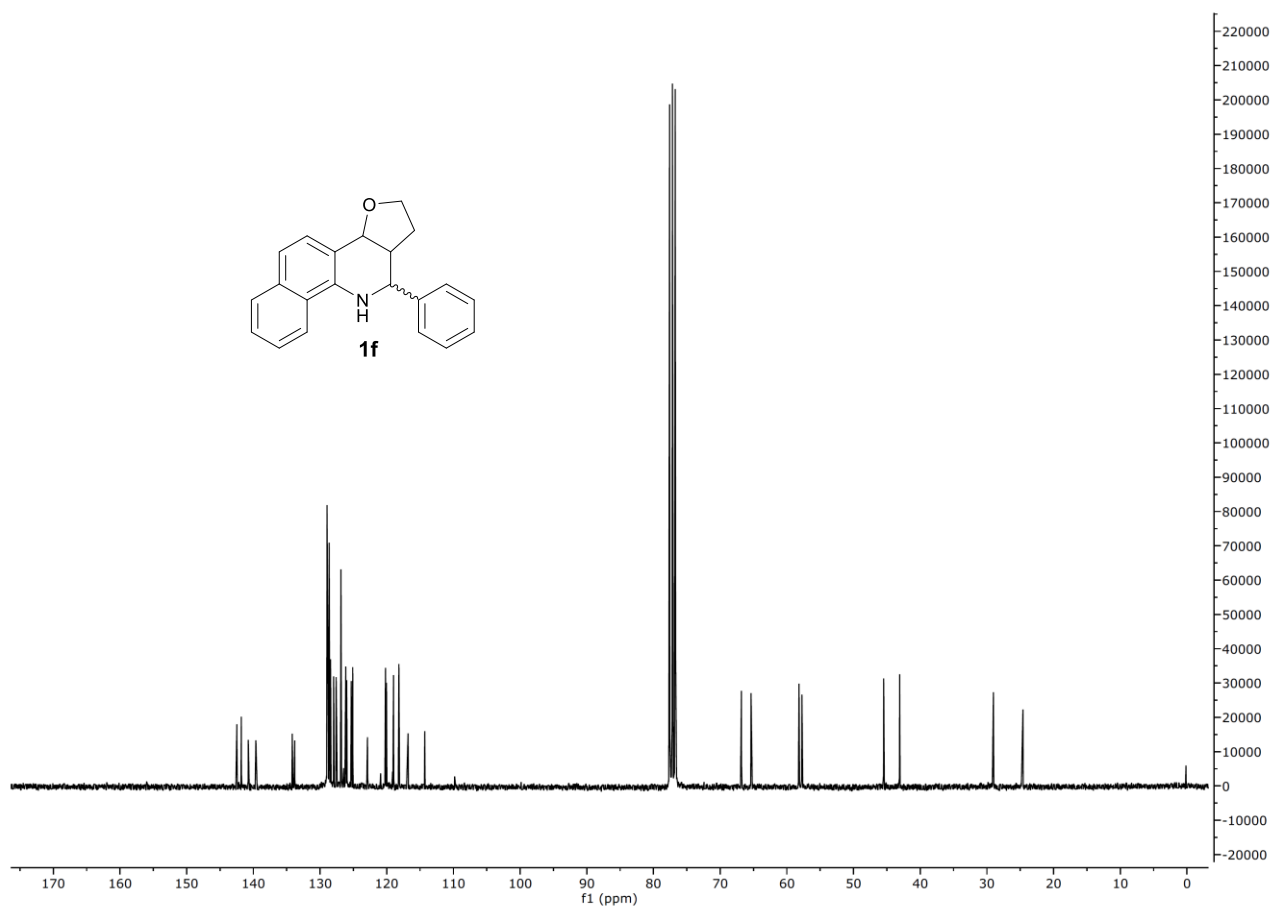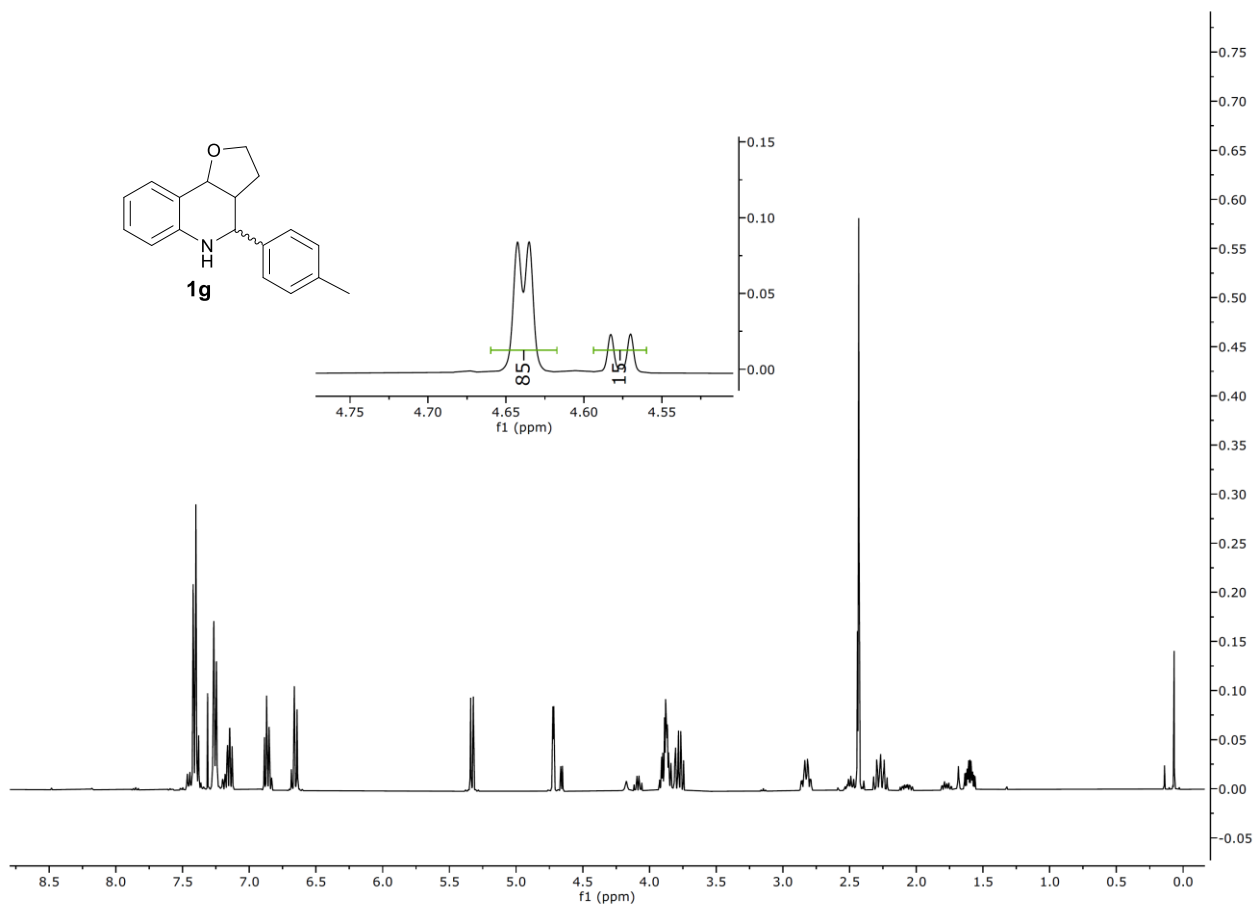

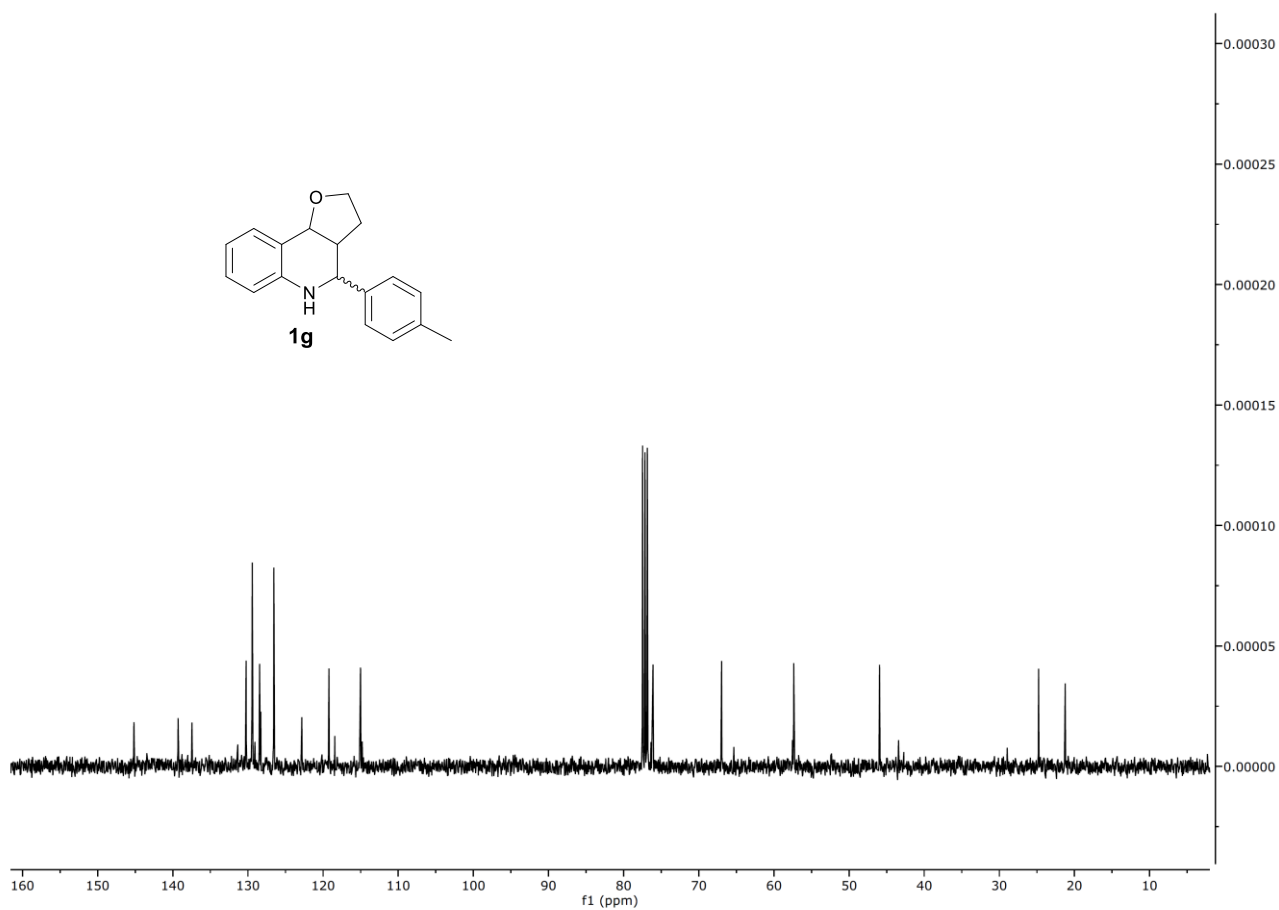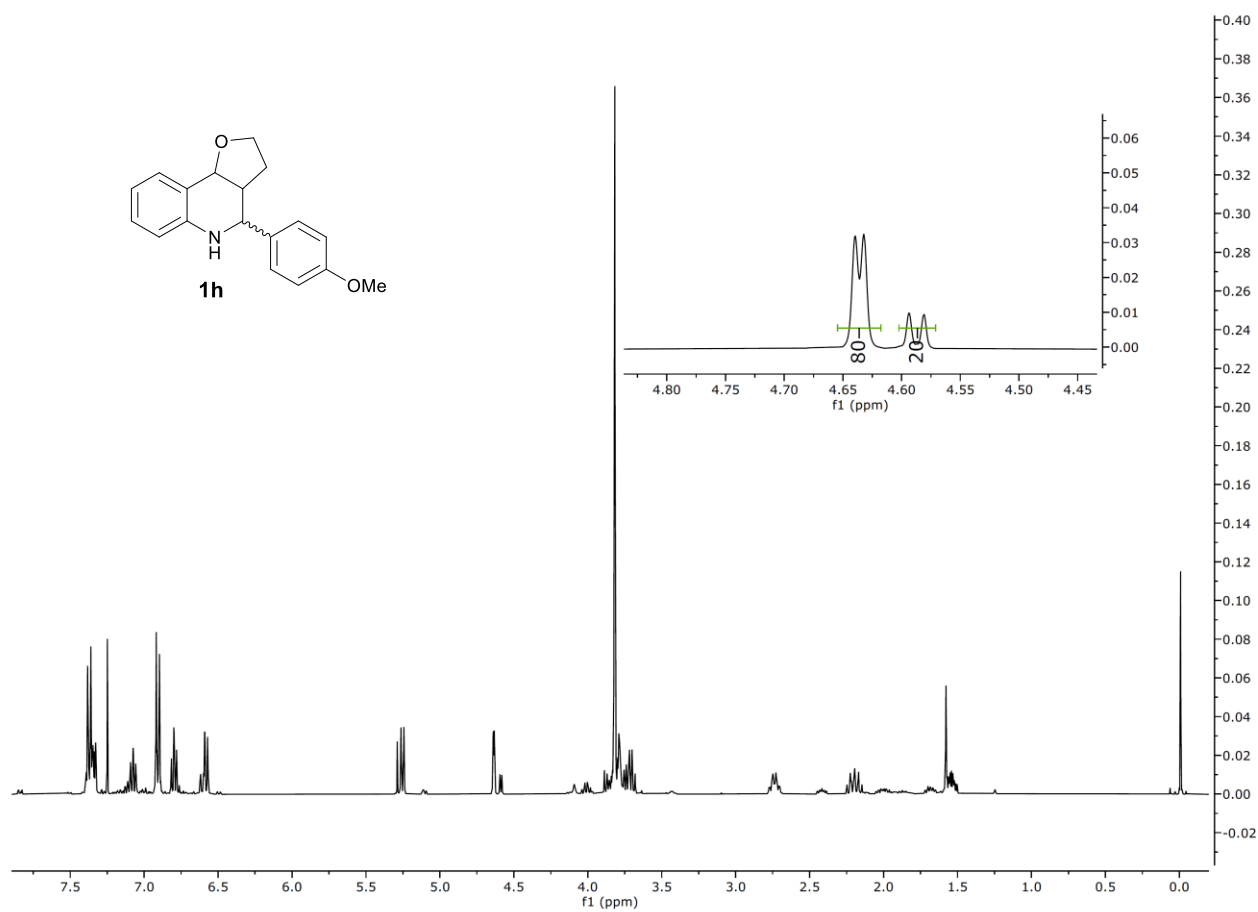

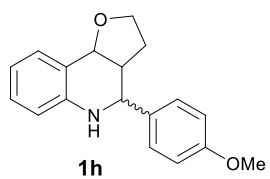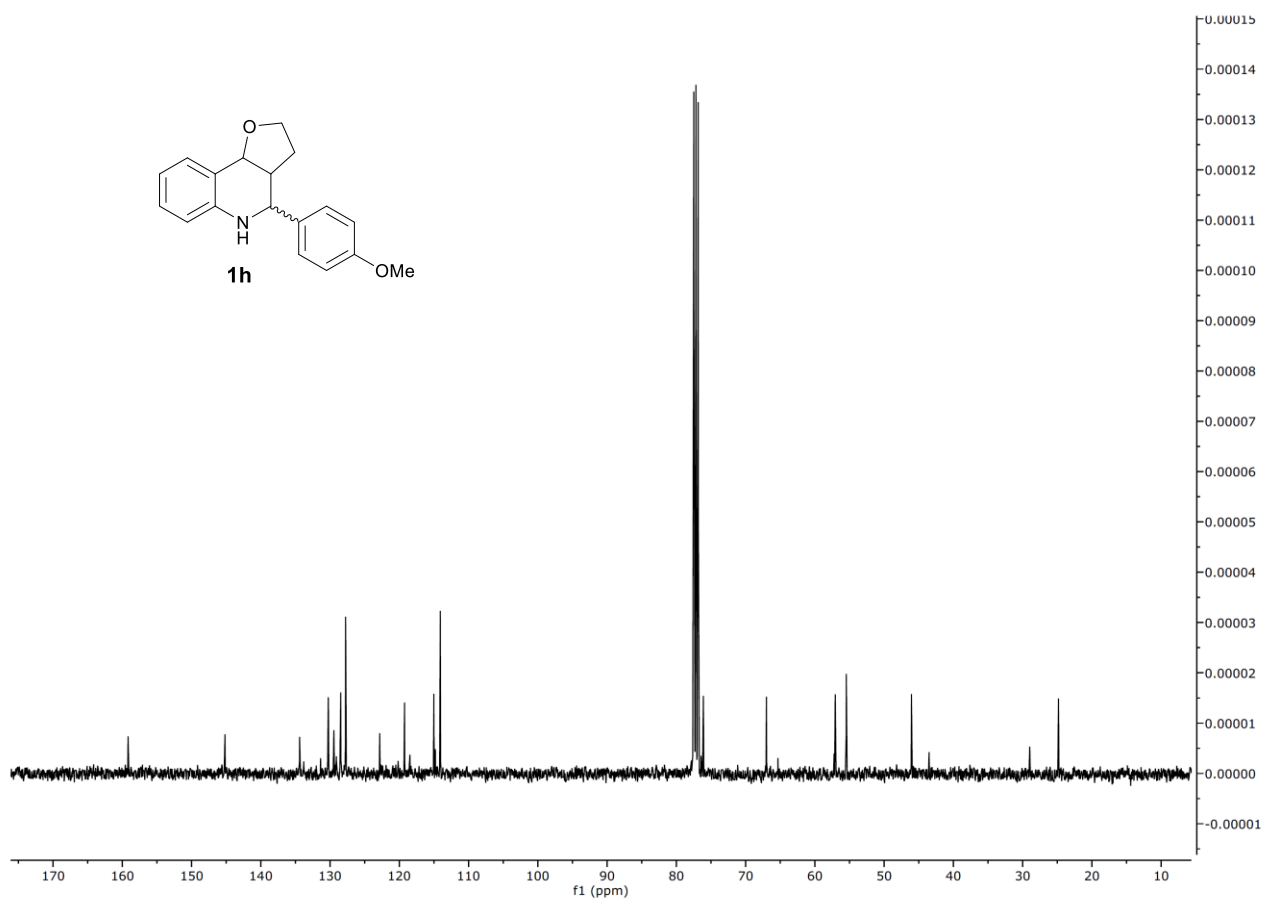

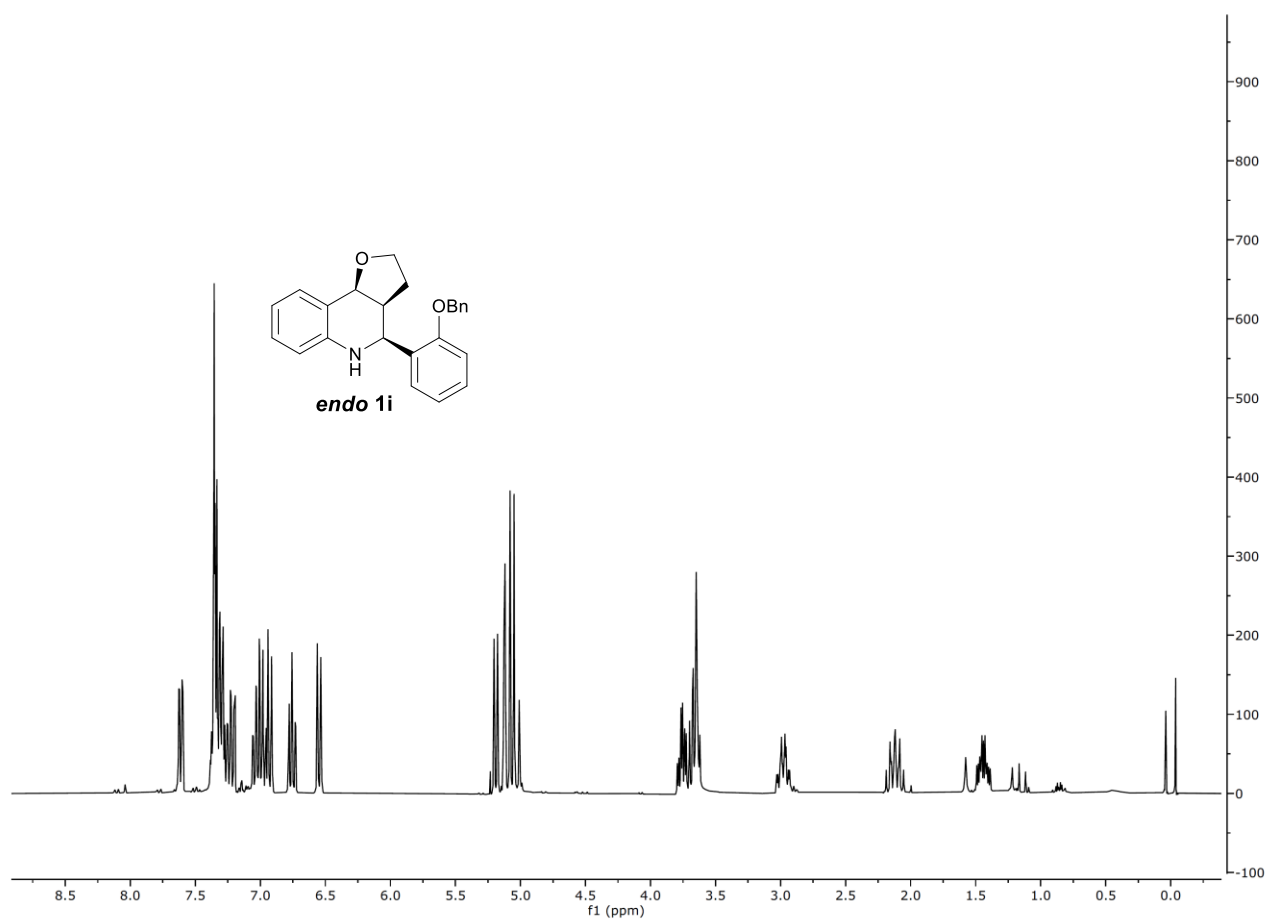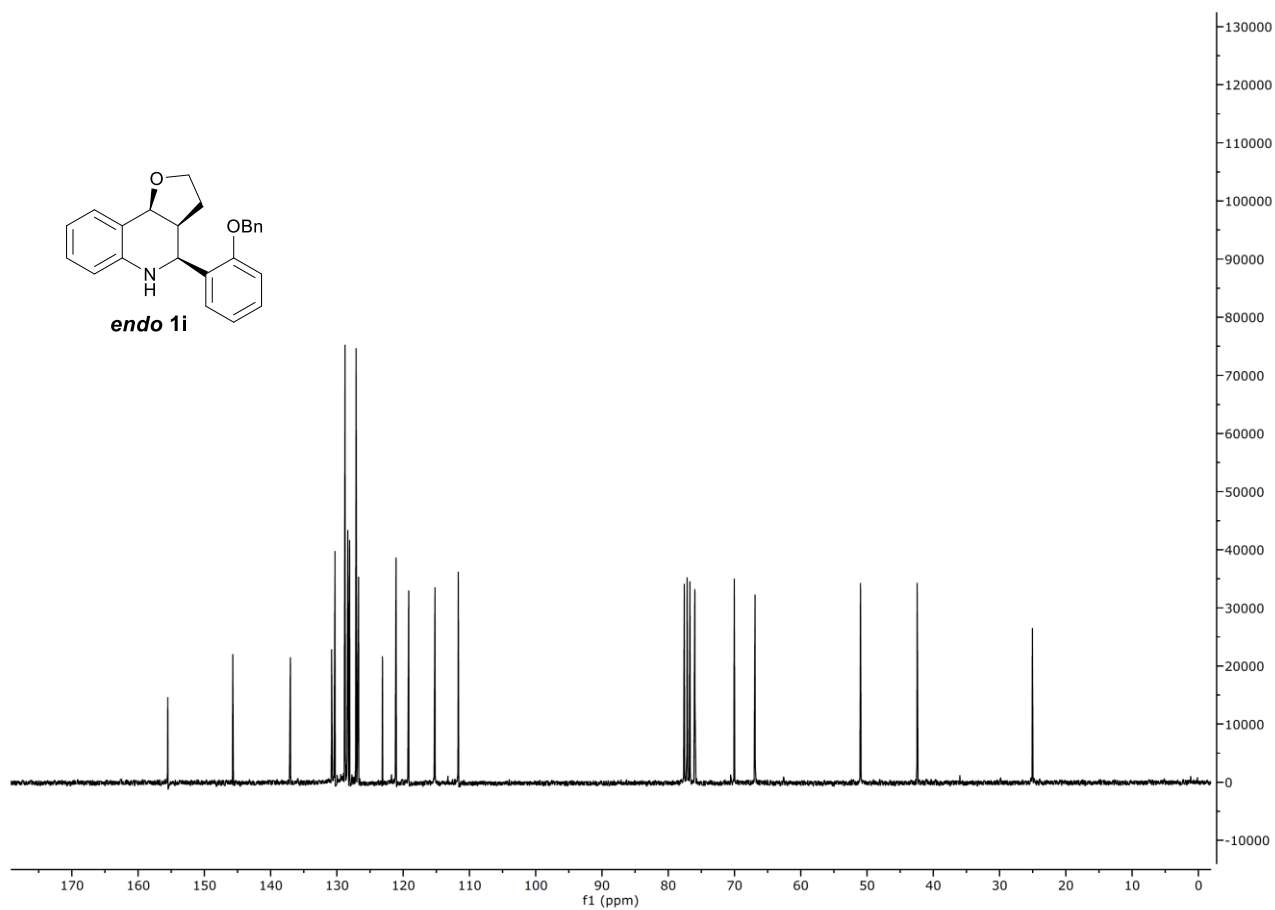

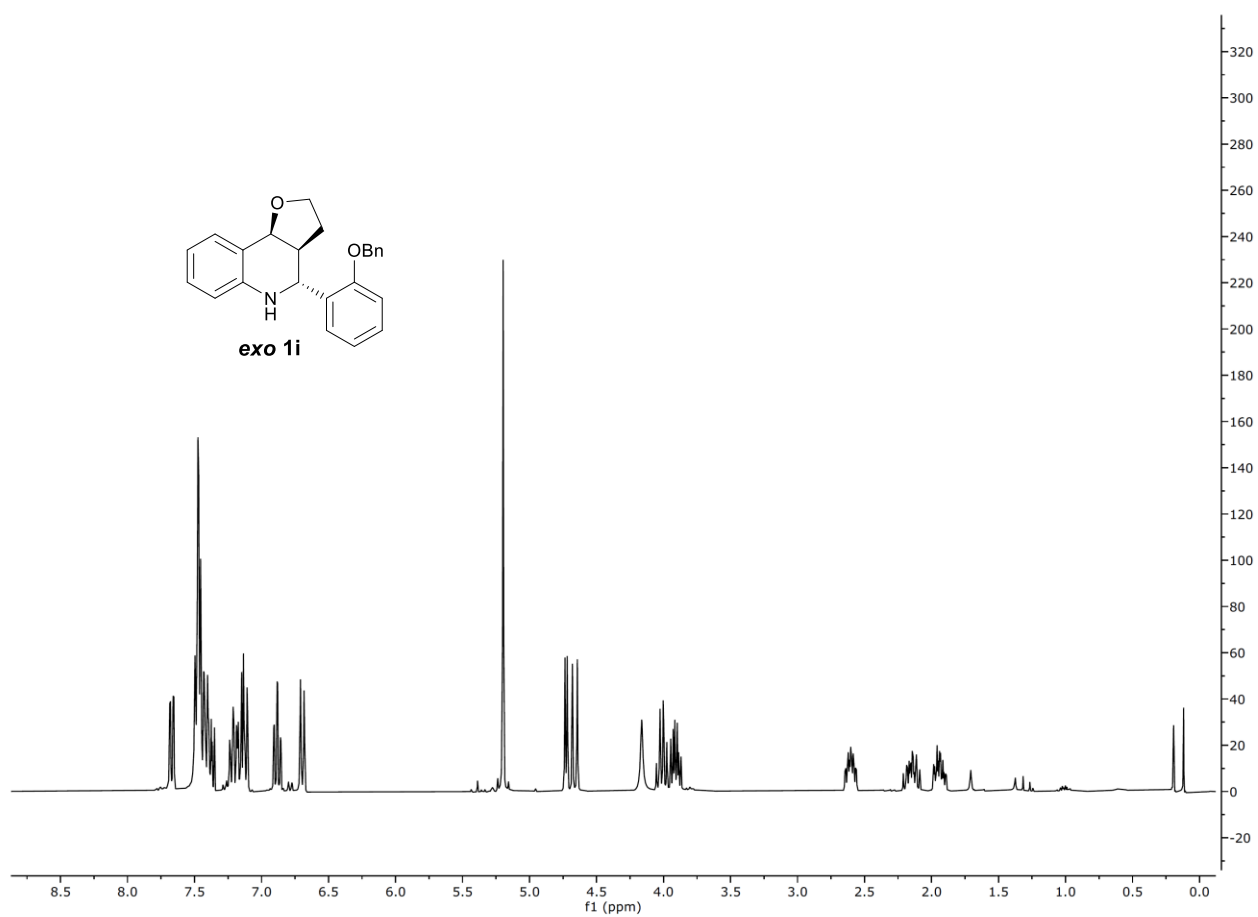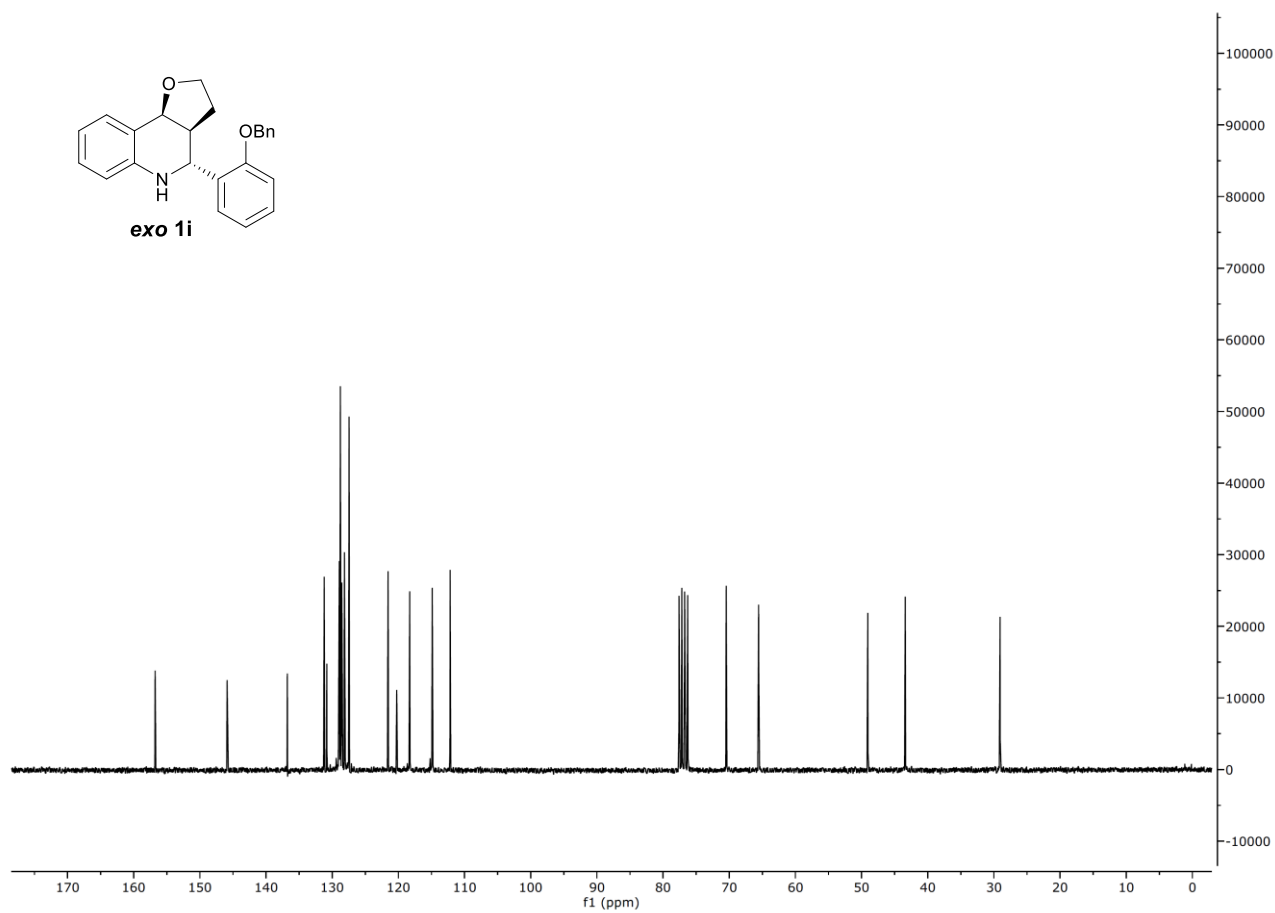



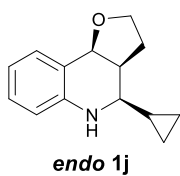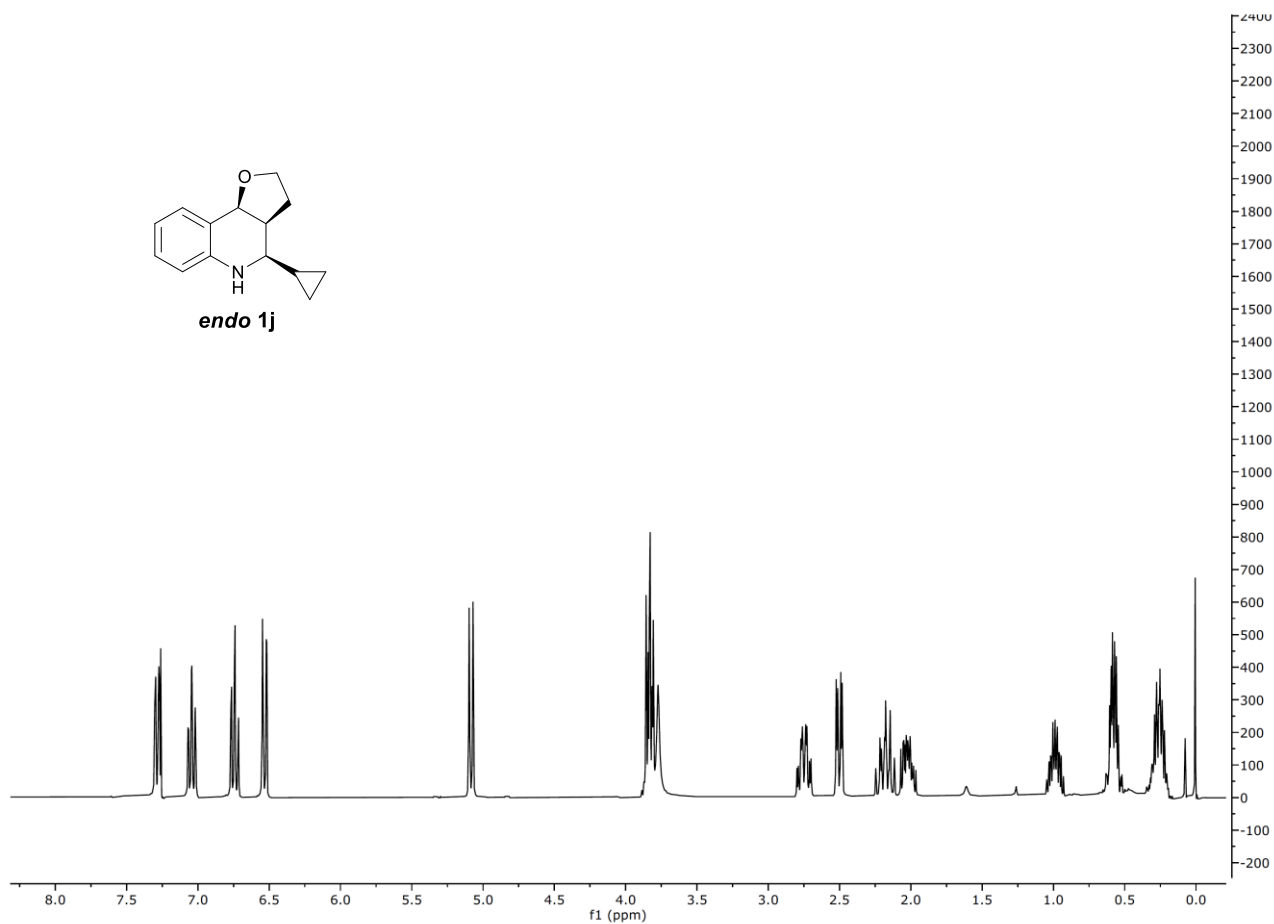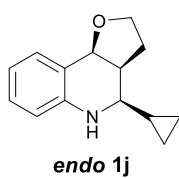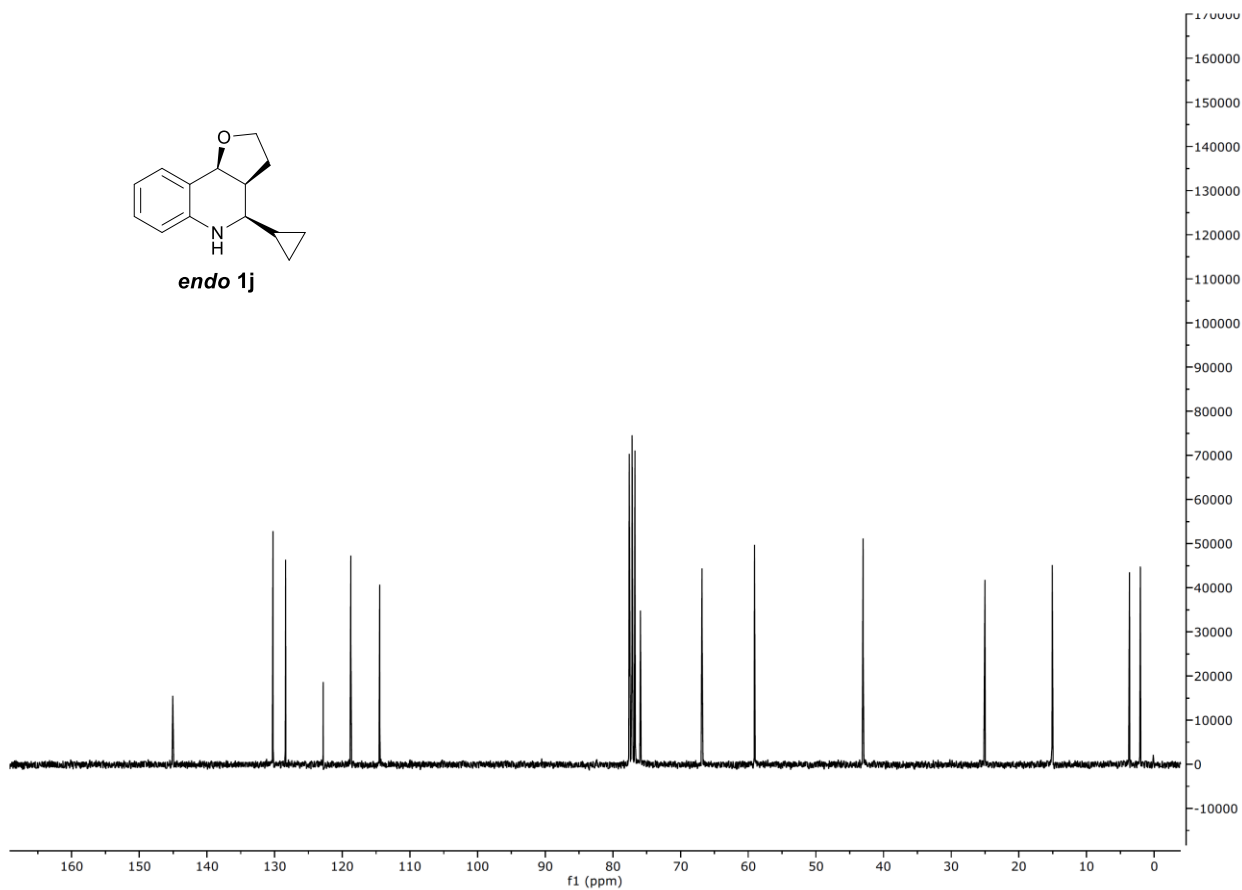

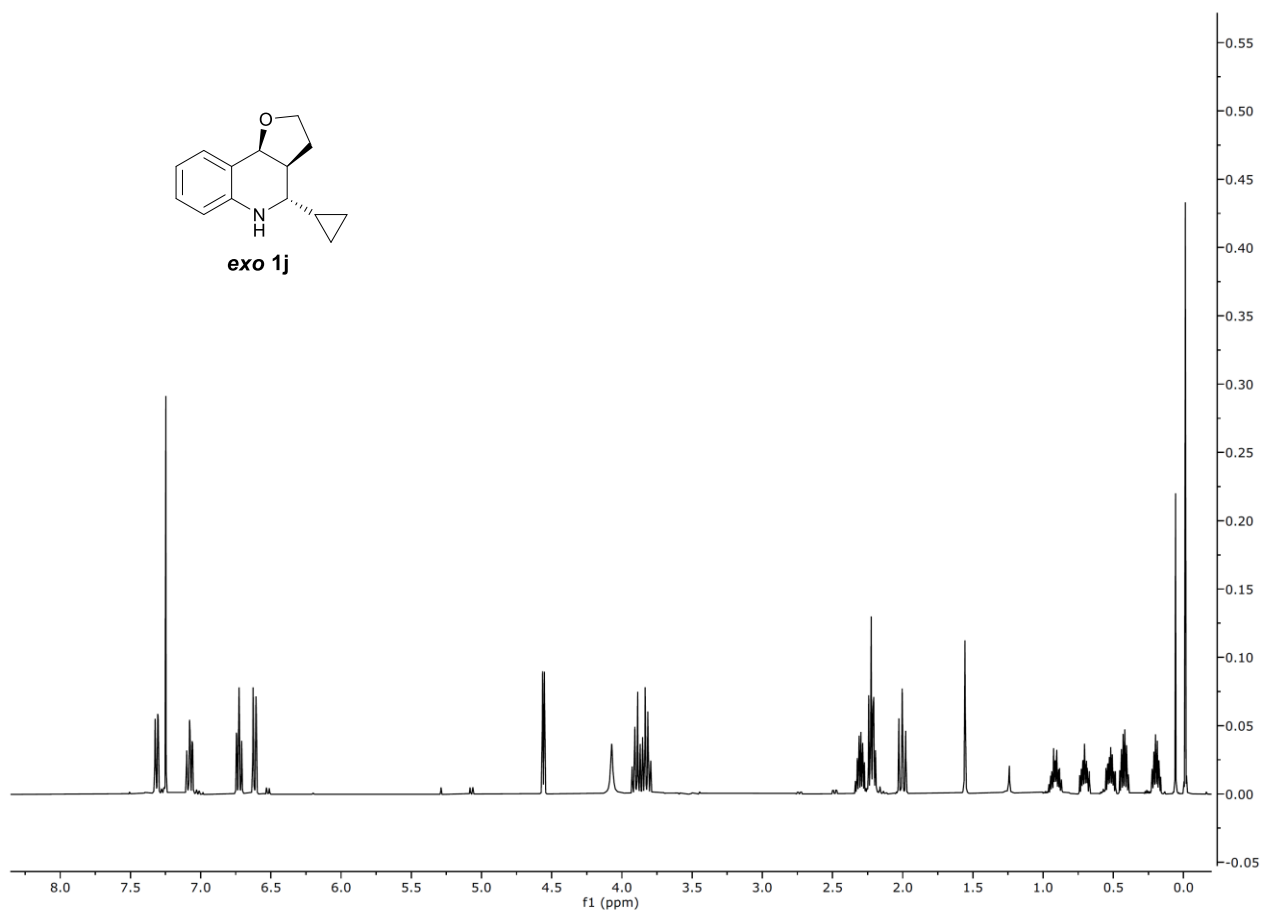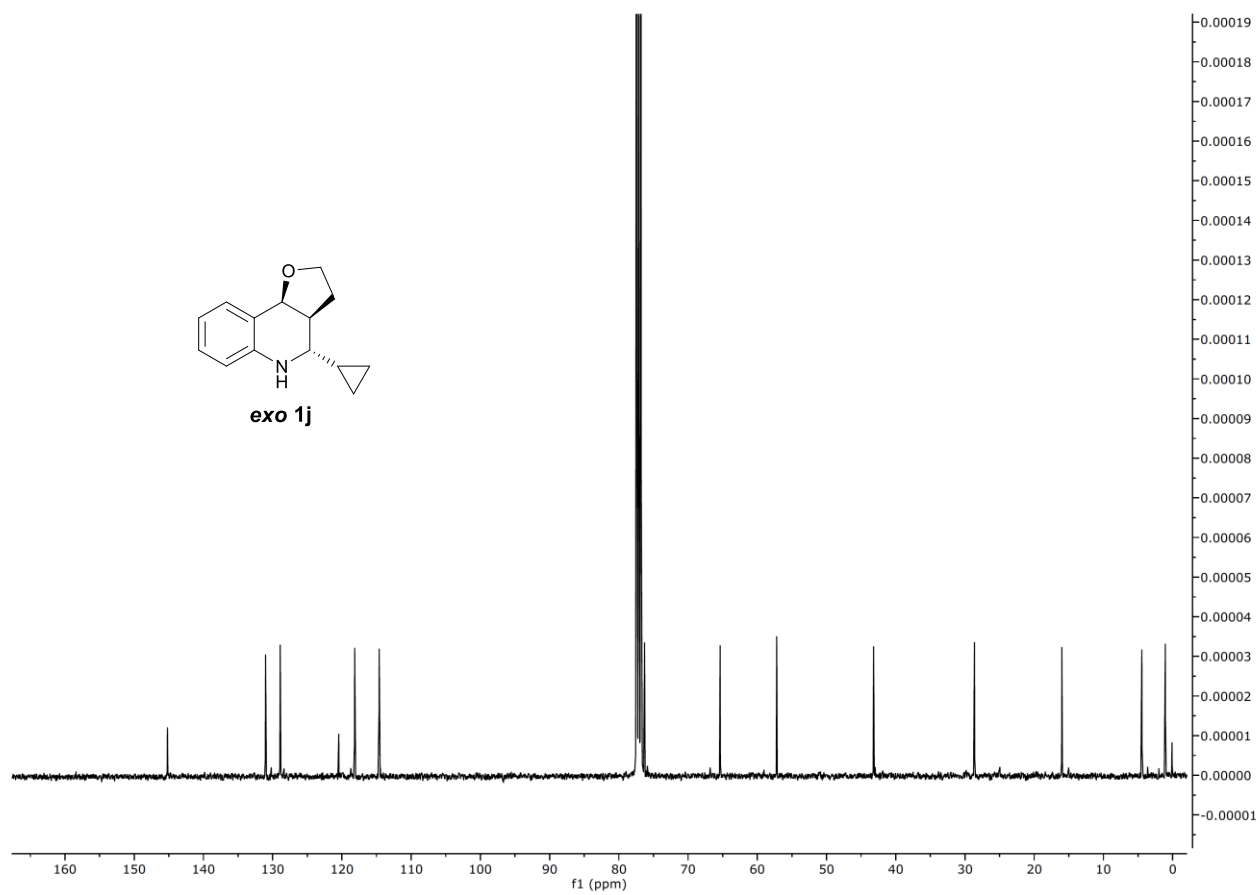

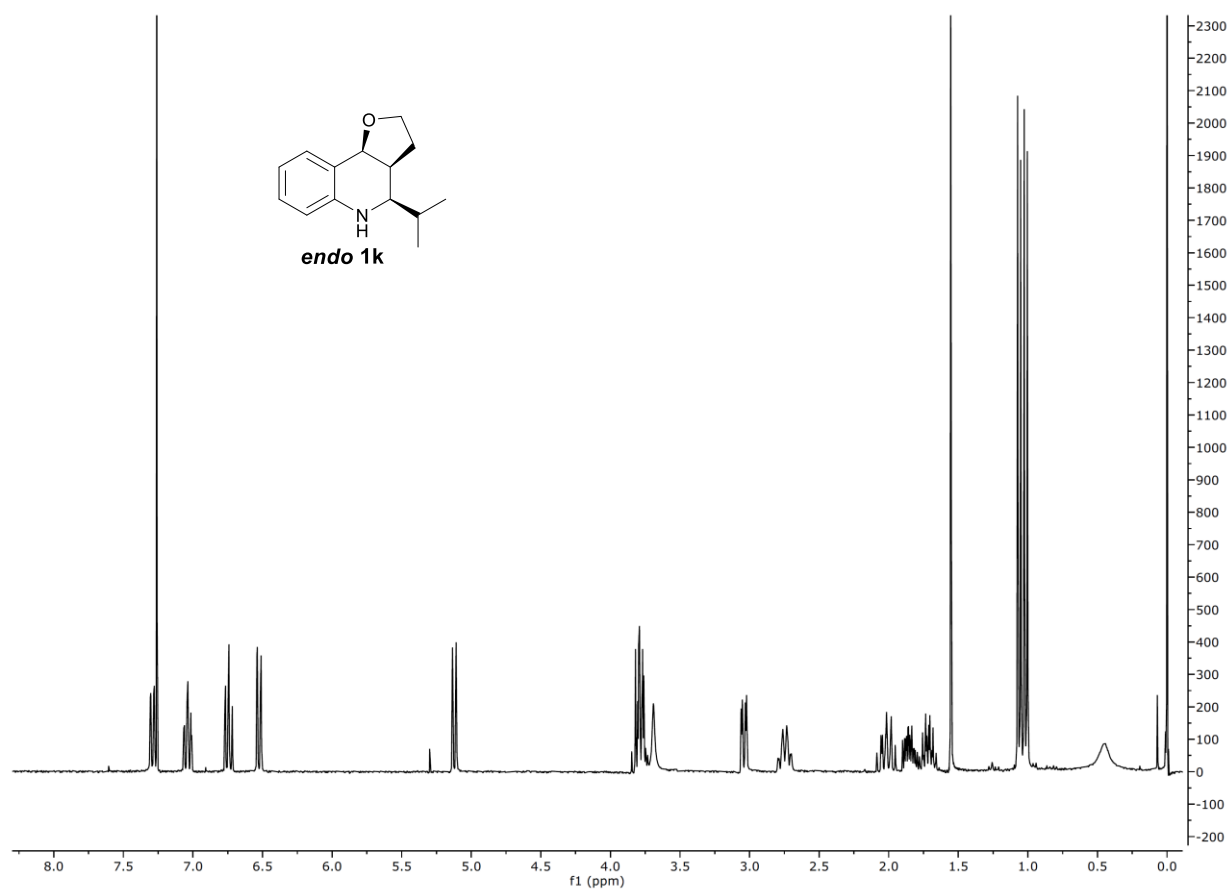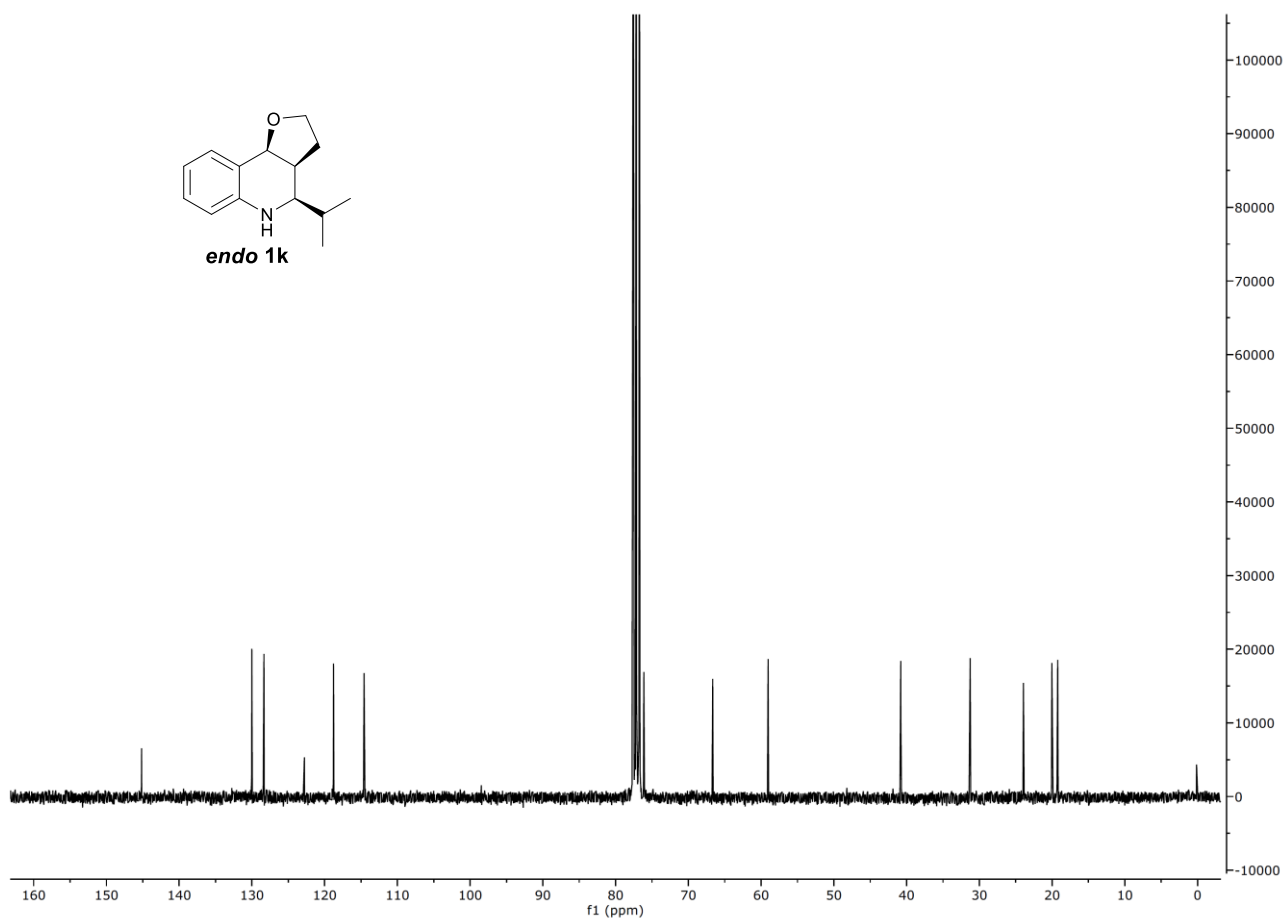

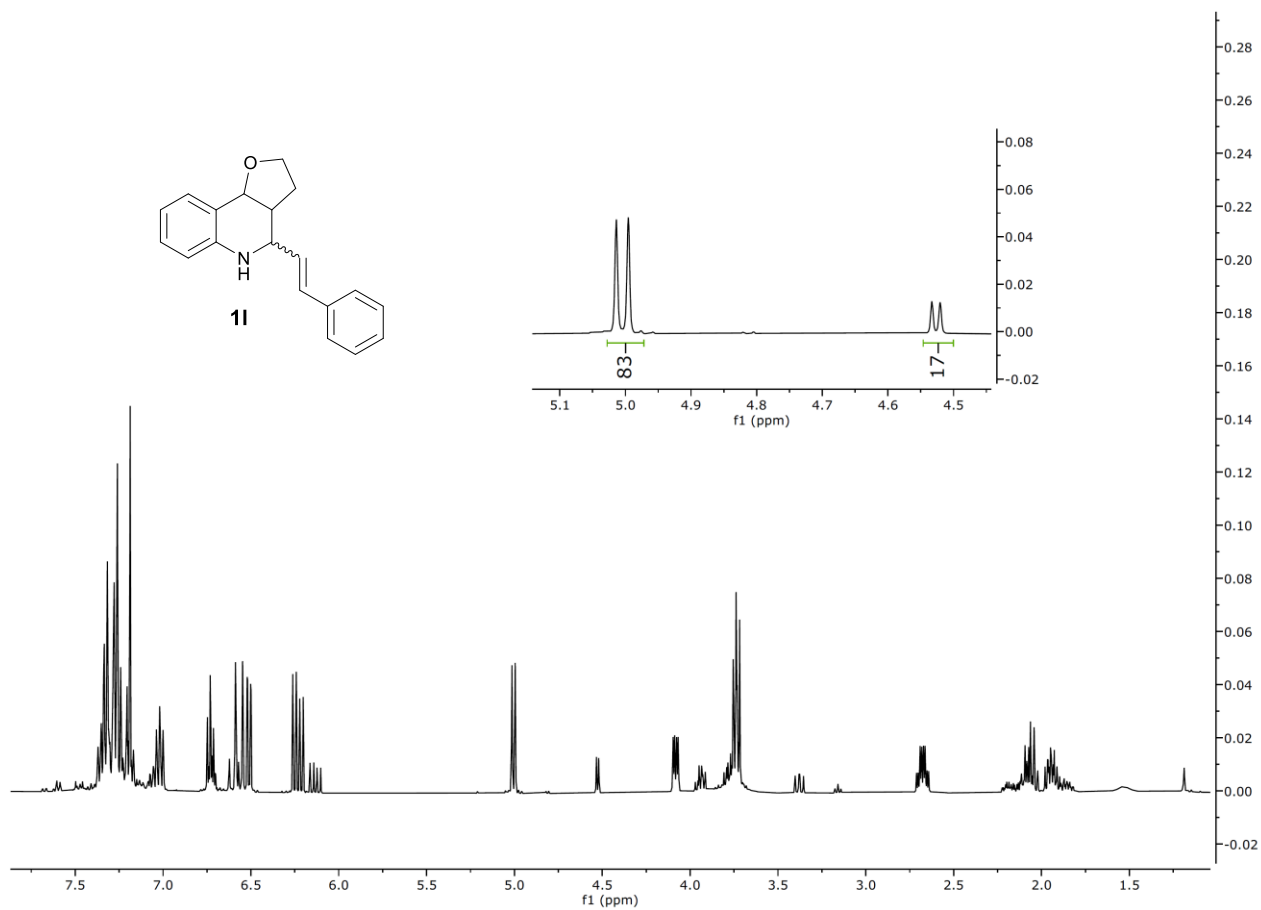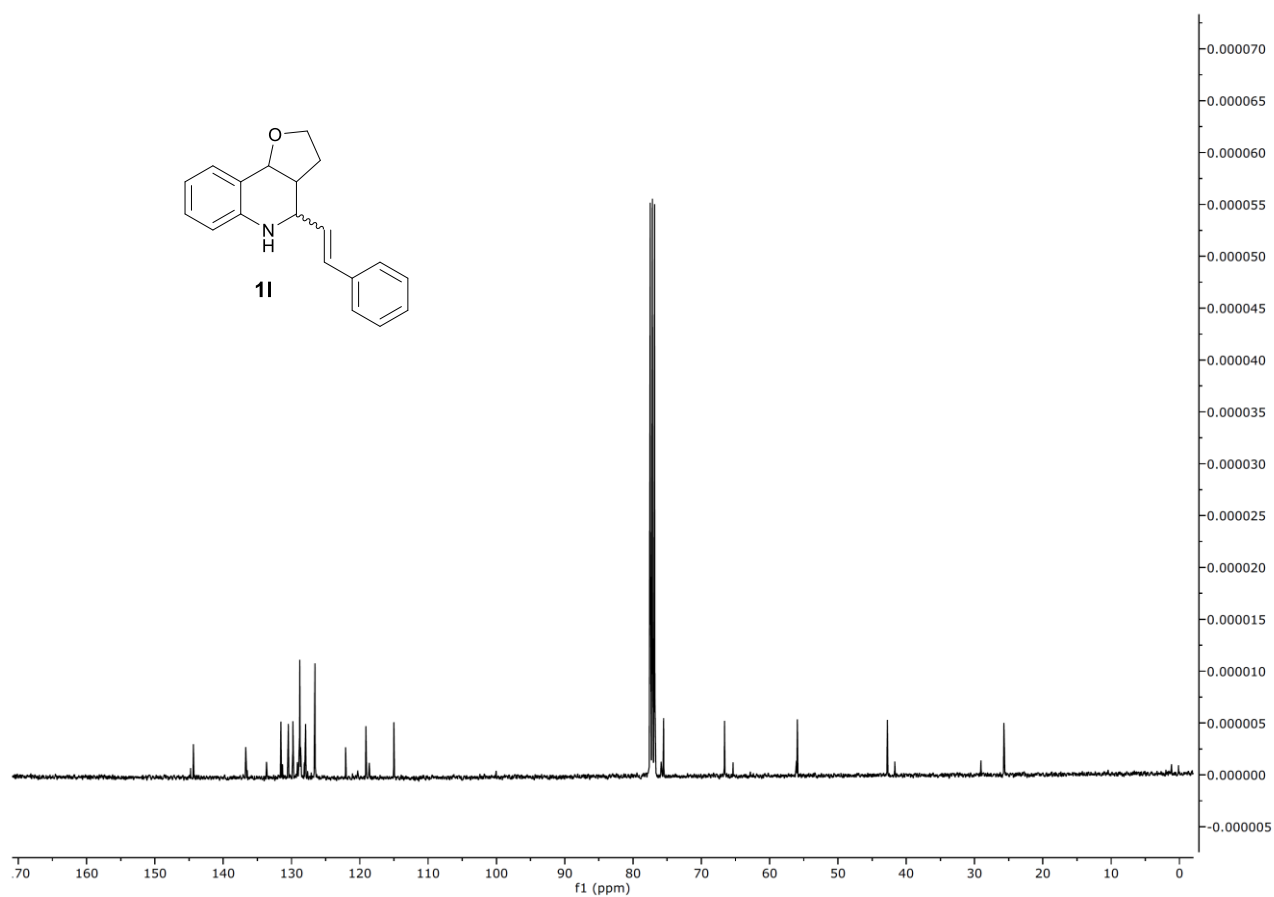

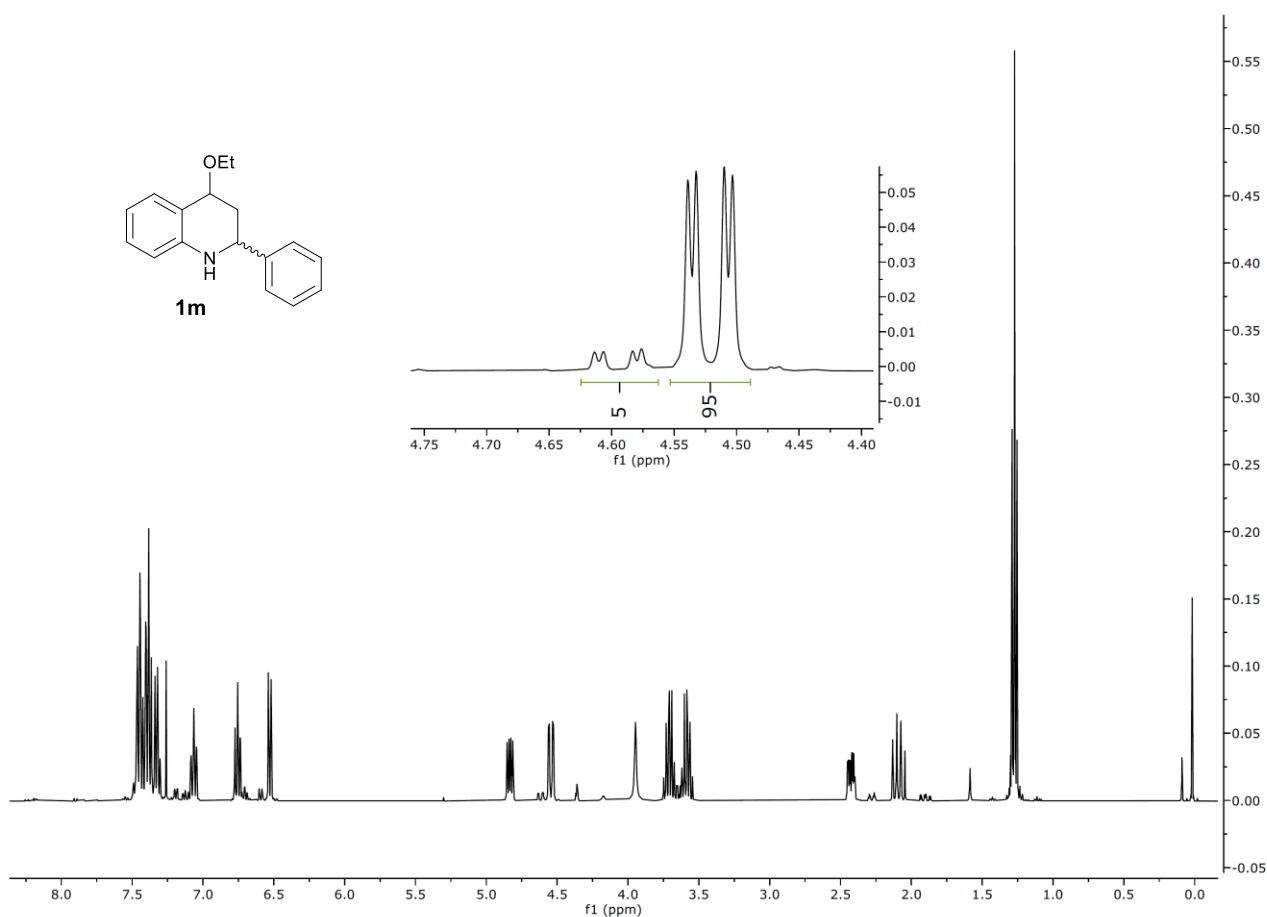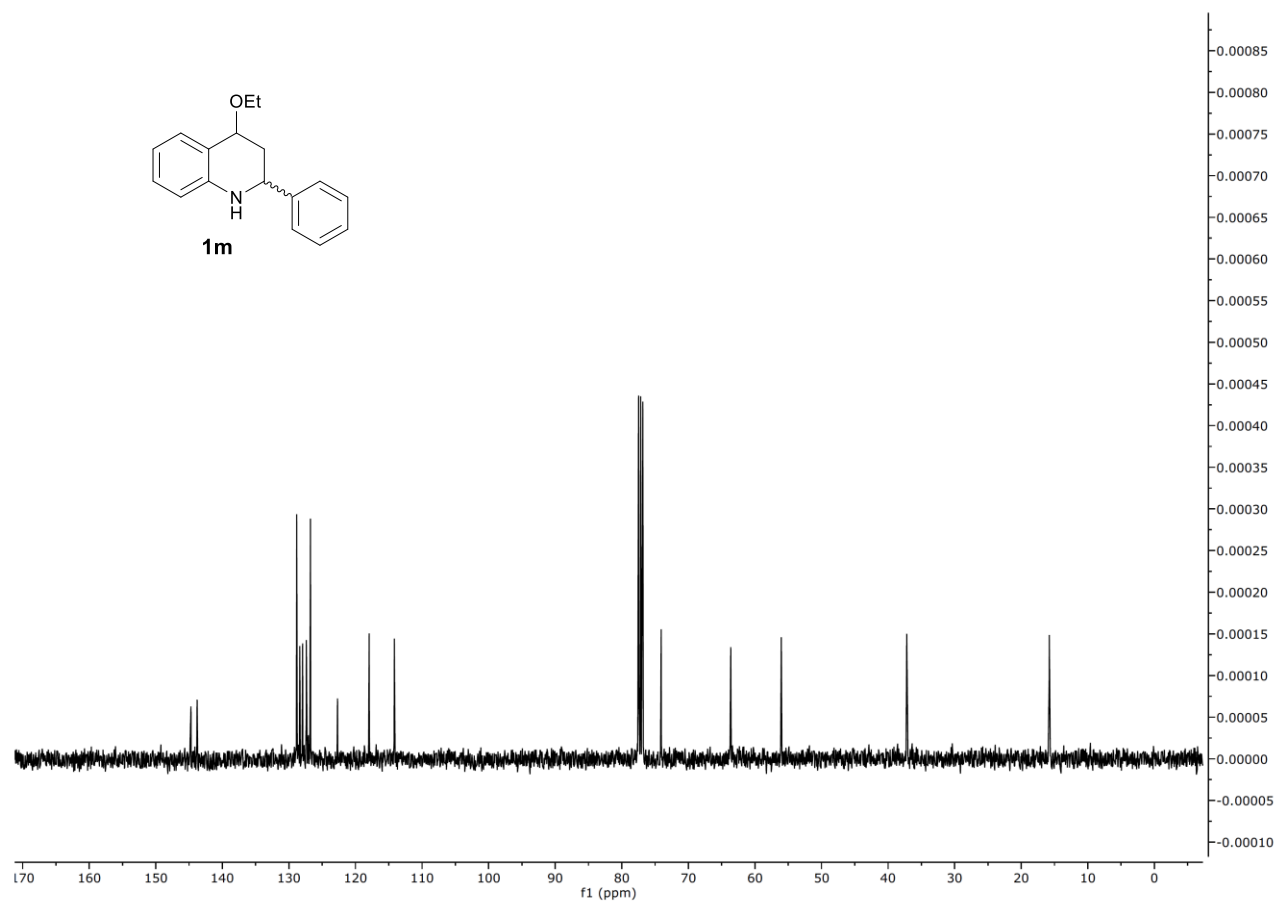

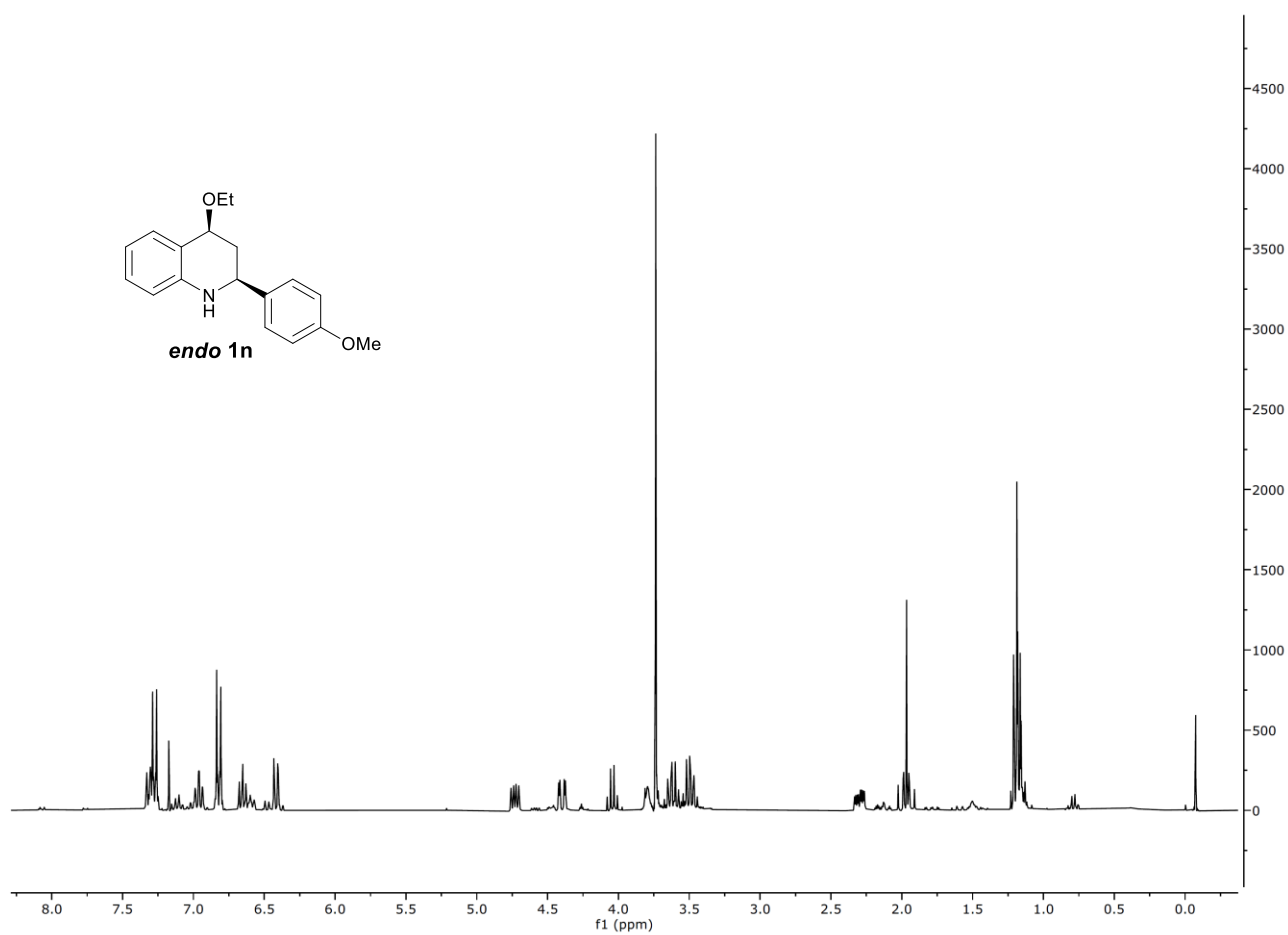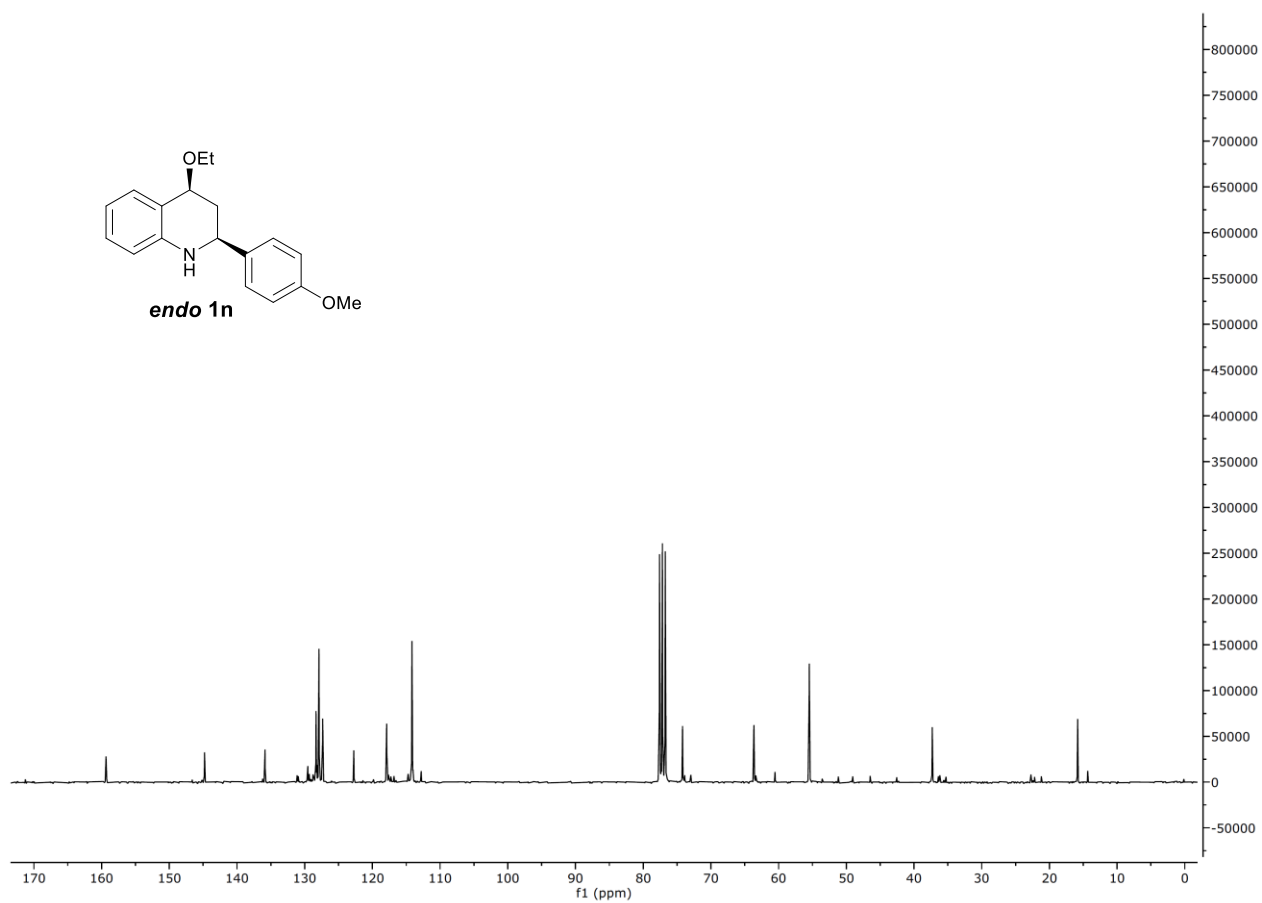

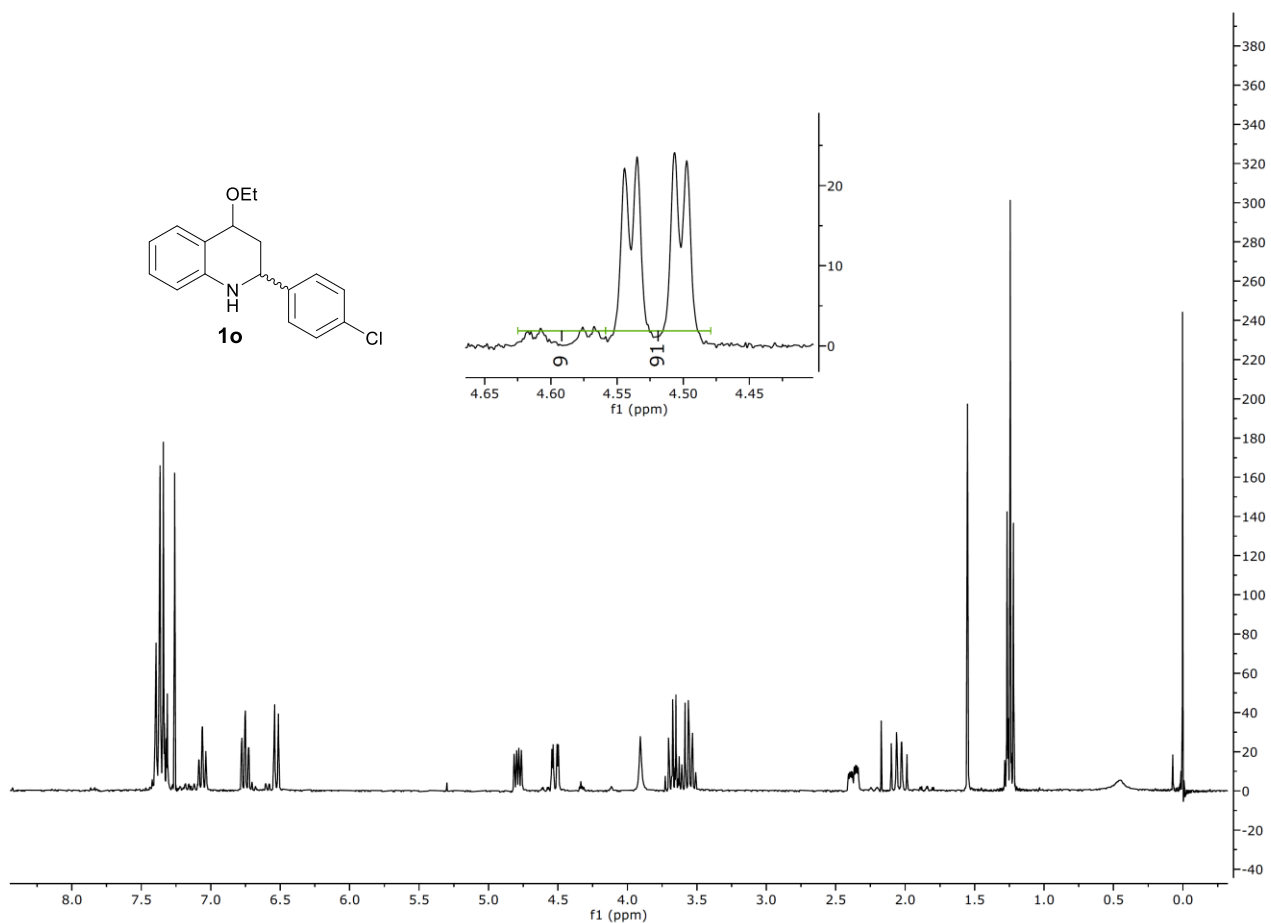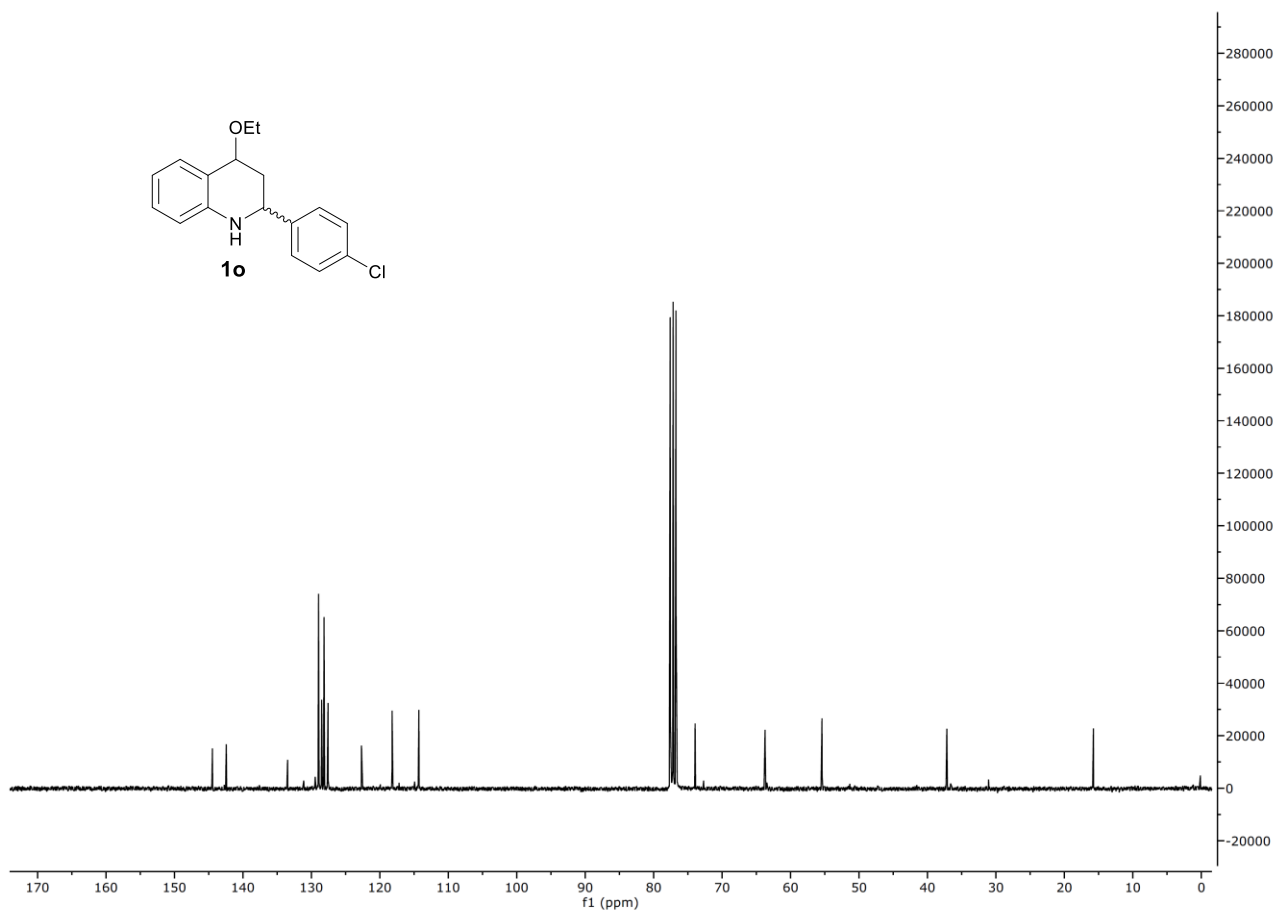

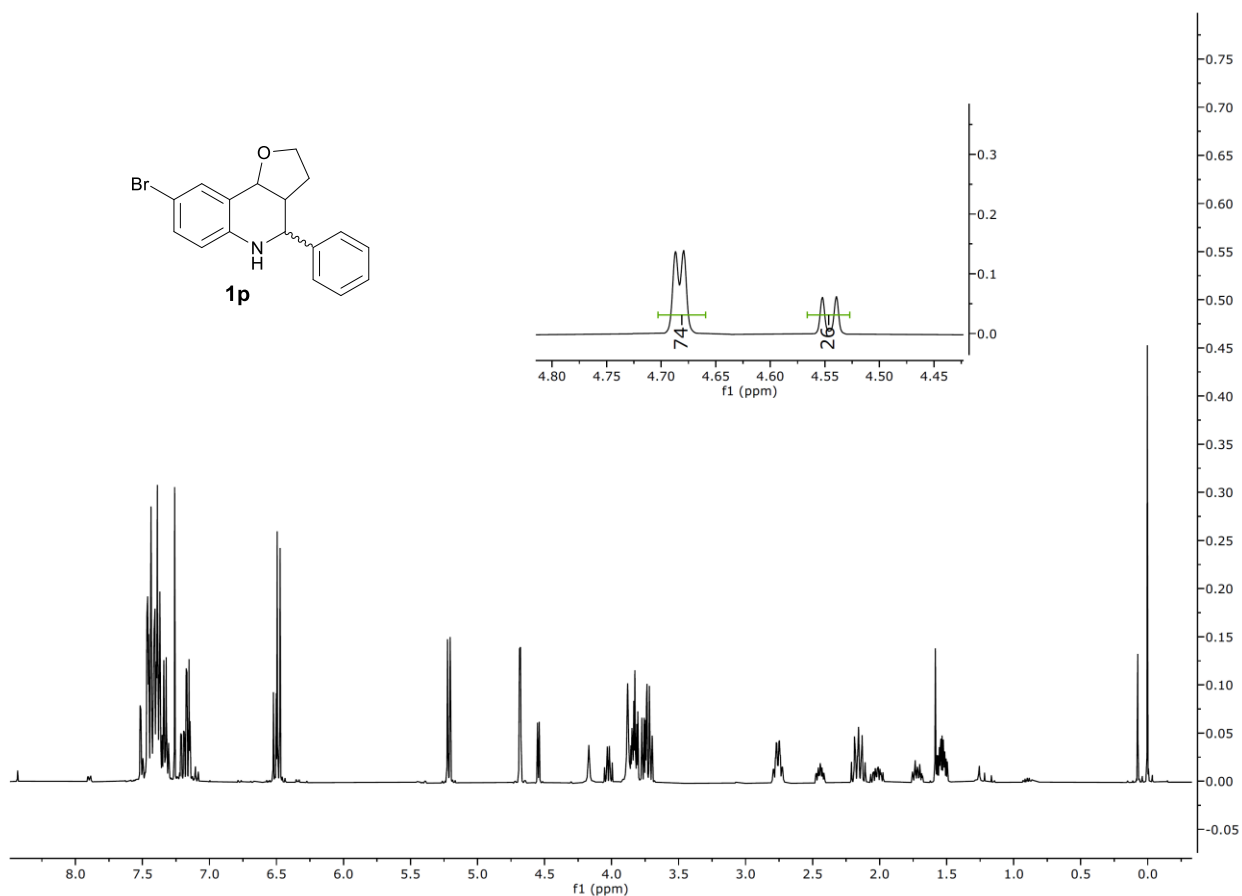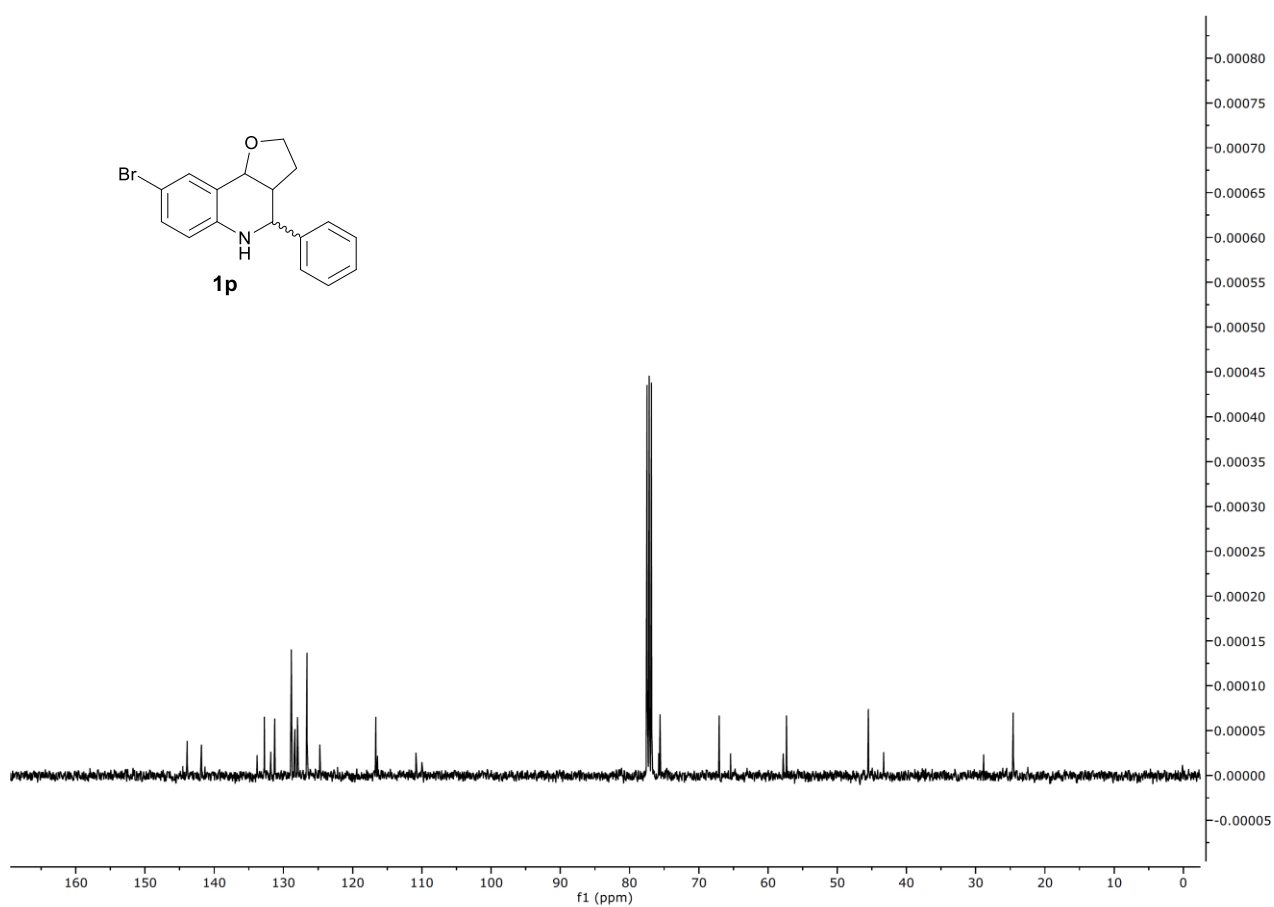



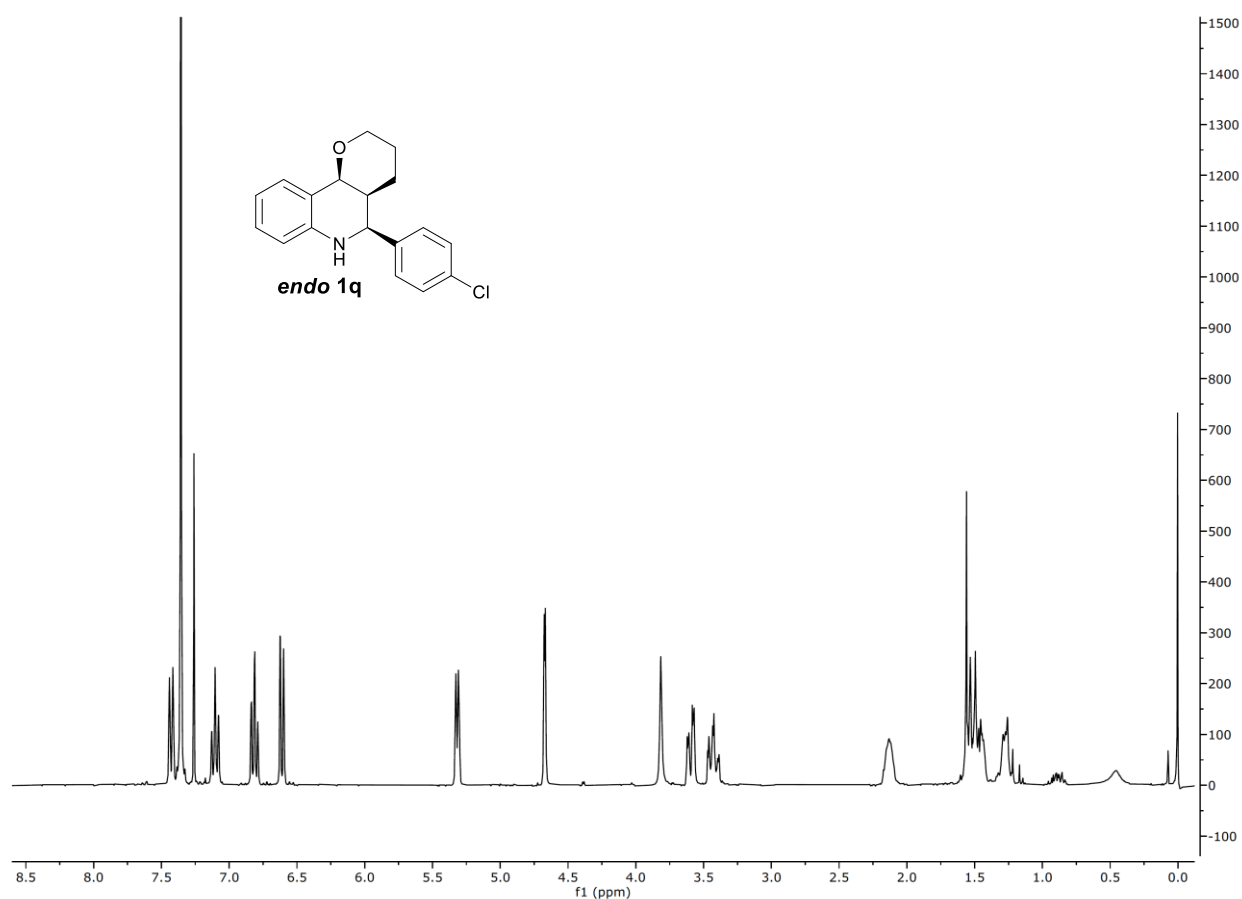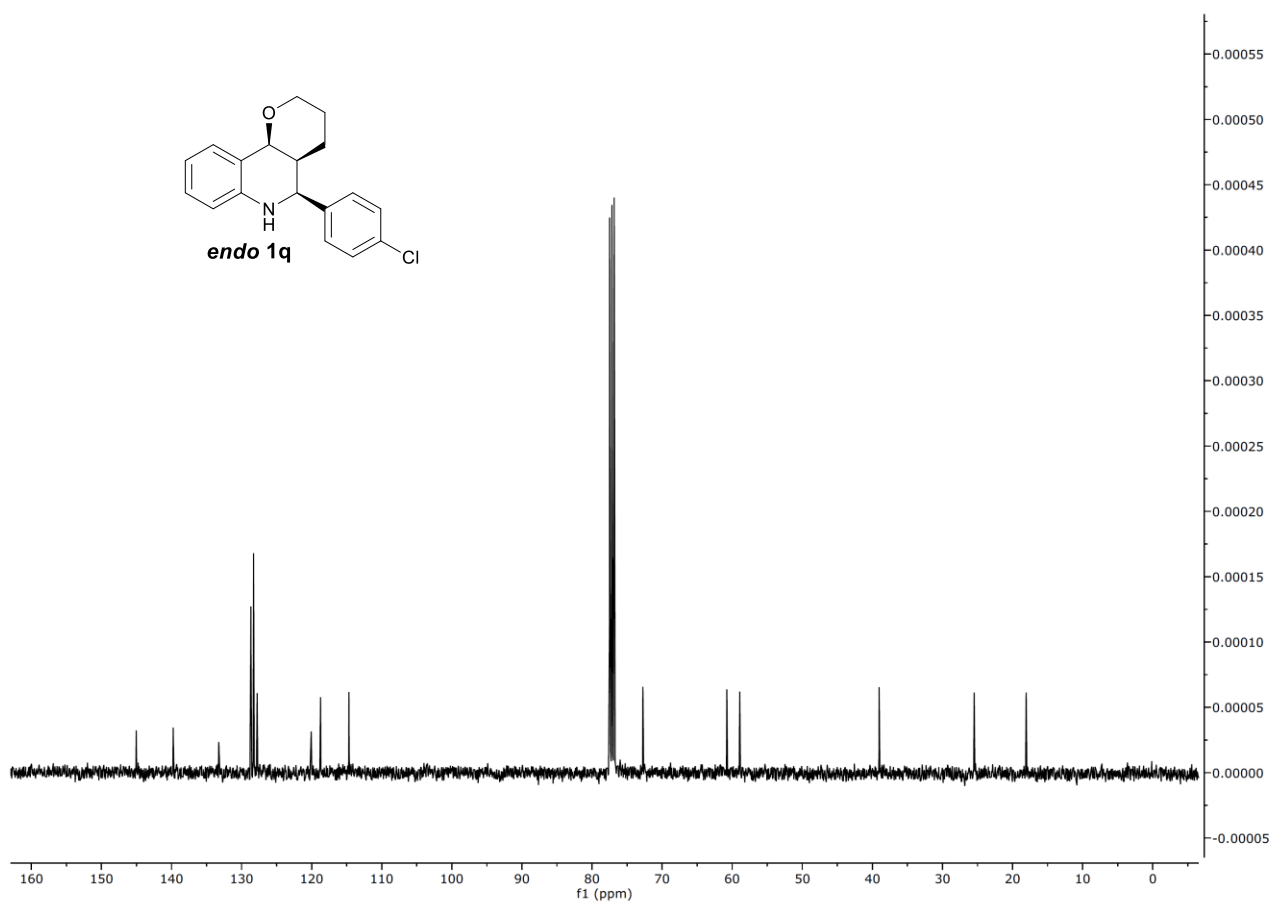

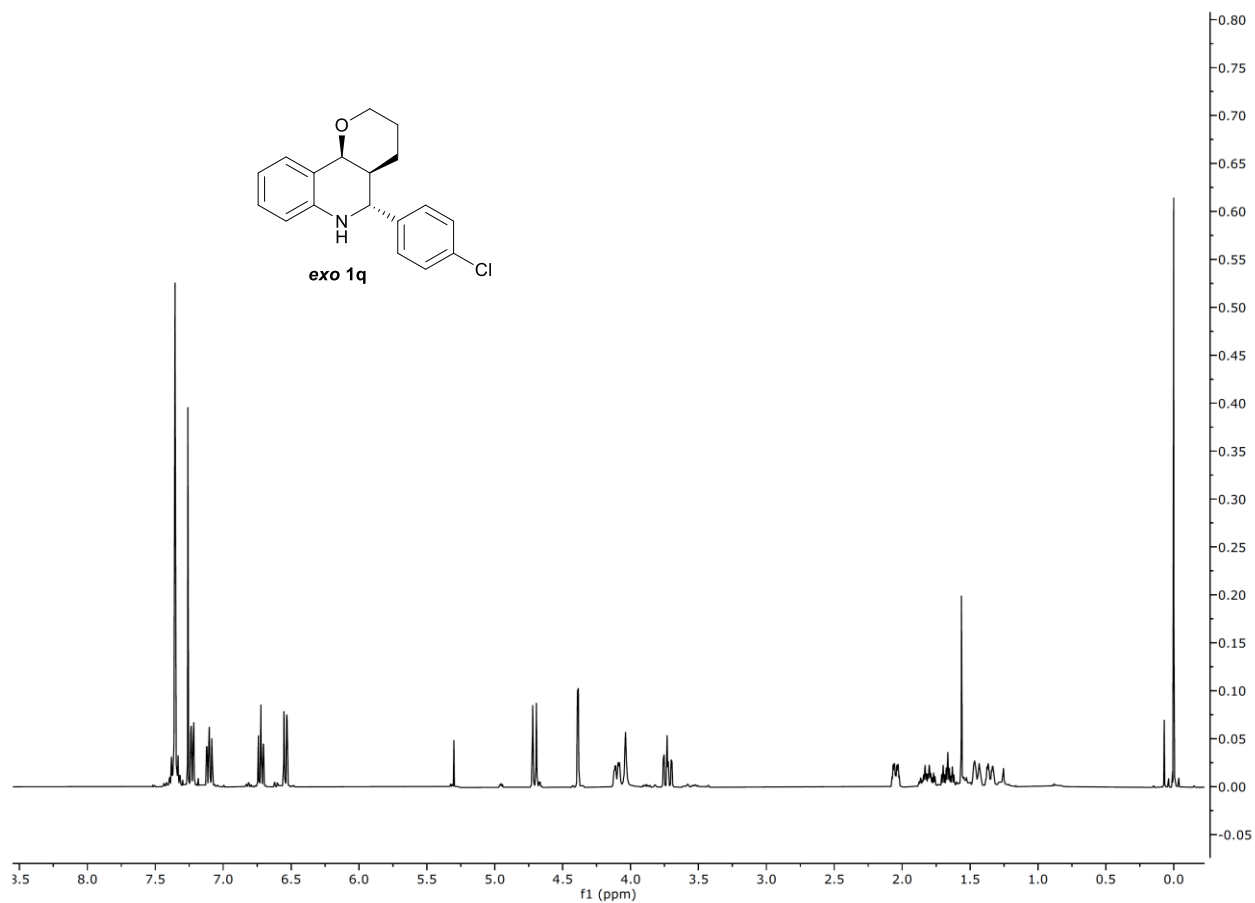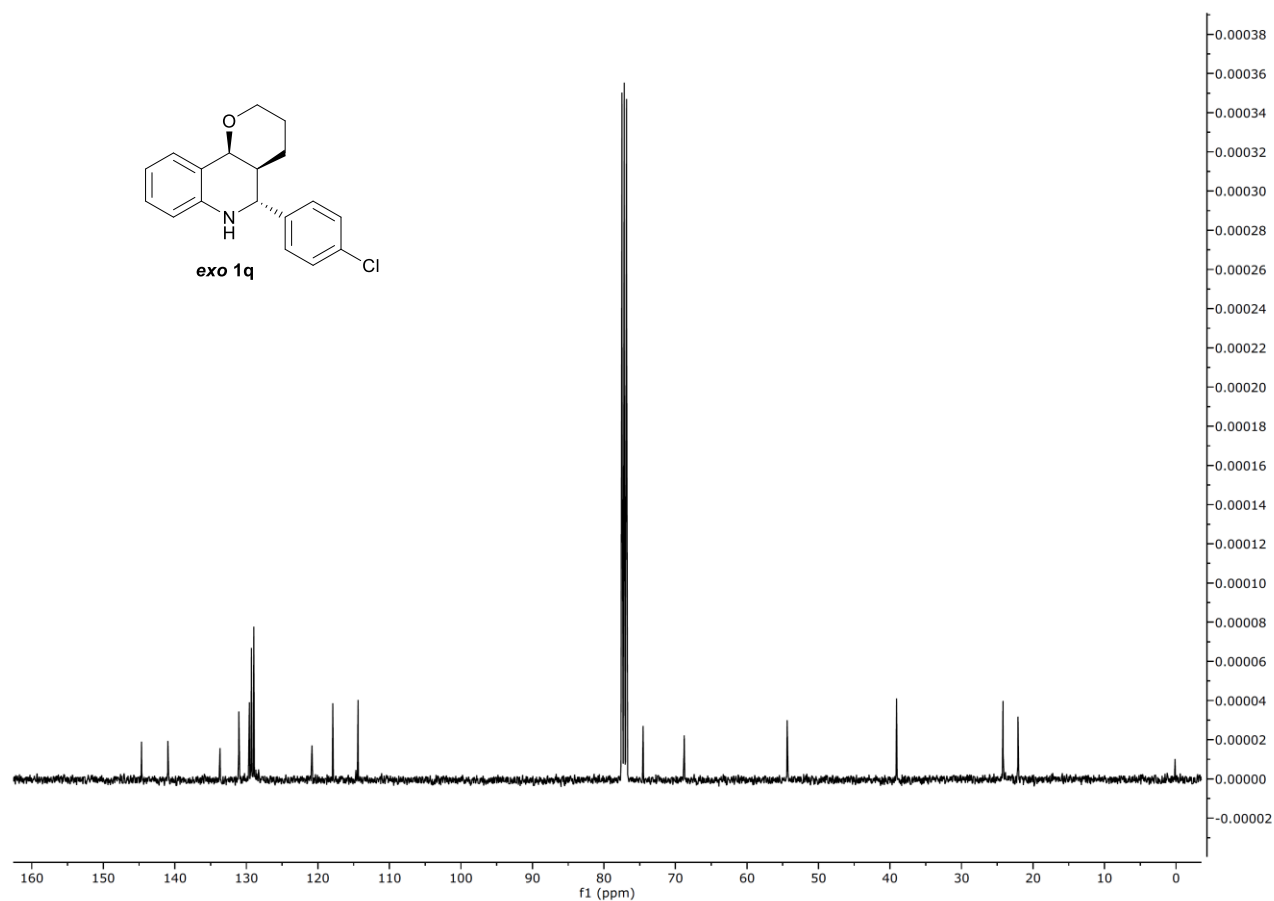

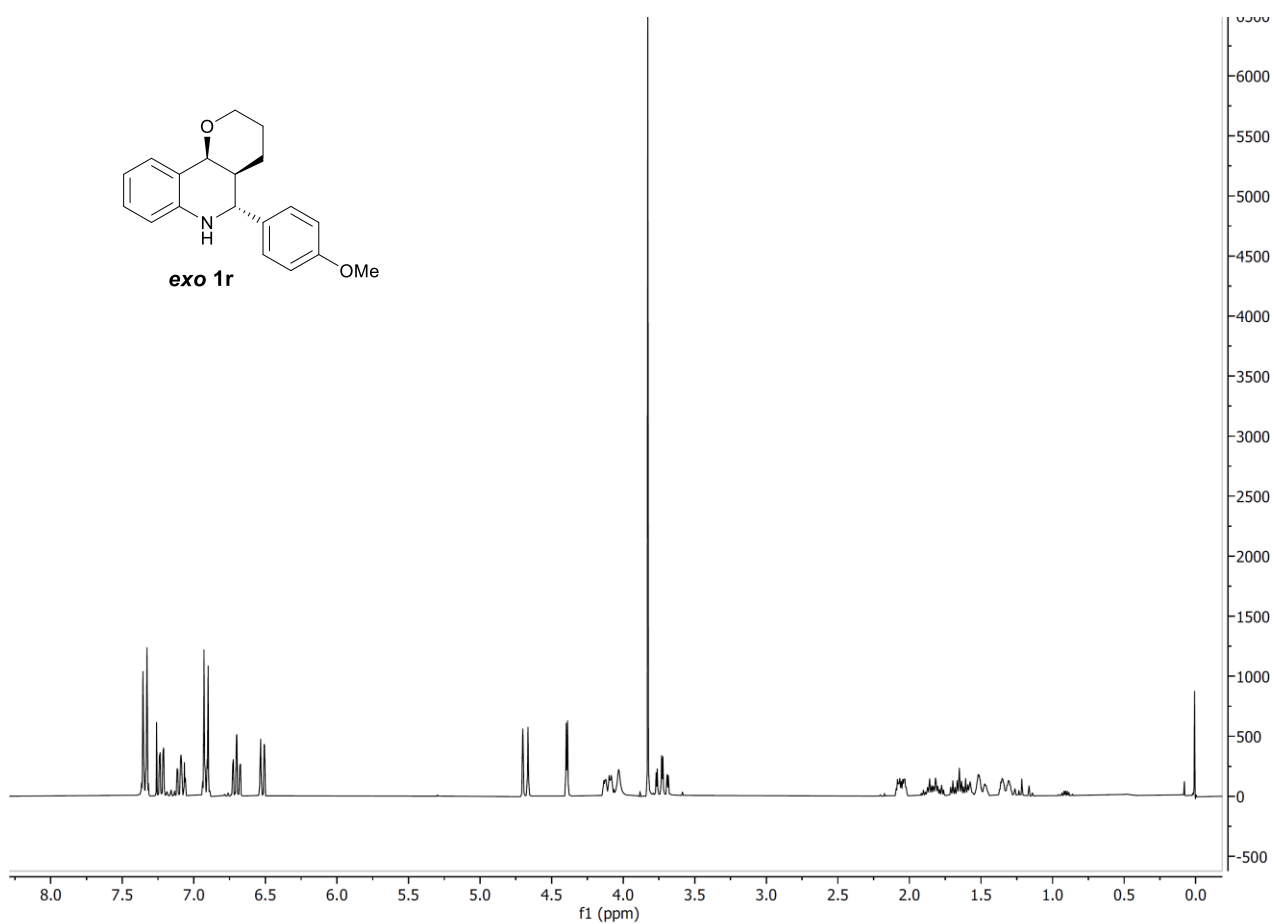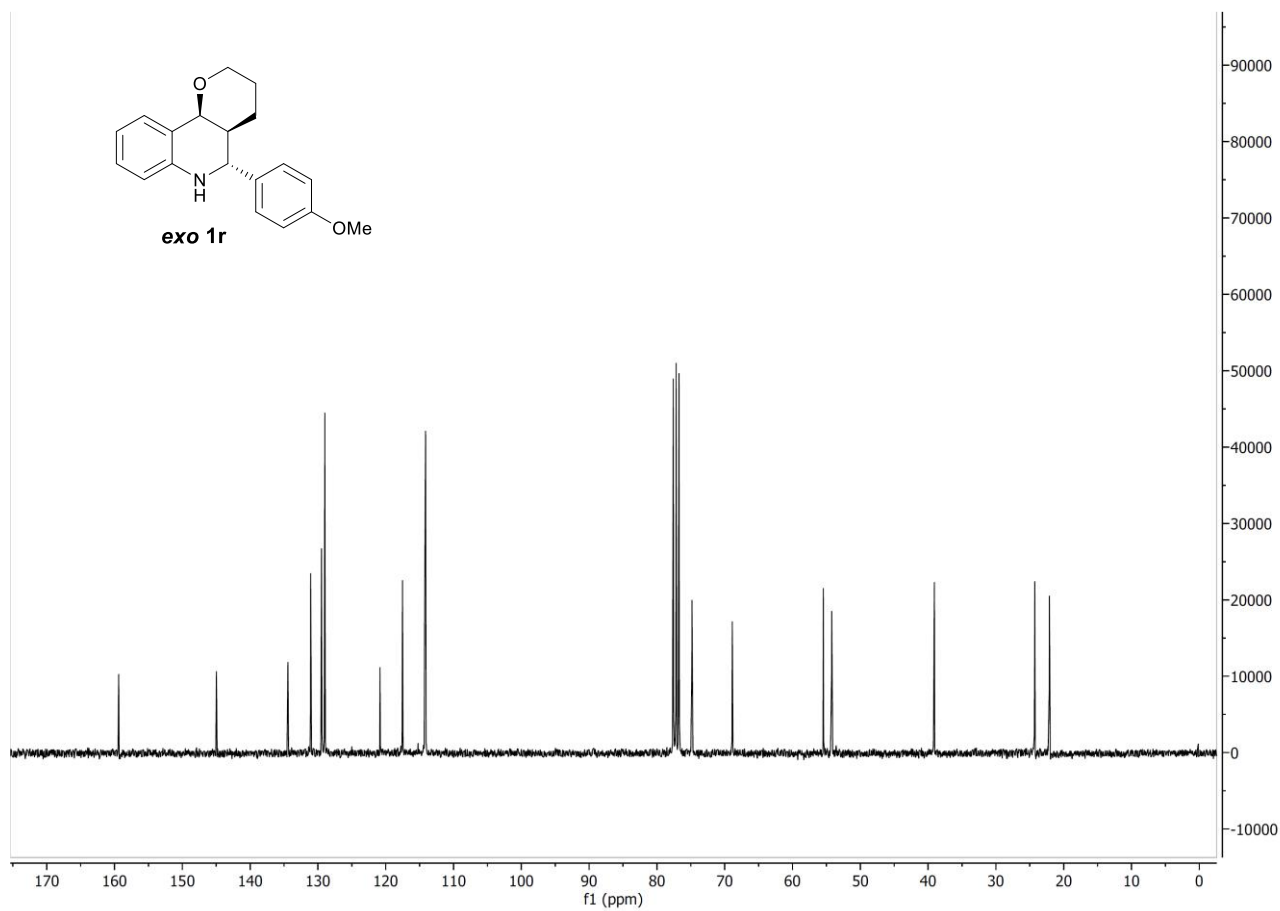

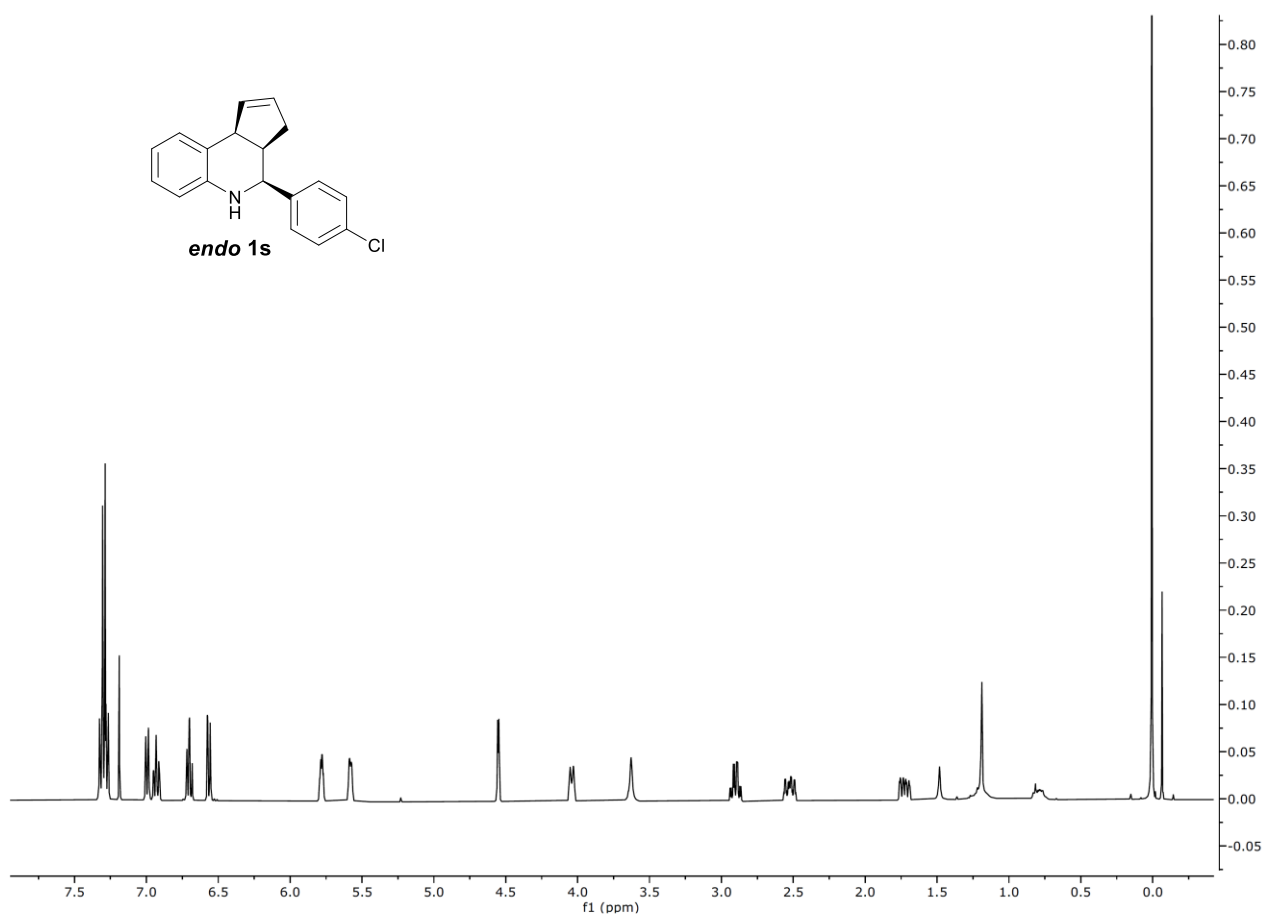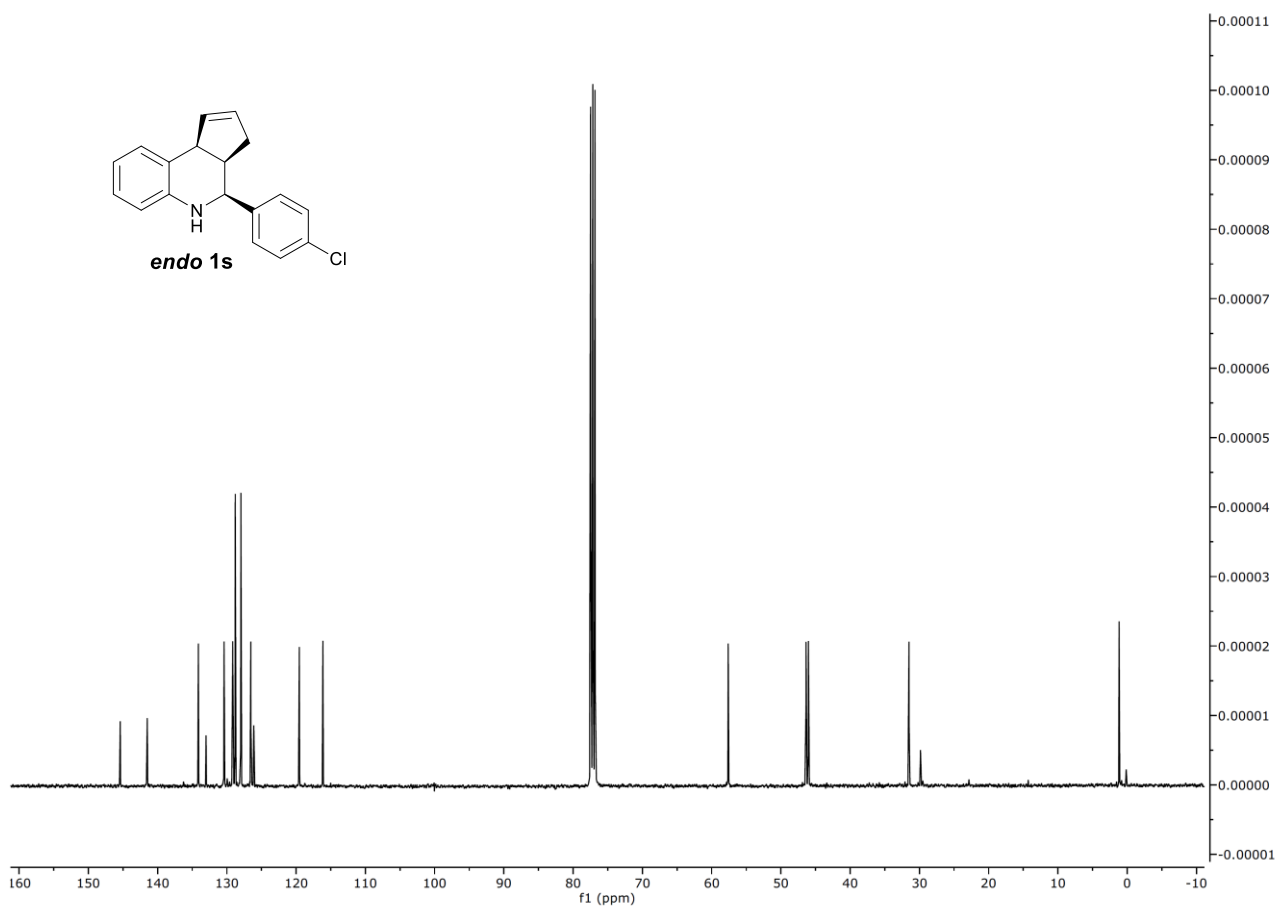

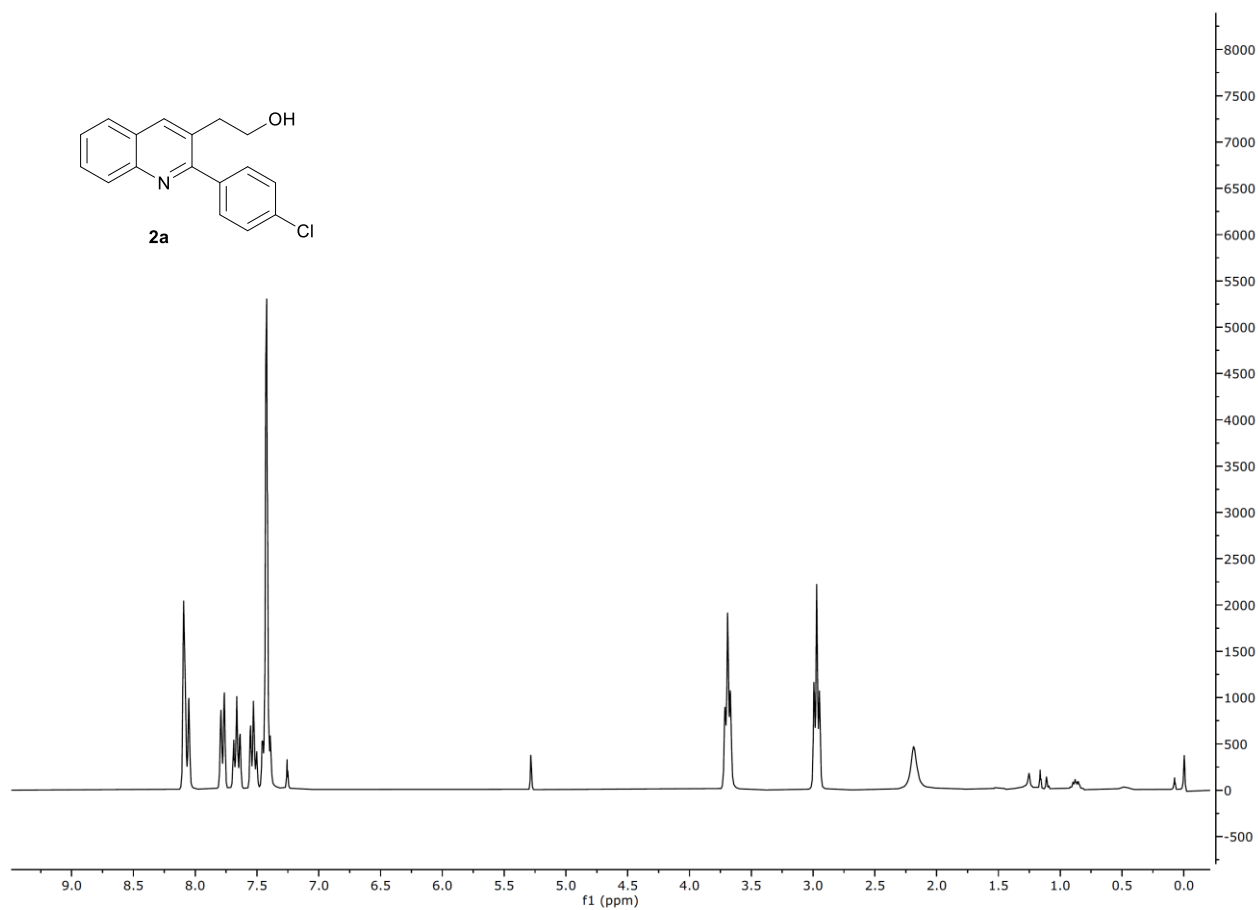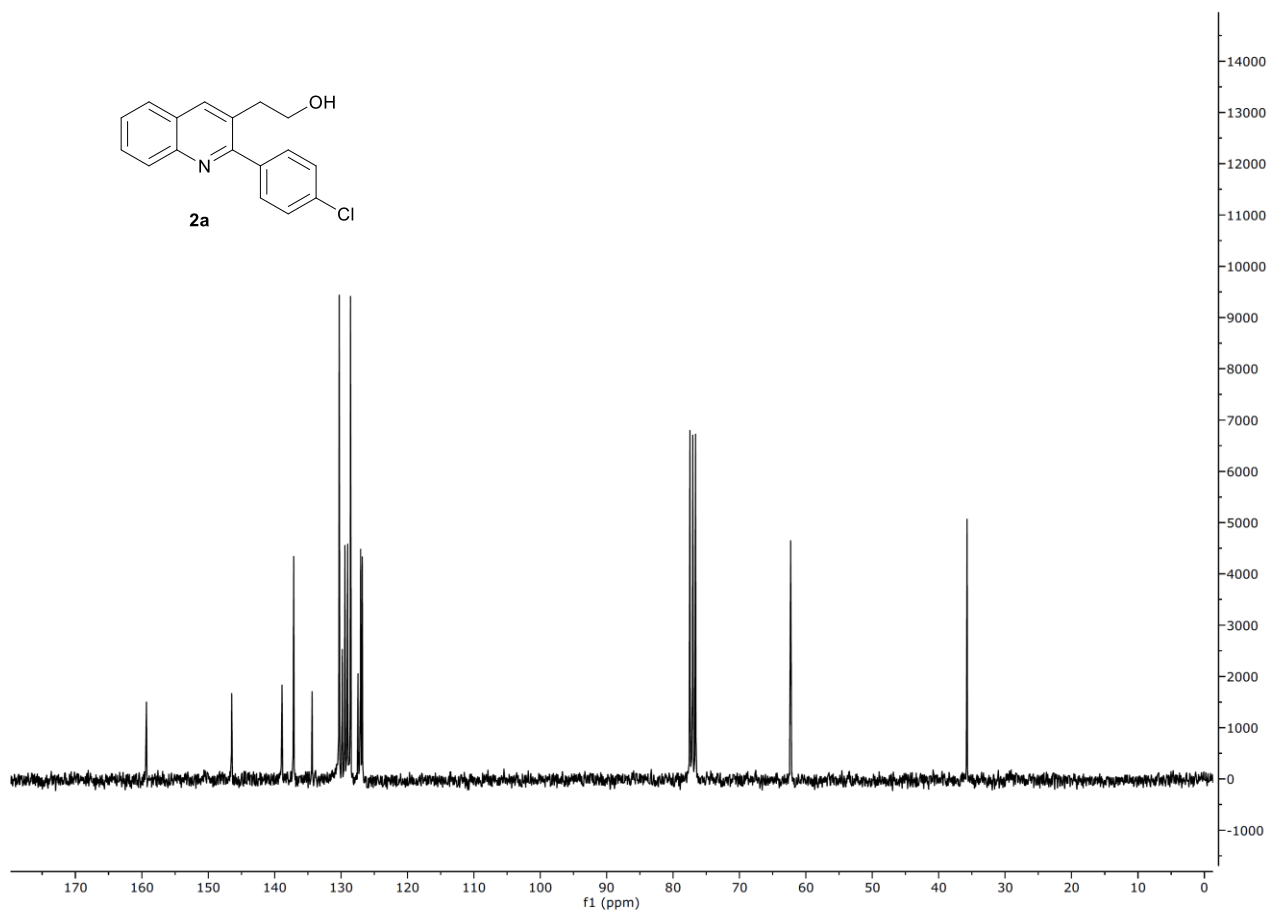

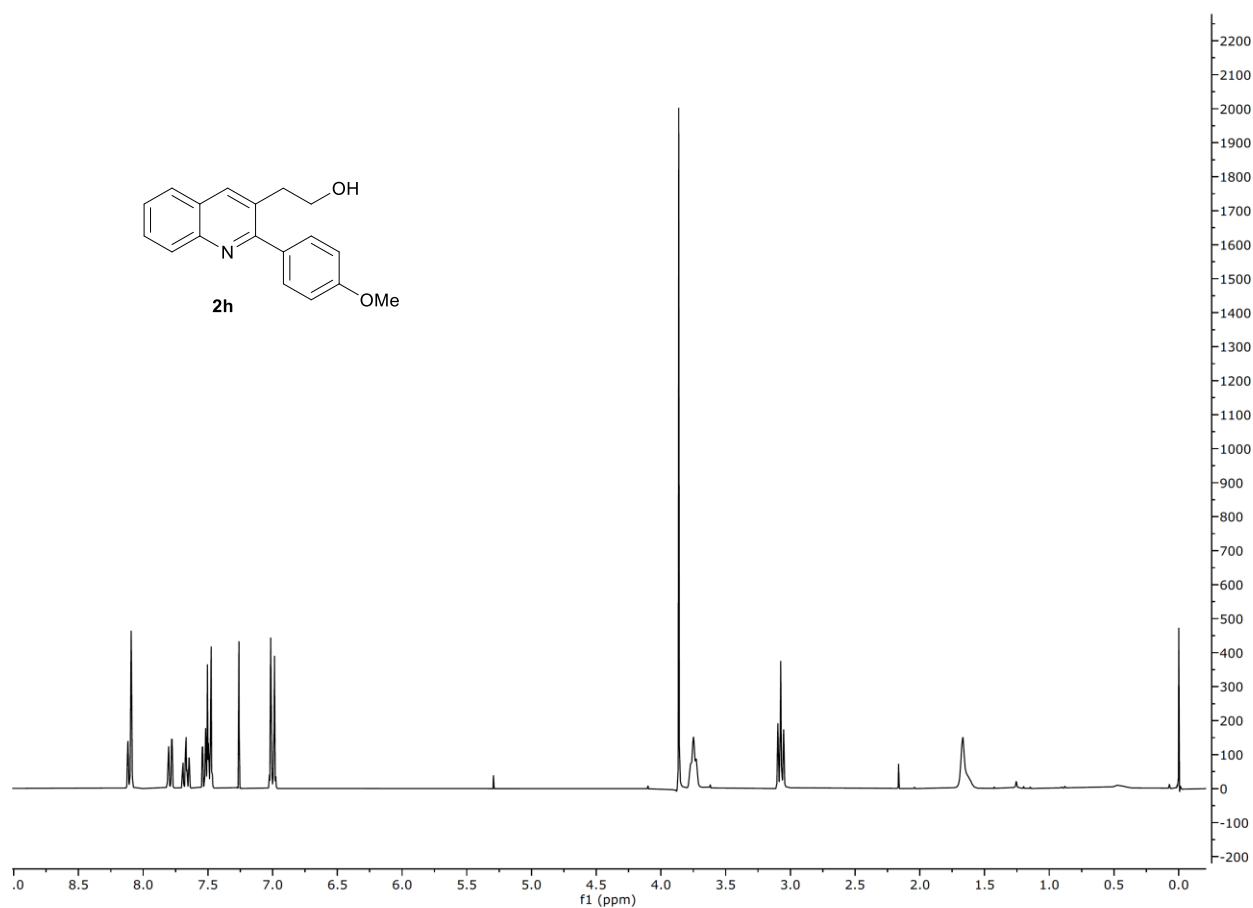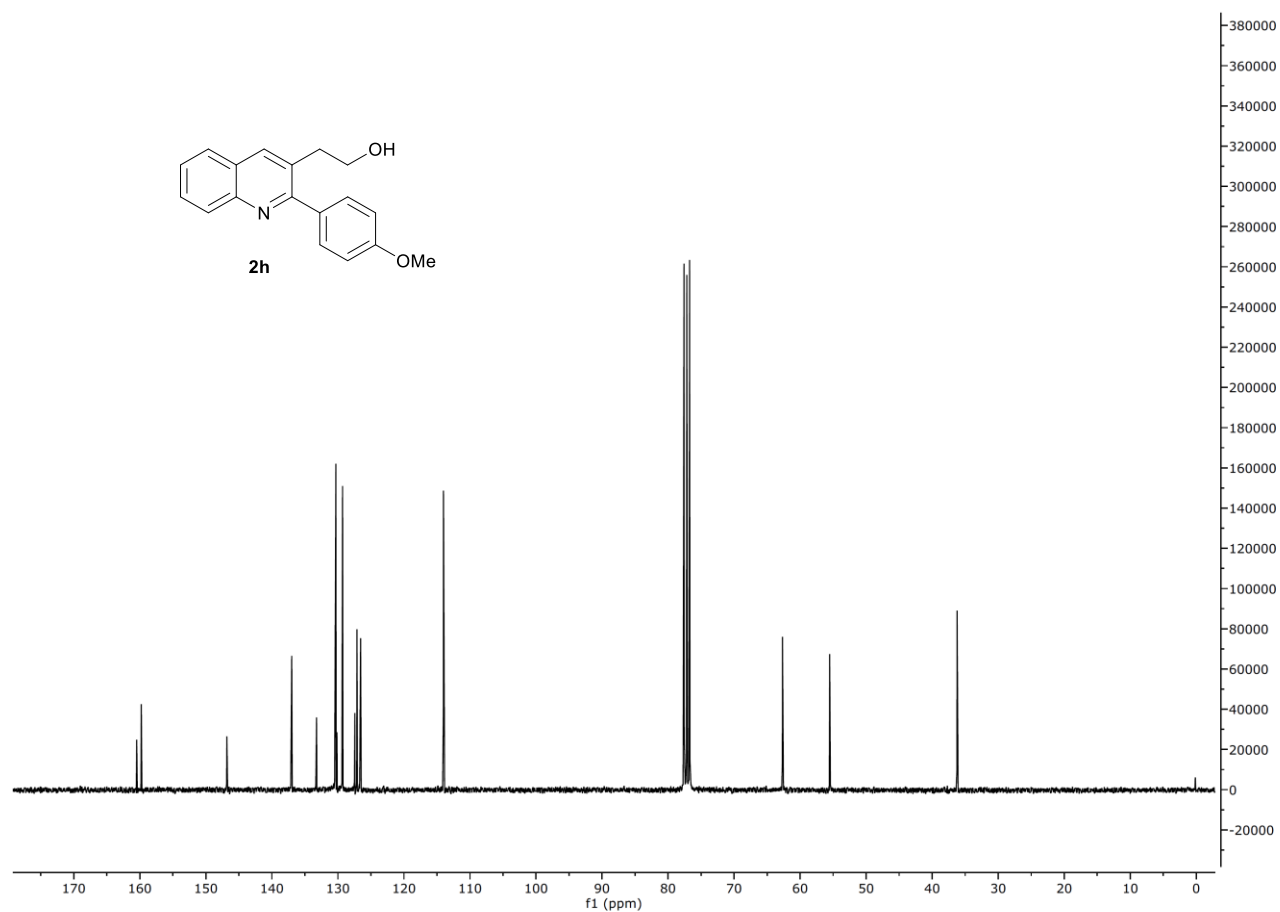

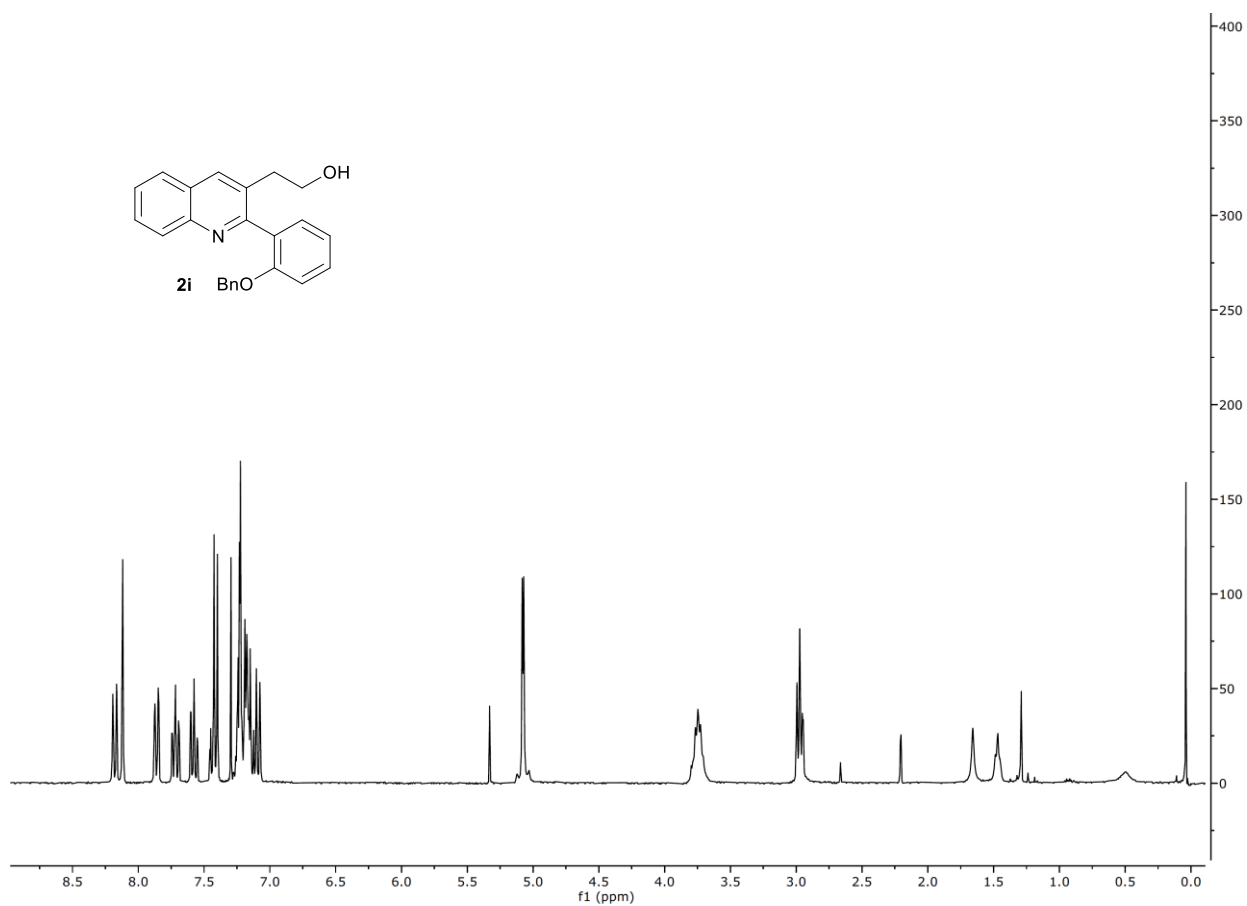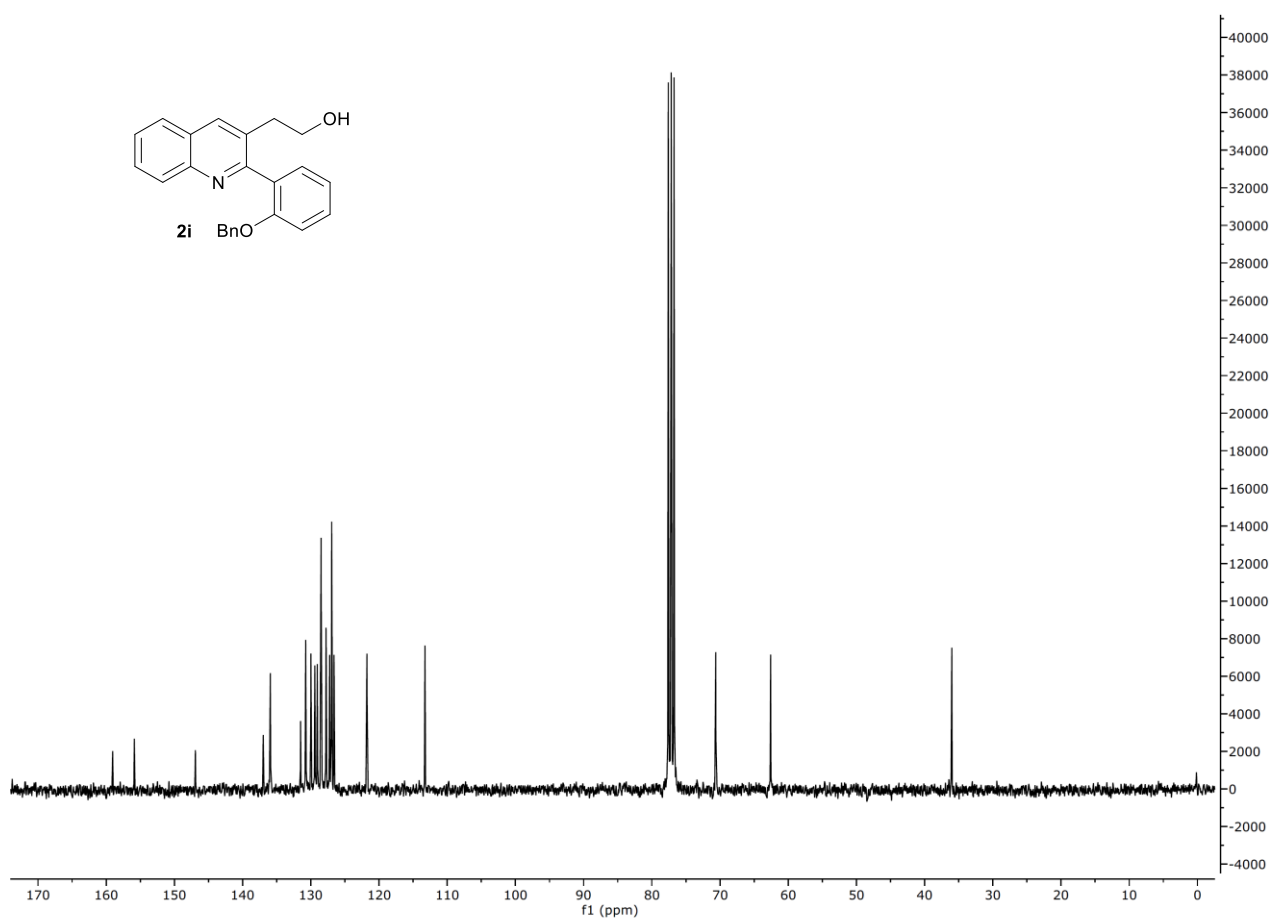

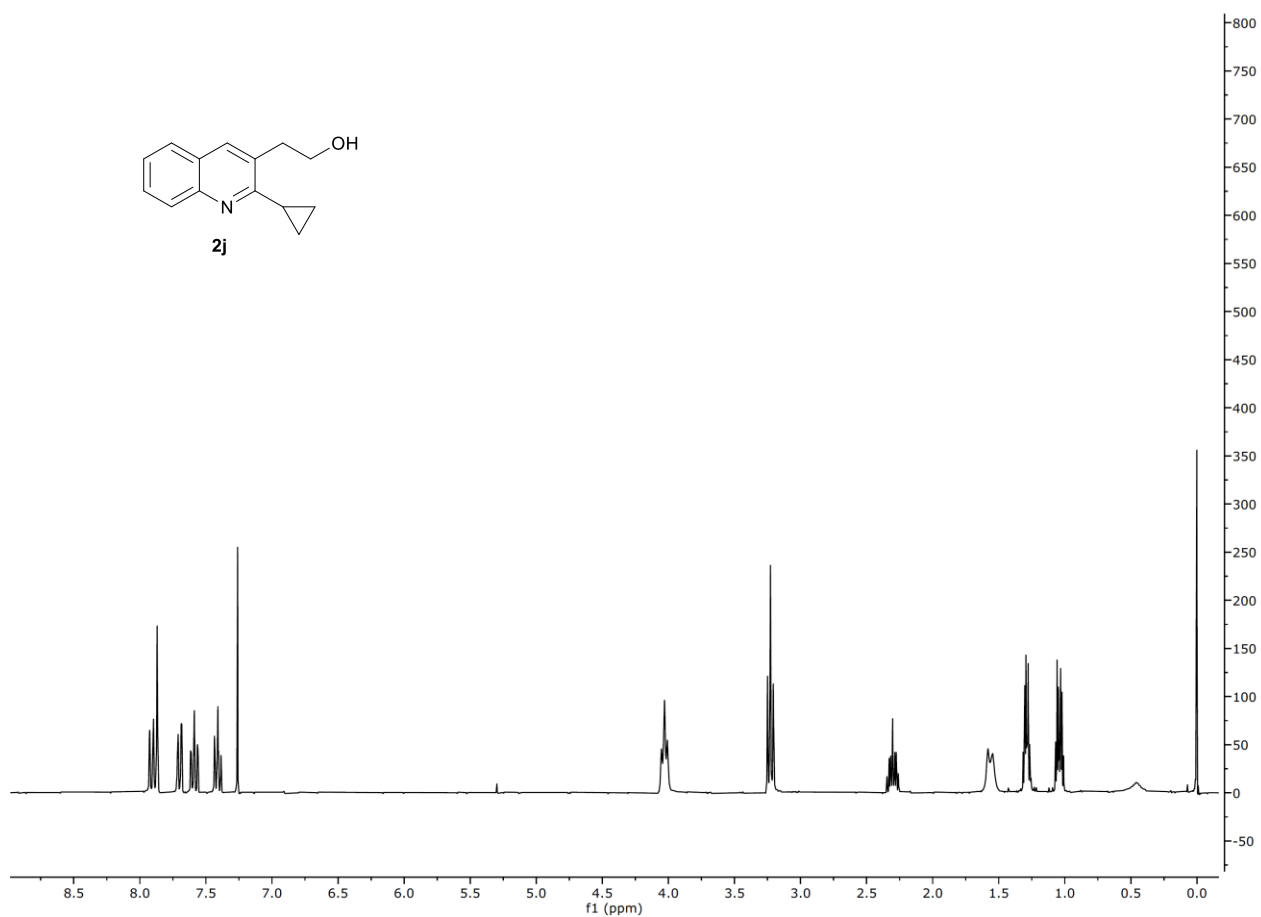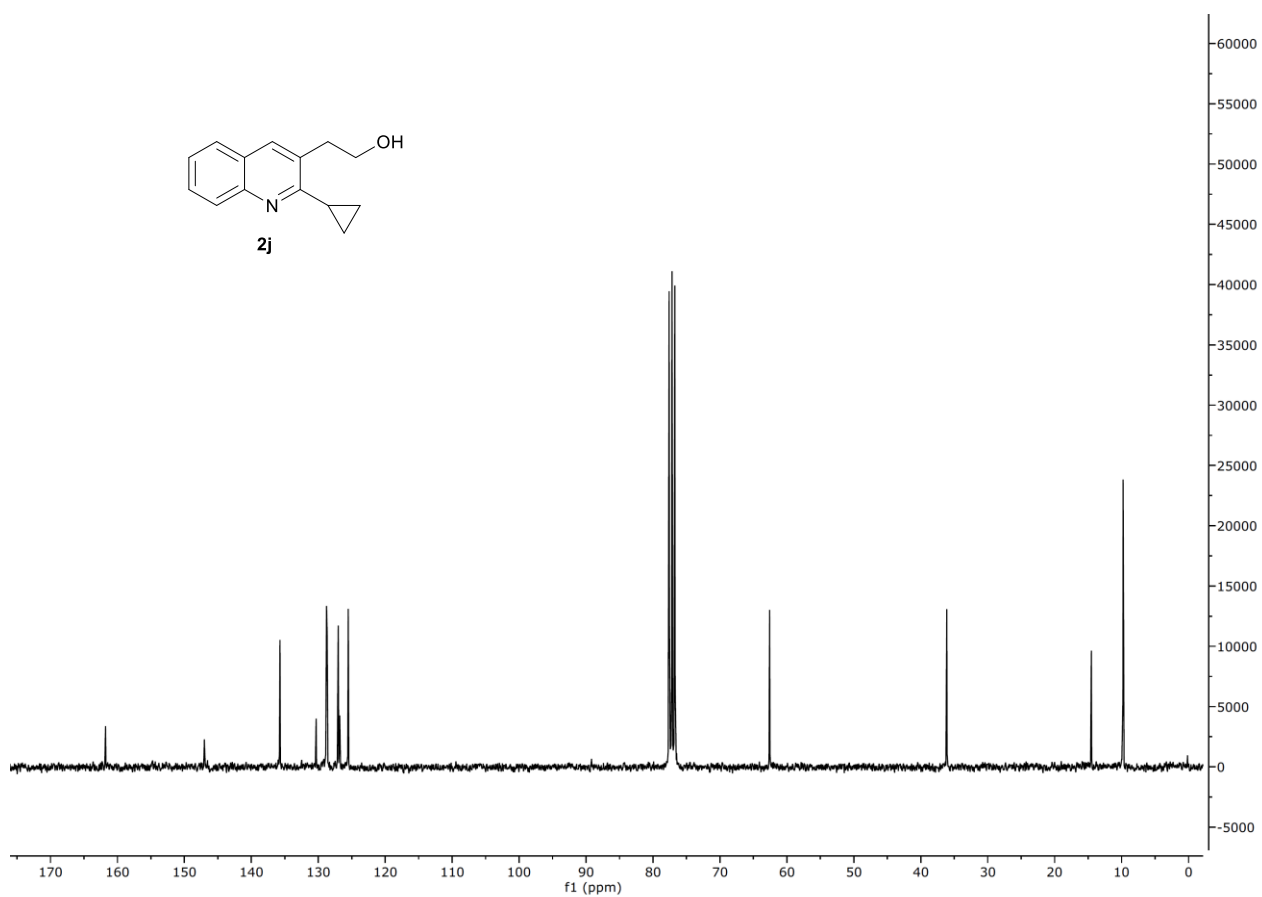



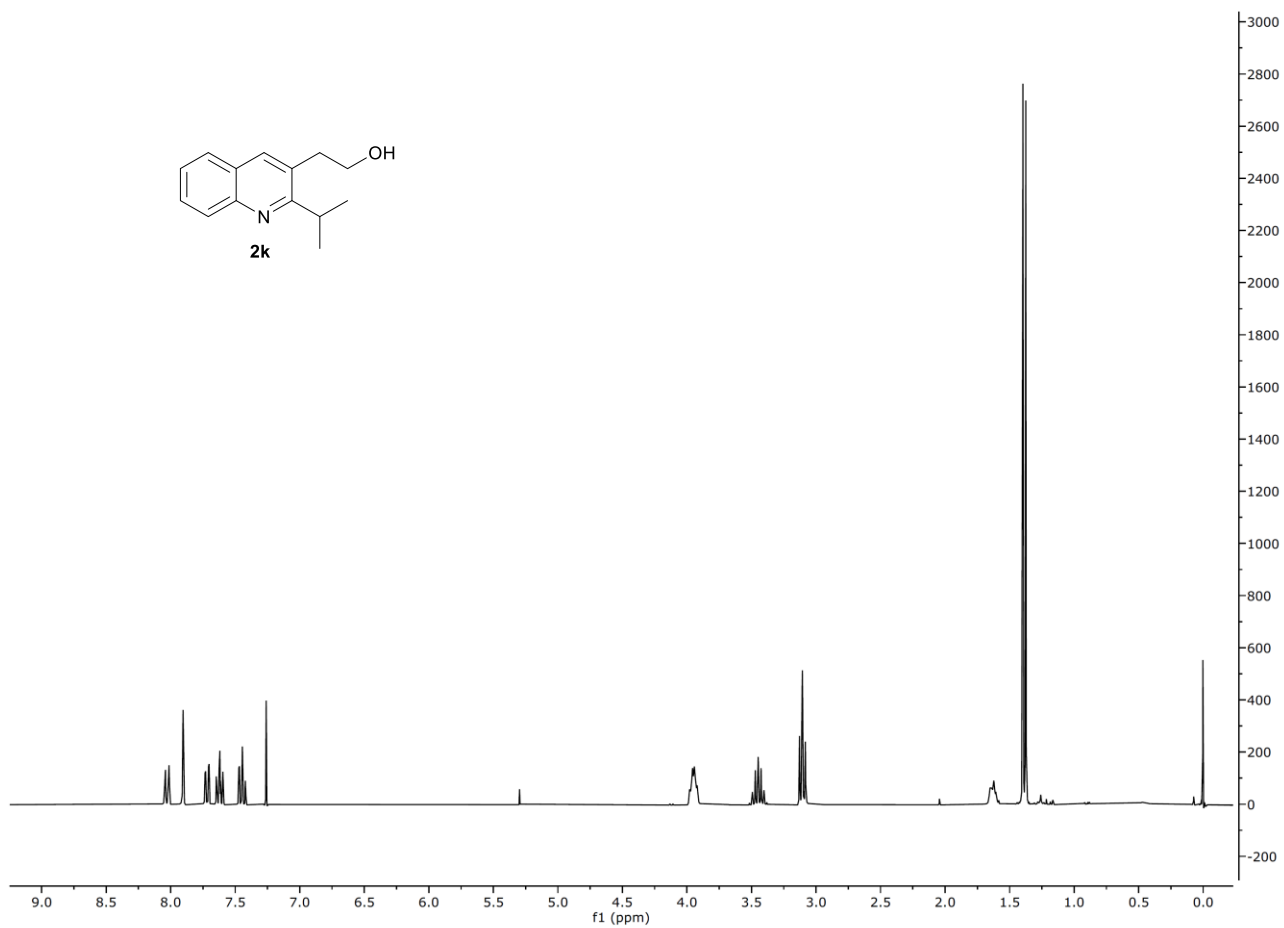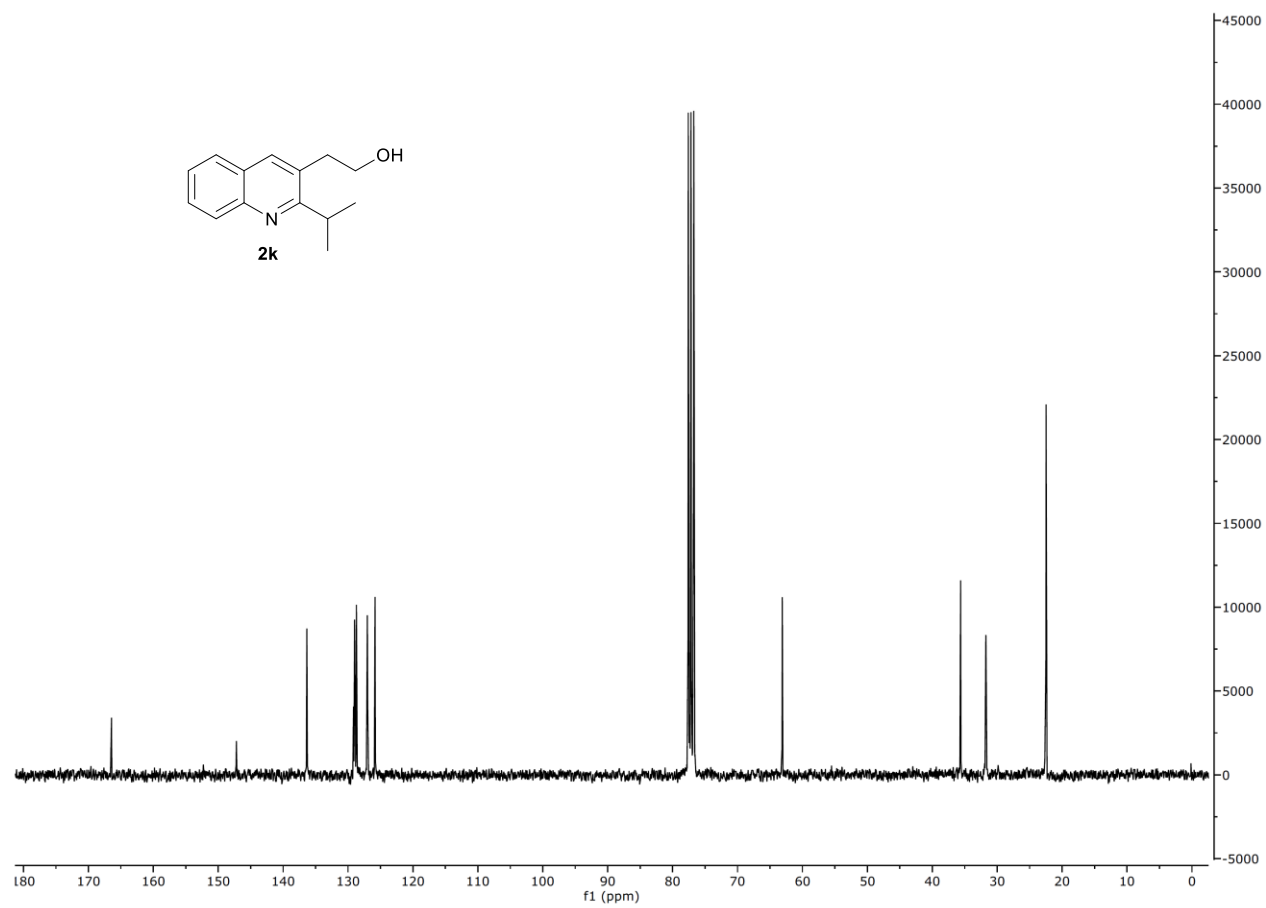

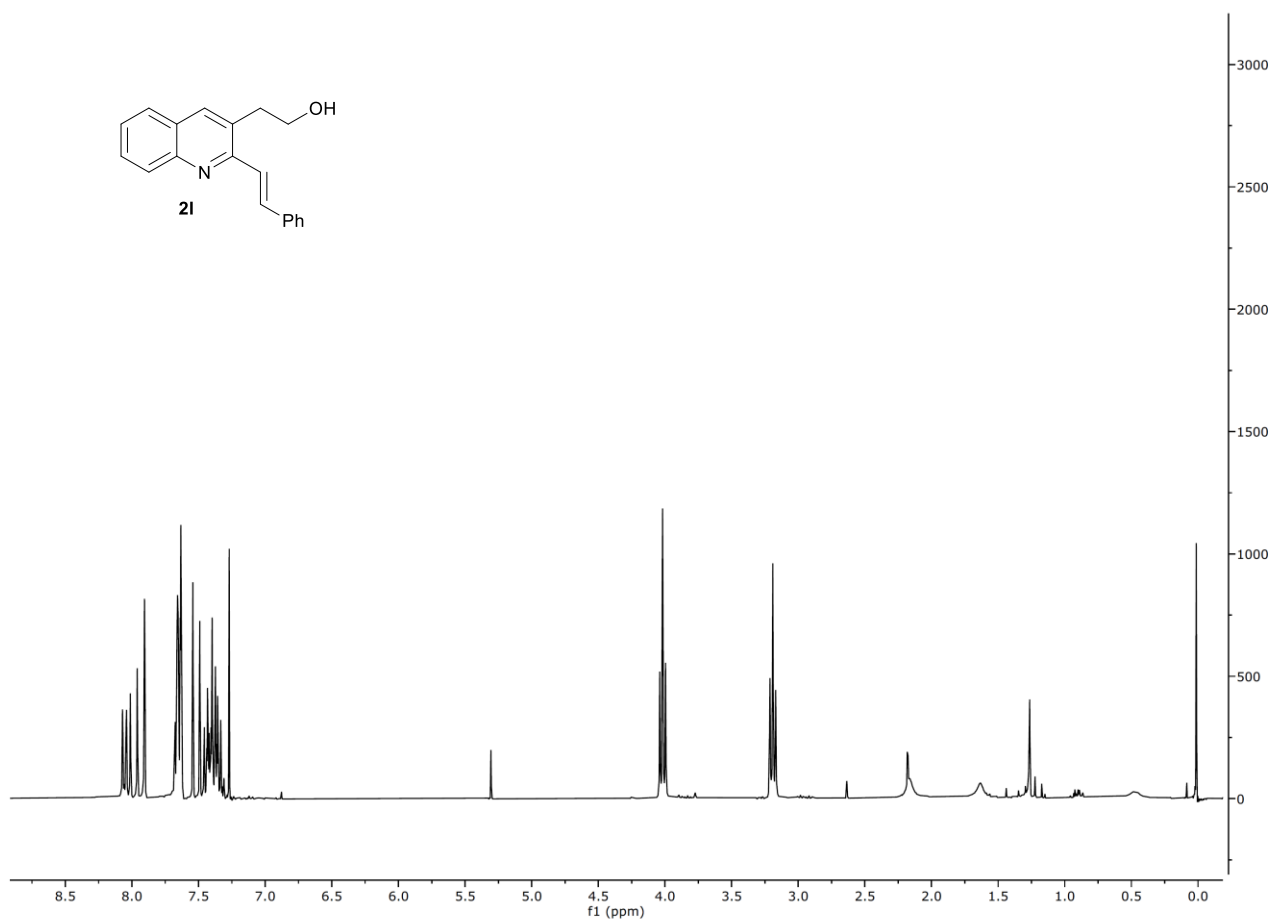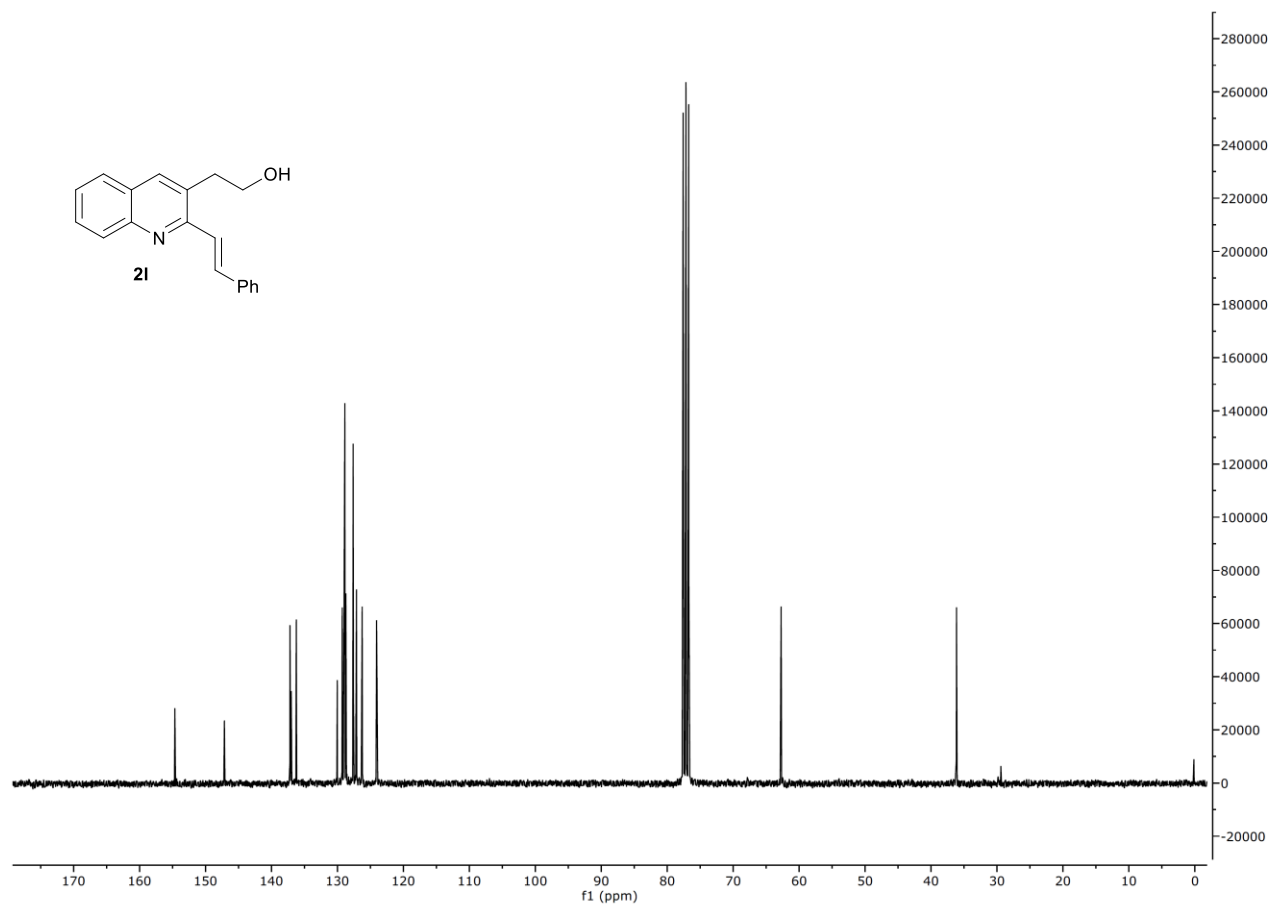

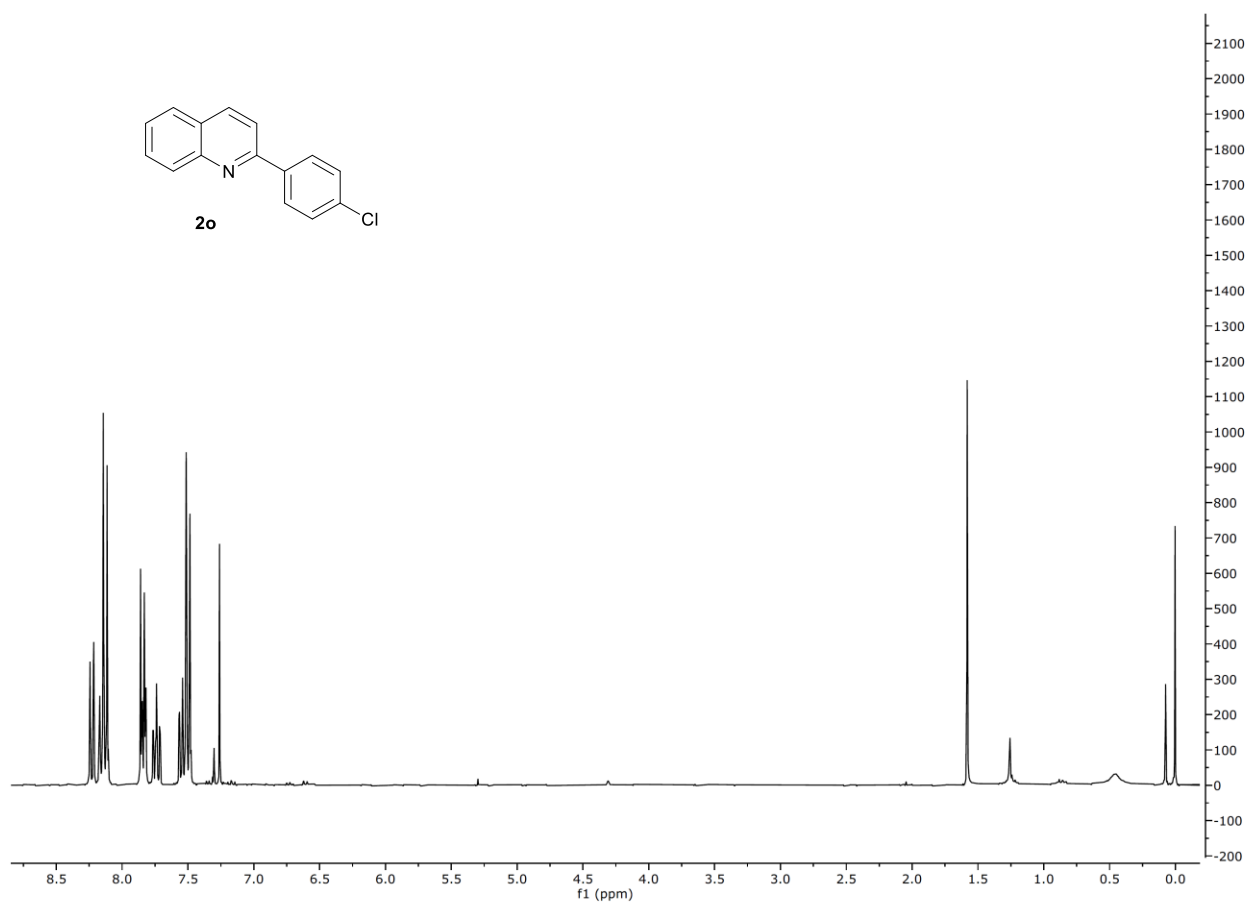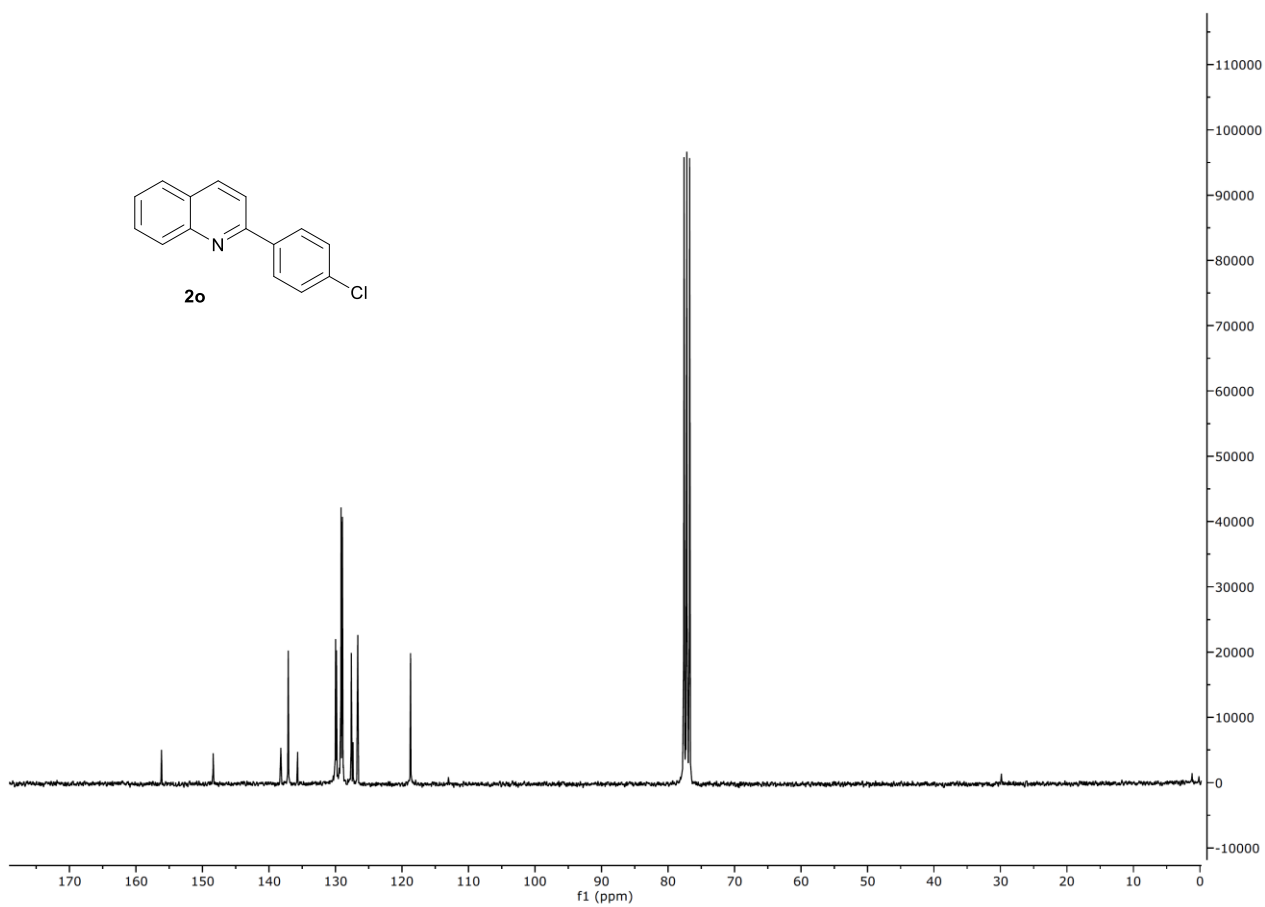

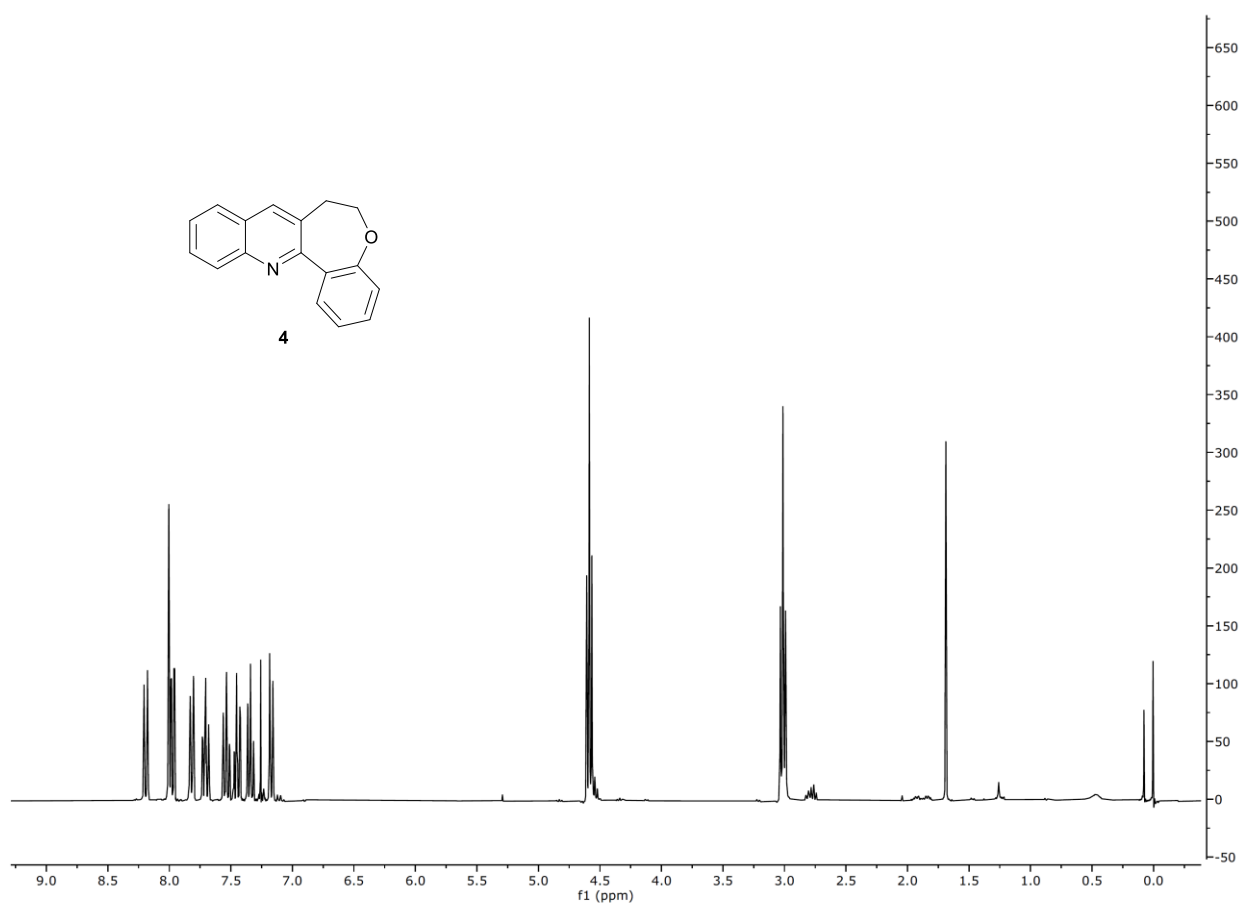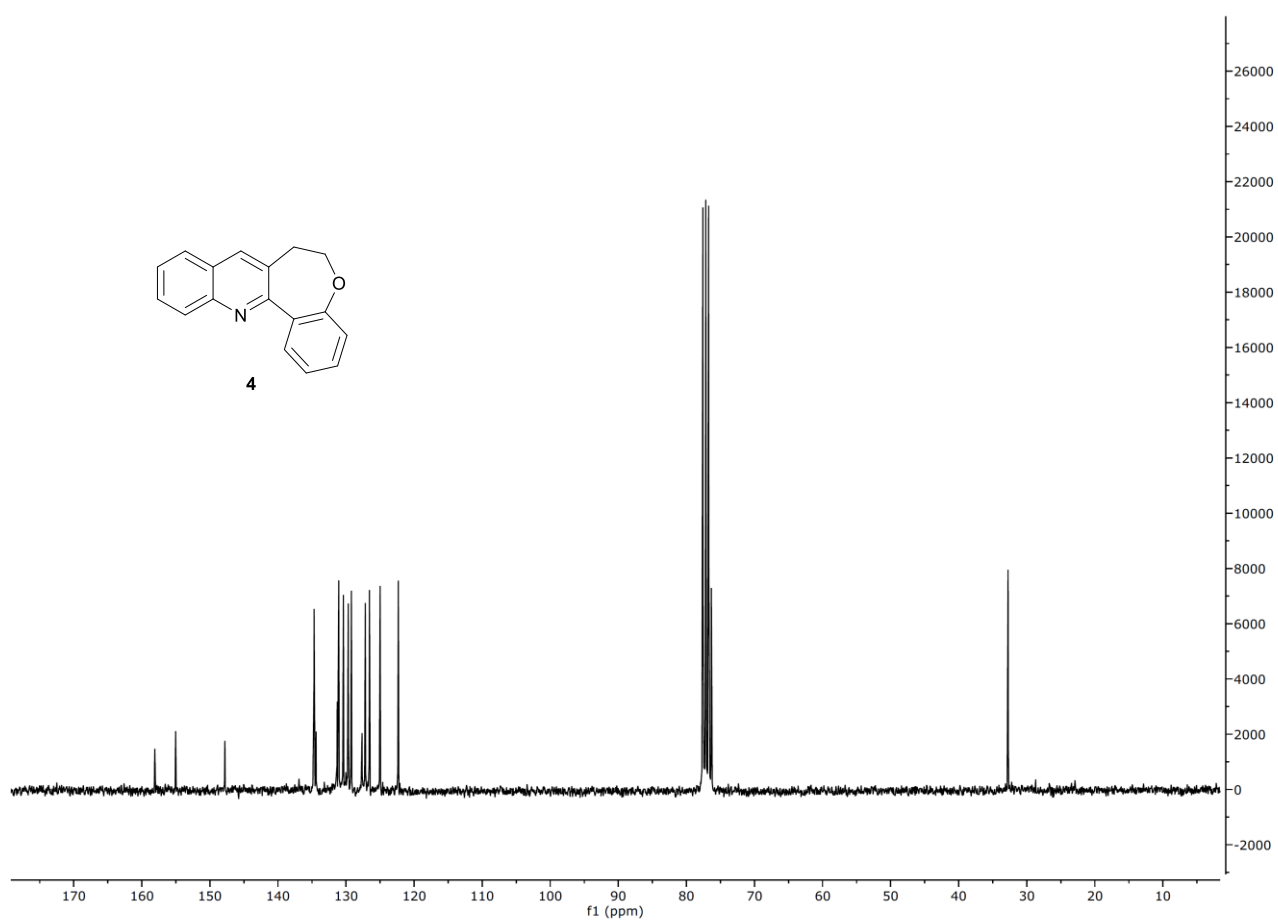

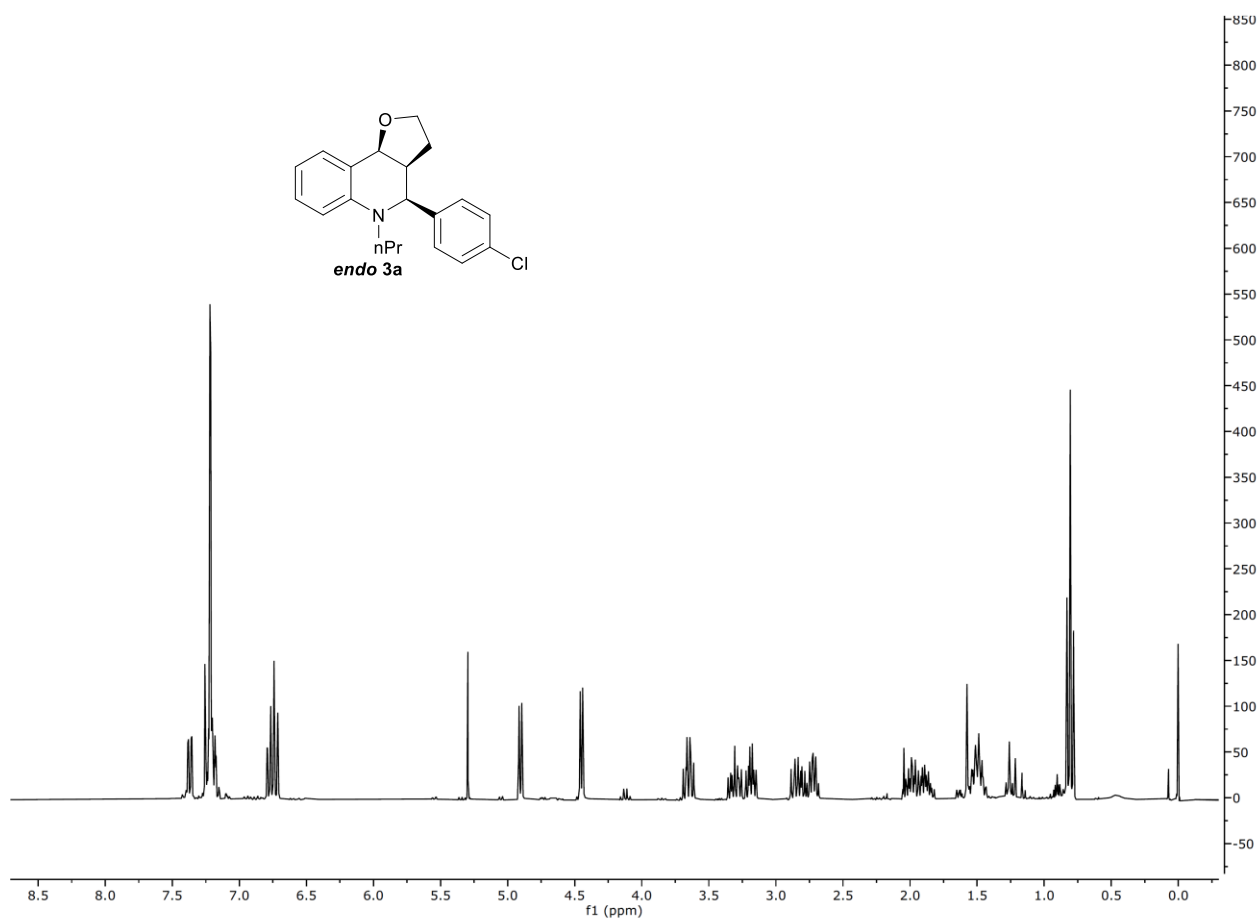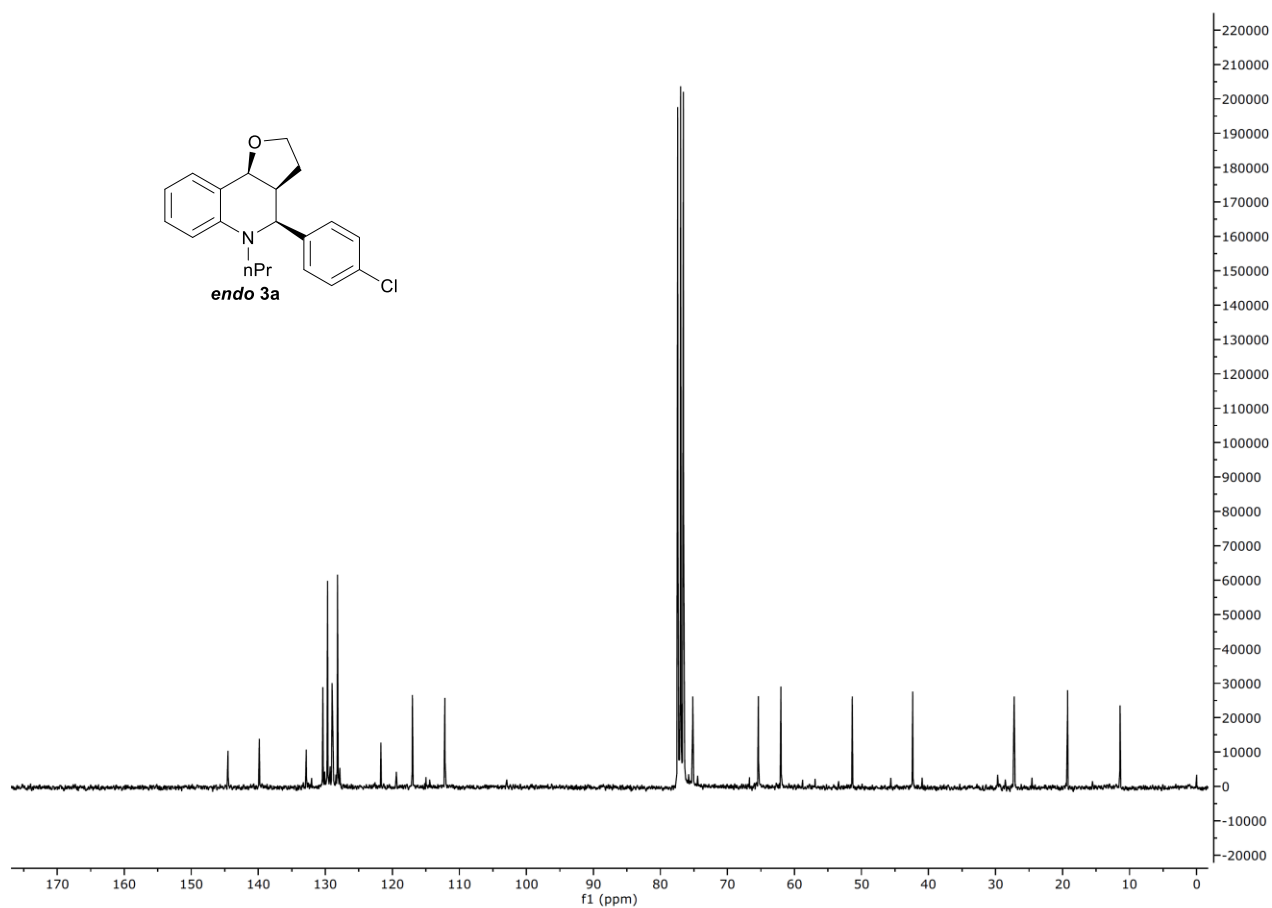

## References

1. B. H. S. T. da Silva, N. L. Marana, A. C. Mafud and L. C. da Silva-Filho, A theoretical and experimental study to unequivocal structural assignment of tetrahydroquinoline derivatives, *Structural Chemistry*, 2013, **25**, 327-337.
2. H. G. Imrich, J. Conrad, D. Bubrin and U. Beifuss, From nitrobenzenes to substituted tetrahydroquinolines in a single step by a domino reduction/imine formation/aza-diels-alder reaction, *J Org Chem*, 2015, **80**, 2319-2332.
3. J. Salehi, H. Veisi, M. M. Khodaei and A. R. Khosropour, One-pot synthesis of pyrano- and furanoquinolines catalyzed by molten tetra-n-butylphosphonium bromide under solvent-free conditions, *Journal of Heterocyclic Chemistry*, 2011, **48**, 484-488.
4. J. S. Yadav, B. V. S. Reddy, V. Sunitha and K. S. Reddy, Novel Use of Selectfluor<sup>TM</sup> for the Synthesis of cis-Fused Pyrano- and Furanotetrahydroquinolines, *Advanced Synthesis & Catalysis*, 2003, **345**, 1203-1206.
5. B. Das, H. Holla, R. Ramu and K. Venkateswarlu, Synthesis of pyrano and furanoquinolines using silica chloride or amberlyst-15 as a heterogeneous catalyst, *Journal of Chemical Research*, 2005, **2005**, 793-795.
6. L.-P. Li, X. Cai, Y. Xiang, Y. Zhang, J. Song, D.-C. Yang, Z. Guan and Y.-H. He, The  $\alpha$ -chymotrypsin-catalyzed Povarov reaction: one-pot synthesis of tetrahydroquinoline derivatives, *Green Chemistry*, 2015, **17**, 3148-3156.
7. C. Cimorelli, S. Bordini, P. Piermattei, M. Pellei, F. Del Bello and E. Marcantoni, An Efficient Lewis Acid Catalyzed Povarov Reaction for the One-Pot Stereocontrolled Synthesis of Polyfunctionalized Tetrahydroquinolines, *Synthesis*, 2017, **49**, 5387-5395.
8. X. Liu and P. H. Toy, Halogen Bond-Catalyzed Povarov Reactions, *Advanced Synthesis & Catalysis*, 2020, **362**, 3437-3441.
9. A. Olmos, J. Sommer and P. Pale, Scandium(III) Zeolites as New Heterogeneous Catalysts: [4+2]Cyclocondensation of in situ Generated Aryl Imines with Alkenes, *Chemistry – A European Journal*, 2011, **17**, 1907-1914.
10. V. Sridharan, C. Avendaño and J. C. Menéndez, CAN-Catalyzed Vinylogous Povarov Reactions: The First Three-Component Synthesis of 2-Functionalized Tetrahydroquinolines from Anilines, -Cinnamaldehyde and Vinyl Ethers, *Synlett*, 2007, **2007**, 1079-1082.
11. X. Feng, Y. Song and W. Lin, Dimensional Reduction of Lewis Acidic Metal–Organic Frameworks for Multicomponent Reactions, *Journal of the American Chemical Society*, 2021, **143**, 8184-8192.
12. G. Maiti and P. Kundu, Imino Diels–Alder reactions: an efficient one-pot synthesis of pyrano and furanoquinoline derivatives catalyzed by SbCl<sub>3</sub>, *Tetrahedron Letters*, 2006, **47**, 5733-5736.
13. M. Mahesh, C. V. Reddy, K. S. Reddy, P. V. K. Raju and V. V. N. Reddy, Imino Diels–Alder Reactions: Efficient Synthesis of Pyrano and Furoquinolines Catalyzed by ZrCl<sub>4</sub>, *Synthetic Communications*, 2004, **34**, 4089-4104.
14. A. Kumar, S. Srivastava, G. Gupta, V. Chaturvedi, S. Sinha and R. Srivastava, Natural Product Inspired Diversity Oriented Synthesis of Tetrahydroquinoline Scaffolds as Antitubercular Agent, *ACS Combinatorial Science*, 2011, **13**, 65-71.
15. O. M. Kuzmina, A. K. Steib, D. Flubacher and P. Knochel, Iron-Catalyzed Cross-Coupling of N-Heterocyclic Chlorides and Bromides with Arylmagnesium Reagents, *Organic Letters*, 2012, **14**, 4818-4821.
